# Supplementary material for: Oxidative peptide bond formation of glycine–amino acid using 2-(aminomethyl)malononitrile as a glycine unit
Source: Royal Society of Chemistry journal article supplement (doi:10.1039/d1cc00130b), 2021-01-01
Supplement: d1cc00130b1.pdf [file d1cc00130b1.pdf]

## **Oxidative Peptide Bond Formation of Glycine-Amino Acid using 2-(Aminomethyl)malononitrile as a Glycine Unit**

Xiaoling Wang, Jing Li, Yujiro Hayashi\*

Department of Chemistry, Graduate School of Science, Tohoku University, 6-3 Aramaki Aza-Aoba, Aoba-ku, Sendai, Miyagi 980-8578, Japan

### **SUPPORTING INFORMATION**

Experimental procedures and Characterization data

### **Table of Contents**

|                                                                                                                       |           |
|-----------------------------------------------------------------------------------------------------------------------|-----------|
| <b>1. Materials and Methods .....</b>                                                                                 | <b>2</b>  |
| <b>2. Experimental procedure .....</b>                                                                                | <b>3</b>  |
| 2.1 Synthesis of 2-(aminomethylene)malononitrile SS1 <sup>1</sup> .....                                               | 3         |
| 2.2 Synthesis of dicyano compound 1a and physical information.....                                                    | 3         |
| 2.3 Synthesis of dicyano compound 1b and physical information .....                                                   | 4         |
| 2.4 Synthesis of dicyano compound 1c and physical information.....                                                    | 5         |
| 2.5 Synthesis of dicyano compound 1d and physical information .....                                                   | 7         |
| 2.6 Synthesis of <i>L</i> -Cysteine-(S-Trityl)-OMe s5 and physical information.....                                   | 9         |
| 2.7 Typical procedure of oxidative peptide synthesis using amino acid esters/dipeptide and physical information ..... | 9         |
| 2.8 Typical procedure of oxidative peptide synthesis using unprotected amino acid and physical information.....       | 30        |
| <b>3. Reference .....</b>                                                                                             | <b>33</b> |
| <b>4. Spectra.....</b>                                                                                                | <b>34</b> |

## 1. Materials and Methods

### General Methods

General Remarks: All reactions were carried out under argon atmosphere and monitored by thin-layer chromatography using Merck 60 F254 precoated silica gel plates (0.25 mm thickness). Specific optical rotations were measured using a JASCO P-1020 polarimeter and a JASCO DIP-370 polarimeter. FT-IR spectra were recorded on a JASCO FT/IR-410 spectrometer and a Perkin Elmer spectrum BX FT-IP spectrometer.  $^1\text{H}$  and  $^{13}\text{C}$  NMR spectra were recorded on an Agilent-400 MR (400 MHz for  $^1\text{H}$  NMR, 100 MHz for  $^{13}\text{C}$  NMR) instrument. Data for  $^1\text{H}$  NMR are reported as chemical shift ( $\delta$  ppm), integration multiplicity (s = singlet, d = doublet, t = triplet, q = quartet, quintet = quin, septet = sep, dd = doublet of doublets, ddd = doublet of doublet of doublets, dt = double of triplets, td = triplet of doublets, m = multiplet, brs = broad singlet), coupling constant (Hz), Data for  $^{13}\text{C}$  NMR are reported as chemical shift. High resolution ESI-TOF mass spectra were measured by Thermo Orbi-trap instrument.

General Methods. General Remarks: All reactions were carried out under argon atmosphere and monitored by thin-layer chromatography using Merck 60 F254 precoated silica gel plates (0.25 mm thickness). Specific optical rotations were measured using a JASCO P-1020 polarimeter and a JASCO DIP-370 polarimeter. FT-IR spectra were recorded on a JASCO FT/IR-410 spectrometer and a Perkin Elmer spectrum BX FT-IP spectrometer.  $^1\text{H}$  and  $^{13}\text{C}$  NMR spectra were recorded on an Agilent-400 MR (400 MHz for  $^1\text{H}$  NMR, 100 MHz for  $^{13}\text{C}$  NMR) instrument. Data for  $^1\text{H}$  NMR are reported as chemical shift ( $\delta$  ppm), integration multiplicity (s = singlet, d = doublet, t = triplet, q = quartet, quintet = quin, septet = sep, dd = doublet of doublets, ddd = doublet of doublet of doublets, dt = double of triplets, td = triplet of doublets, m = multiplet, brs = broad singlet), coupling constant (Hz), Data for  $^{13}\text{C}$  NMR are reported as chemical shift. High resolution ESI-TOF mass spectra were measured by Thermo Orbi-trap instrument.



**HRMS** (ESI)  $m/z$ : Calcd for  $[M+Na]^+$  363.1428; Found: 363.1424

**FT-IR** (neat): 2361, 2233, 1684, 1614, 1497, 1367, 1252, 1165, 700  $\text{cm}^{-1}$

$[\alpha]_D^{24}$  2.47 (c 1.0, DMSO)

**tert-Butyl (S)-((2,2-dicyanoethyl)amino)-1-oxo-3-phenylpropan-2-yl)carbamate**

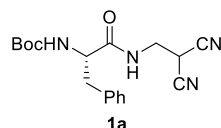

**1a** was obtained in 65% yield as white solid.

**$^1\text{H}$  NMR** (399 MHz,  $\text{DMSO-d}_6$ )  $\delta$  8.66 (t,  $J$  = 6.1 Hz, 1H), 7.33 – 7.09 (m, 5H), 6.99 (d,  $J$  = 8.6 Hz, 1H), 4.85 (t,  $J$  = 6.2 Hz, 1H), 4.16 (td,  $J$  = 10.7, 4.1 Hz, 1H), 3.77 (dt,  $J$  = 12.8, 6.3 Hz, 1H), 3.69 – 3.59 (m, 1H), 2.92 (dd,  $J$  = 13.7, 4.0 Hz, 1H), 2.71 (dd,  $J$  = 13.7, 10.8 Hz, 1H), 1.25 (s, 9H).

**$^{13}\text{C}$  NMR** (100 MHz,  $\text{DMSO-d}_6$ )  $\delta$  173.4, 155.7, 138.4, 129.6 (2C), 128.5 (2C), 126.7, 113.7(2C), 78.5, 56.1, 38.6, 37.8, 28.5 (3C), 24.1.

**HRMS** (ESI)  $m/z$ : Calcd for  $[M+Na]^+$  365.1584; Found: 365.1586

**FT-IR** (neat): 3291, 2979, 1668, 1526, 1367, 1249, 1168, 910, 734  $\text{cm}^{-1}$

$[\alpha]_D^{27}$  -0.64 (c 1.0  $\text{CHCl}_3$ )

**2.3 Synthesis of dicyano compound 1b and physical information**

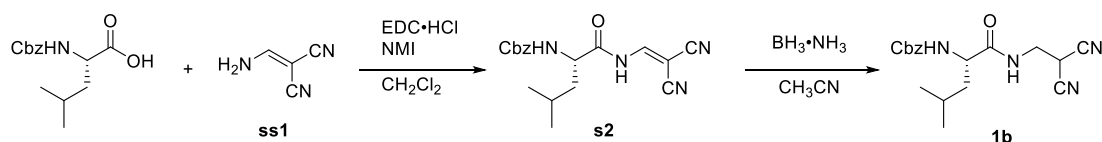

To a mixture of **SS1** (0.46 g, 4.94 mmol) in  $\text{CH}_2\text{Cl}_2$  (33 mL) was added N-Benzyloxycarbonyl-L-leucine (1.44 g, 5.44 mmol), 1-Methylimidazole (40.6 mg, 0.494 mmol), EDC·HCl (1.56 g, 8.15 mmol). The mixture was stirred at room temperature overnight and then quenched with 1N HCl and extracted with  $\text{CH}_2\text{Cl}_2$ . The organic phase was concentrated under reduced pressure. Purification by silica gel column chromatography (EtOAc/Hexane=30%/70%) gave the desired product **S2**. To a mixture of **S2** (1.0 g, 2.94 mmol) in  $\text{CH}_3\text{CN}$  (33 mL) was added  $\text{BH}_3\cdot\text{NH}_3$  (0.97 g, 29.4 mmol). The mixture was stirred at room temperature for 1 h. Then the reaction mixture was slowly added to a mixture of cold 1N HCl/EtOAc = 2/1 and extracted with EtOAc. The organic phase was collected and concentrated under reduced pressure. The crude product was purified by silica gel column chromatography (EtOAc/Hexane = 50%/50%) and gave compound **1b**.

**Benzyl (S)-1-((2,2-dicyanovinyl)amino)-4-methyl-1-oxopentan-2-yl)carbamate**

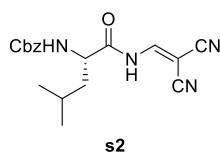

**S2** was obtained in 61% yield as white solid.

**<sup>1</sup>H NMR** (399 MHz, CDCl<sub>3</sub>) δ 10.22 (d, *J* = 11.8 Hz, 1H), 8.16 (d, *J* = 12.0 Hz, 1H), 7.56 – 7.02 (m, 5H), 5.36 (d, *J* = 5.4 Hz, 1H), 5.10 (d, *J* = 19.7 Hz, 2H), 4.43 (s, 1H), 1.84 – 1.40 (m, 3H), 0.95 (d, *J* = 6.2 Hz, 3H), 0.91 (d, *J* = 6.1 Hz, 3H).

**<sup>13</sup>C NMR** (100 MHz, CDCl<sub>3</sub>) δ 170.6, 157.1, 151.2, 135.3, 128.7(2C), 128.6 (2C), 128.3, 112.3, 110.6, 68.1, 66.2, 53.5, 39.4, 24.6, 22.8, 21.5.

**HRMS** (ESI) *m/z*: Calcd for [M+Na]<sup>+</sup> 363.1428; Found: 363.1427.

**FT-IR** (neat): 3020, 2963, 2400, 2235, 1703, 1615, 1508, 1216, 1044, 754, 669 cm<sup>-1</sup>

[α]<sub>D</sub><sup>28</sup> 8.97 (c 2.2 CHCl<sub>3</sub>)

**Benzyl (S)-1-((2,2-dicyanoethyl)amino)-4-methyl-1-oxopentan-2-yl)carbamate**

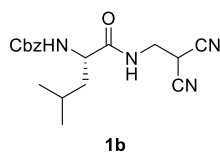

**1b** was obtained in 72% yield as white solid.

**<sup>1</sup>H NMR** (399 MHz, CDCl<sub>3</sub>) δ 7.55 (brs, 1H), 7.43 – 7.21 (m, 5H), 5.48 (d, *J* = 7.6 Hz, 1H), 5.09 (s, 2H), 4.32 – 4.19 (m, 1H), 4.18 – 4.12 (m, 1H), 3.77 – 3.64 (m, 1H), 3.63 – 3.54 (m, 1H), 1.72 – 1.57 (m, 2H), 1.55 – 1.44 (m, 1H), 0.92 (d, *J* = 6.3 Hz, 3H), 0.89 (d, *J* = 6.1 Hz, 3H).

**<sup>13</sup>C NMR** (100 MHz, CDCl<sub>3</sub>) δ 174.0, 156.5, 135.9, 128.6 (2C), 128.4, 127.9 (2C), 111.3 (2C), 67.4, 53.3, 40.7, 39.7, 24.7 (2C), 22.7, 21.9.

**HRMS** (ESI) *m/z*: Calcd for [M+Na]<sup>+</sup> 365.1584; Found: 365.1586.

**FT-IR** (neat): 3300, 3067, 2959, 2259, 1672, 1534, 1455, 1368, 1239, 1173, 1122, 1043, 911, 736, 698 cm<sup>-1</sup>

[α]<sub>D</sub><sup>25</sup> -24.00 (c 1.9 CHCl<sub>3</sub>)

**2.4 Synthesis of dicyano compound 1c and physical information**

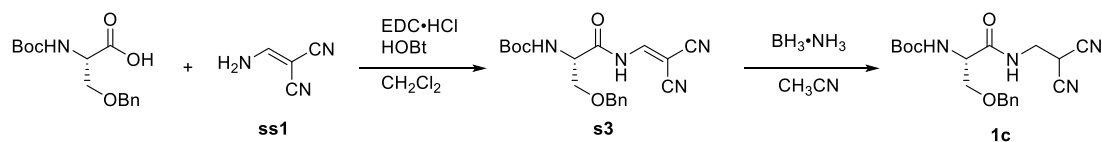

To a mixture of **SS1** (600 mg, 6.45 mmol) in  $\text{CH}_2\text{Cl}_2$  (26 mL) was added *N*-(*tert*-Butoxycarbonyl)-*O*-benzyl-*L*-serine (2.09 g, 7.09 mmol), 1-Hydroxybenzotriazole Monohydrate (99.0 mg, 0.645 mmol), EDC·HCl (1.63 g, 8.51 mmol). The mixture was stirred at room temperature overnight and then quenched with 1N HCl and extracted with  $\text{CH}_2\text{Cl}_2$ . The organic phase was concentrated under reduced pressure. Purification by silica gel column chromatography (EtOAc/Hexane=50%/50%) gave the desired product **S3**. To a mixture of **S3** (400 mg, 1.08 mmol) in  $\text{CH}_3\text{CN}$  (39 mL) was added  $\text{BH}_3\cdot\text{NH}_3$  (330 mg, 10.8 mmol). The mixture was stirred at room temperature for 4 h. Then the reaction mixture was slowly added to a mixture of cold 1N HCl /EtOAc = 2/1 and extracted with EtOAc. The organic phase was collected, dried over  $\text{Na}_2\text{SO}_4$  and concentrated under reduced pressure. The crude product was purified by silica gel column chromatography (EtOAc/Hexane = 35%/65%) and gave compound **1c**.

***tert*-Butyl (*S*)-(3-(benzyloxy)-1-((2,2-dicyanovinyl)amino)-1-oxopropan-2-yl)carbamate**

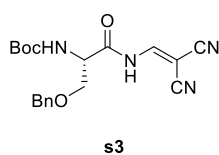

**S3** was obtained in 42% yield as white solid.

**$^1\text{H}$  NMR** (399 MHz,  $\text{CDCl}_3$ )  $\delta$  10.01 (s, 1H), 8.16 (d,  $J = 12.7$  Hz, 1H), 7.42 – 7.25 (m, 5H), 5.33 (s, 1H), 4.59 (s, 2H), 4.45 – 4.35 (m, 1H), 3.93 (dd,  $J = 9.3, 3.6$  Hz, 1H), 3.63 (dd,  $J = 9.5, 6.1$  Hz, 1H), 1.45 (s, 9H).

**$^{13}\text{C}$  NMR** (100 MHz,  $\text{CDCl}_3$ )  $\delta$  168.4, 150.4 (2C), 136.2, 128.7 (2C), 128.4, 128.1 (2C), 112.0, 110.2, 82.1, 73.9, 67.6, 66.8, 54.5, 28.2 (3C).

**HRMS** (ESI)  $m/z$ : Calcd for  $[\text{M}+\text{Na}]^+$  393.1533; Found: 393.1534.

**FT-IR** (neat): 3289, 1719, 1686, 1625, 1498, 1368, 1250, 1131, 738, 696  $\text{cm}^{-1}$

$[\alpha]_D^{27}$  -5.27 (c 0.85  $\text{CHCl}_3$ )



**oxo-3-phenylpropan-2-yl)carbamate**

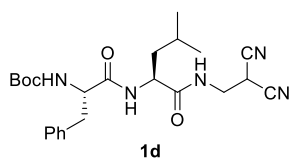

**1d** was obtained in 29% yield as white solid (**mixture of two rotamers**).

**<sup>1</sup>H NMR** (399 MHz, DMSO-*d*<sub>6</sub>) δ 8.83 – 8.54 (m, 1H), (8.14 (d, *J* = 8.3 Hz) and 7.97 (d, *J* = 8.2 Hz), 1H), 7.34 – 7.10 (m, 5H), (6.94 (d, *J* = 8.0 Hz) and 6.88 (d, *J* = 8.4 Hz), 1H), 4.92 – 4.81 and 4.41 – 4.04 (m, 1H), 4.41 – 4.07 (m, 2H), 3.82 – 3.54 (m, 2H), (2.93 (dd, *J* = 13.8, 4.0 Hz) and 2.86 (dd, *J* = 13.5, 5.9 Hz), 1H), 2.79 – 2.61 (m, 1H), 1.73 – 1.56 (m, 1H), 1.53 – 1.36 (m, 2H), 1.28 and 1.26 (s, 9H), (0.86 (d, *J* = 6.8 Hz) and 0.78 (d, *J* = 6.0 Hz), 3H), (0.81 (d, *J* = 6.4 Hz) and 0.71 (d, *J* = 6.4 Hz), 3H).

**<sup>13</sup>C NMR** (100 MHz, DMSO-*d*<sub>6</sub>) δ 173.6 and 173.5 (1C), 172.0 and 171.9 (1C), 155.7 and 155.7 (1C), 138.6 and 138.1 (1C), 129.6 (2C), 128.4 (2C), 126.6 and 126.5 (1C), 113.6 and 113.6 (2C), 78.7 and 78.5 (1C), 56.3 and 56.0 (1C), 51.3 and 51.2 (1C), 41.6 and 41.3 (1C), 38.5, 38.0 and 37.5 (1C), 28.6 and 28.5 (3C), 24.4 and 24.3 (1C), 24.1 and 24.1 (1C), 23.5 and 23.4 (1C), 22.0 and 21.7 (1C).

**HRMS** (ESI) *m/z*: Calcd for [M+Na]<sup>+</sup> 478.2425; Found 478.2424.

**FT-IR** (neat): 3287, 2961, 2256, 1650, 1524, 1368, 1251, 1169, 1049, 910, 735, 700 cm<sup>-1</sup>

[α]<sub>D</sub><sup>28</sup> -4.81 (c 1.0 CHCl<sub>3</sub>)

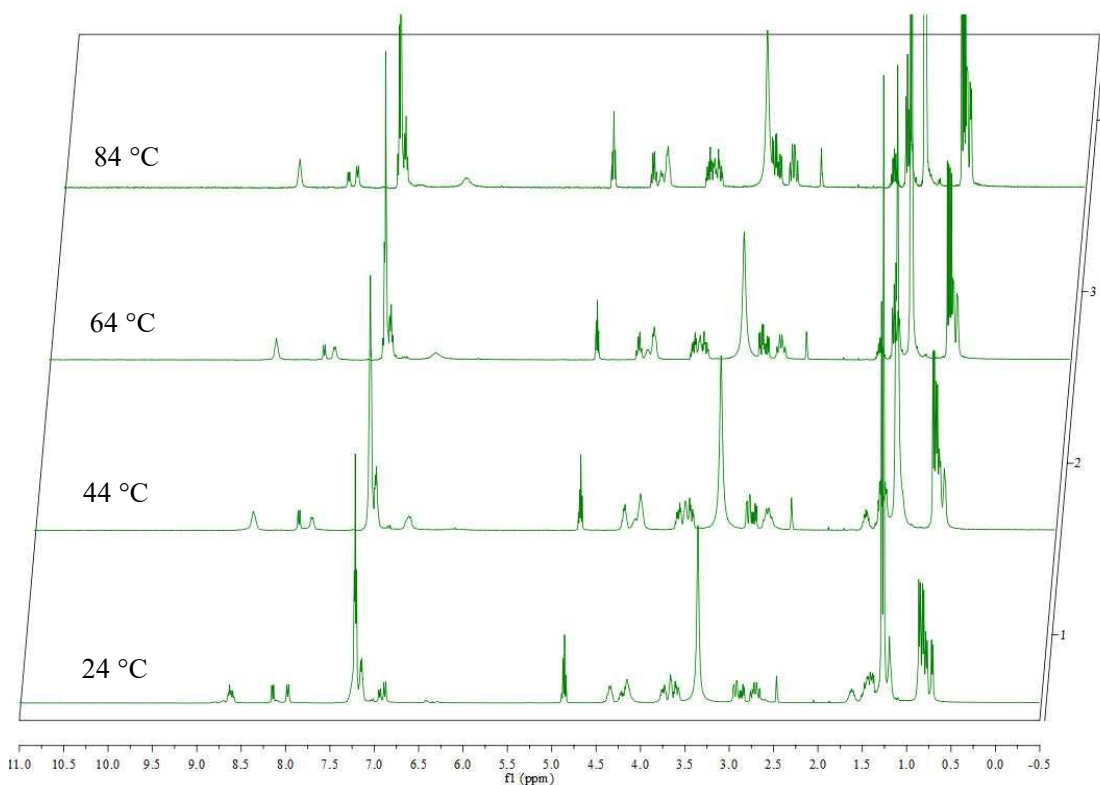

Variable temperature  $^1\text{H}$  NMR (399 Hz, DMSO- $d_6$ ) spectra of compound **1d** to prove the rotamer.

## 2.6 Synthesis of *L*-Cysteine-(*S*-Trityl)-OMe **s5** and physical information

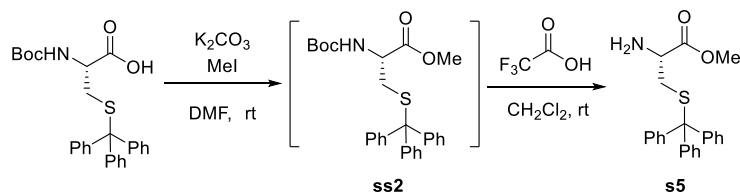

To a mixture of Boc-*L*-Cys-(*S*-Trityl)-OH (1.00 g, 2.16 mmol) and Iodomethane (403  $\mu\text{L}$ , 6.47 mmol) in DMF (4.3 mL) was added  $\text{K}_2\text{CO}_3$  (1.34 g, 9.71 mmol). The mixture was stirred at room temperature for 3 h, and then cooled to 0  $^\circ\text{C}$  and quenched by saturated  $\text{NH}_4\text{Cl}$  solution. The mixture was then extracted with EtOAc and the organic phase was collected and dried over  $\text{Na}_2\text{SO}_4$ , concentrated under reduced pressure. The crude product was purified by silica gel column chromatography (Hexane/EtOAc=50%/50%) to give **ss2** as a white solid. It was used directly for the next step without determining the structure. To a mixture of **ss2** (1.03 g, 2.16 mmol) in  $\text{CH}_2\text{Cl}_2$  (20 mL) was added 2,2,2-trifluoroacetic acid (2.46 g, 21.6 mmol). The mixture was stirred at room temperature for 2.5 h and quenched by saturated  $\text{NaHCO}_3$  solution and extracted with  $\text{CH}_2\text{Cl}_2$ . The organic phase was collected, dried over  $\text{Na}_2\text{SO}_4$  and concentrated under reduced pressure. The crude product was purified by silica gel column chromatography (Hexane/EtOAc=25%/75%) to give **s5** as colorless oil.

### Methyl *S*-trityl-*L*-cysteinate

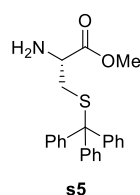

**S5** was obtained in 86% yield as colorless oil.

$^1\text{H}$  NMR (399 MHz,  $\text{CDCl}_3$ )  $\delta$  7.48 – 7.36 (m, 6H), 7.32 – 7.24 (m, 6H), 7.23 – 7.17 (m, 3H), 3.64 (s, 3H), 3.24 – 3.17 (m, 1H), 2.62 (dd,  $J$  = 12.6, 4.8 Hz, 1H), 2.51 (dd,  $J$  = 12.6, 7.8 Hz, 1H), 2.35 (s, 2H).

$^{13}\text{C}$  NMR (100 MHz,  $\text{CDCl}_3$ )  $\delta$  173.6, 144.4, 129.6, 128.0, 126.8, 66.9, 53.6, 52.3, 36.5.

HRMS (ESI)  $m/z$ : Calcd for  $[\text{M}+\text{Na}]^+$  400.1342; Found 400.1346.

FT-IR (neat): 3057, 1739, 1595, 1489, 1443, 1200, 1034, 744, 701, 622  $\text{cm}^{-1}$

$[\alpha]_D^{29}$  41.53 (c 4.4  $\text{CHCl}_3$ )

## 2.7 Typical procedure of oxidative peptide synthesis using amino acid esters/dipeptide and

## physical information

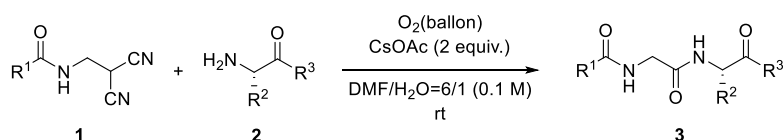

To a mixture of the amino acid ester **2** (0.4 mmol) in DMF/H<sub>2</sub>O = 6/1 (2 mL) was added CsOAc (76.8 mg, 0.4 mmol). The mixture was stirred and CsOAc dissolved and then was filled with O<sub>2</sub>. The dicyano compound **1** (0.2 mmol) was then added and stirred at room temperature. The mixture was then diluted by EtOAc and quenched with 1N HCl and extracted with EtOAc. The organic phase was washed with water/brine = 1/1 and dried over Na<sub>2</sub>SO<sub>4</sub>, filtered, and concentrated in vacuo. The crude product was purified by silica gel column chromatography, eluted with Hexane/EtOAc.

### Methyl (*tert*-butoxycarbonyl)-*L*-phenylalanylglycyl-*L*-phenylalaninate

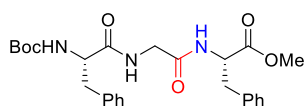

Boc-Phe-Gly-Phe-OMe (**3a**)

**3a** was obtained in 58% yield as yellow solid. Purification by EtOAc/Hexane = 65%/35%

**<sup>1</sup>H NMR** (399 MHz, DMSO-*d*<sub>6</sub>) δ 8.26 (d, *J* = 7.4 Hz, 1H), 8.10 (s, 1H), 7.29 – 7.09 (m, 10H), 6.96 – 6.87 (m, 1H), 4.46 (dd, *J* = 13.7, 8.0 Hz, 1H), 4.13 (dd, *J* = 12.8, 5.5 Hz, 1H), 3.81 – 3.60 (m, 2H), 3.56 (s, 3H), 3.05 – 2.83 (m, 3H), 2.67 (dd, *J* = 13.3, 11.0 Hz, 1H), 1.25 (s, 9H). **<sup>13</sup>C NMR** (100 MHz, DMSO-*d*<sub>6</sub>) δ 172.3, 172.2, 169.2, 155.7, 138.7, 137.4, 129.6 (2C), 129.5 (2C), 128.7 (2C), 128.4 (2C), 127.0, 126.5, 78.5, 56.1, 54.1, 52.3, 42.1, 37.8, 37.2, 28.5 (3C).

**HRMS** (ESI) *m/z*: Calcd for [M+Na]<sup>+</sup> 506.2262; Found: 506.2260

**FT-IR** (neat): 3301, 2979, 1657, 1525, 1455, 1367, 1251, 1171, 1022, 911, 734, 701 cm<sup>-1</sup>

[α]<sub>D</sub><sup>26</sup> 30.74 (c 1.1 CHCl<sub>3</sub>)

### *tert*-Butyl (*tert*-butoxycarbonyl)-*L*-phenylalanylglycyl-*L*-phenylalaninate

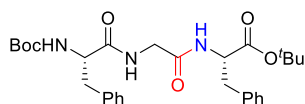

Boc-Phe-Gly-Phe-OBu (**3b**)

**3b** was obtained in 50% yield as white solid (**mixture of two rotamers**). Purification by EtOAc/Hexane = 60%/40%;

**<sup>1</sup>H NMR** (399 MHz, DMSO-*d*<sub>6</sub>) δ 8.18 – 8.05 (m, 2H), 7.37 – 7.05 (m, 10H), 6.97 – 6.88 (m, 1H), 4.34 (dt, *J* = 7.3, 6.1 Hz, 1H), 4.13 (dd, *J* = 13.0, 6.0 Hz, 1H), 3.70 (d, *J* = 5.5 Hz, 2H), 2.99 – 2.84 (m, 3H), 2.68 (dd, *J* = 13.5, 10.9 Hz, 1H), 1.28 (s, 9H), 1.25 and 1.26 (s, 9H).

**$^{13}\text{C}$  NMR** (100 MHz,  $\text{DMSO-d}_6$ )  $\delta$  172.4, 170.8, 169.1, 155.7, 138.7, 137.4, 129.6 (2C), 129.6 (2C), 128.6 (2C), 128.4 (2C), 127.0, 126.5, 81.2, 78.4, 56.1, 54.5, 42.1, 37.8, 37.6, 28.6 (3C), 27.9 (3C).

**HRMS** (ESI)  $m/z$ : Calcd for  $[\text{M}+\text{Na}]^+$  548.2731; Found: 548.2733

**FT-IR** (neat): 3299, 2979, 1652, 1523, 1455, 1368, 1252, 1160, 911, 734, 700  $\text{cm}^{-1}$

$[\alpha]_{\text{D}}^{25}$  28.43 (c 1.0  $\text{CHCl}_3$ )

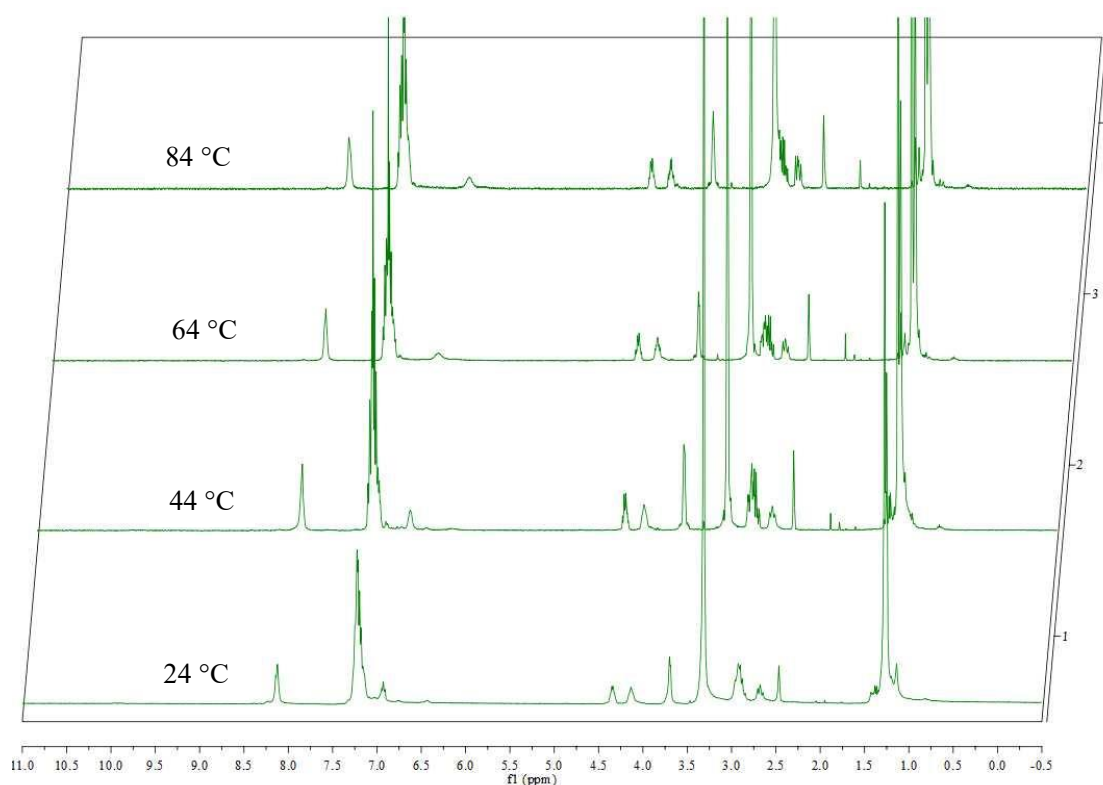

Variable temperature  $^1\text{H}$  NMR (399 Hz,  $\text{DMSO-d}_6$ ) spectra of compound **3b** to prove the rotamer.

### Methyl (*tert*-butoxycarbonyl)-*L*-phenylalanylglycyl-*L*-tyrosinate

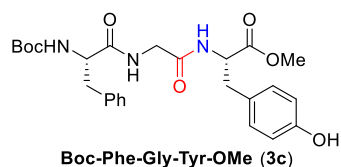

**3c** was obtained in 52% yield as white solid. Purification by EtOAc/Hexane = 75%/25%

**$^1\text{H}$  NMR** (399 MHz,  $\text{DMSO-d}_6$ )  $\delta$  9.20 (s, 1H), 8.25 – 8.15 (m, 1H), 8.11 (t,  $J = 5.2$  Hz, 1H), 7.31 – 7.07 (m, 5H), 7.06 – 6.85 (m, 1H) 7.06 – 6.85 (m, 2H), 6.63 (d,  $J = 8.3$  Hz, 2H), 4.37 (dd,  $J = 13.9, 8.0$  Hz, 1H), 4.13 (dd,  $J = 12.9, 6.0$  Hz, 1H), 3.81 – 3.62 (m, 2H), 3.55 (s, 3H), 3.01 – 2.83 (m, 2H), 2.77 (dd,  $J = 13.8, 8.5$  Hz, 1H), 2.68 (dd,  $J = 13.4, 11.1$  Hz, 1H), 1.25 (s, 9H).

**<sup>13</sup>C NMR** (100 MHz, DMSO-d<sub>6</sub>) δ 172.3, 169.1, 156.5, 155.7, 138.7 (2C), 130.4 (2C), 129.6 (2C), 128.4 (2C), 127.3, 126.5, 115.5 (2C), 78.5, 56.1, 54.4, 52.2, 42.1, 37.8, 36.6, 28.6 (3C).

**HRMS** (ESI) m/z: Calcd for [M+Na]<sup>+</sup> 522.2211; Found: 522.2211

**FT-IR** (neat): 3311, 1660, 1517, 1454, 1367, 1250, 1170, 1023, 910, 733 cm<sup>-1</sup>

[α]<sub>D</sub><sup>30</sup> 22.72 (c 1.8 CHCl<sub>3</sub>)

### **Methyl (tert-butoxycarbonyl)-L-phenylalanylglycyl-L-leucinate**

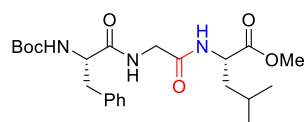

**Boc-Phe-Gly-Leu-OMe (3d)**

**3d** was obtained in 65% yield as yellow solid. Purification by EtOAc/Hexane=75%/25%

**<sup>1</sup>H NMR** (399 MHz, DMSO-d<sub>6</sub>) δ 8.19 – 8.06 (m, 2H), 7.29 – 7.19 (m, 4H), 7.15 (td, *J* = 8.2, 3.8 Hz, 1H), 6.94 (d, *J* = 8.4 Hz, 1H), 4.33 – 4.25 (m, 1H), 4.18 – 4.09 (m, 1H), 3.72 (d, *J* = 5.7 Hz, 2H), 3.59 (s, 3H), 2.98 (dd, *J* = 13.7, 3.9 Hz, 1H), 2.70 (dd, *J* = 13.6, 10.8 Hz, 1H), 1.64 – 1.41 (m, 3H), 1.26 (s, 9H), 0.86 (d, *J* = 6.4 Hz, 3H), 0.82 (d, *J* = 6.4 Hz, 3H).

**<sup>13</sup>C NMR** (100 MHz, DMSO-d<sub>6</sub>) δ 173.2, 172.3, 169.2, 155.7, 138.7, 129.6 (2C), 128.4 (2C), 126.5, 78.5, 56.1, 52.3, 50.6, 42.1, 37.7, 28.5 (3C), 24.6, 23.1, 21.8 (2C).

**HRMS** (ESI) m/z: Calcd for [M+Na]<sup>+</sup> 472.2418; Found: 472.2418

**FT-IR** (neat): 3316, 2959, 2252, 1668, 1518, 1368, 1251, 1160, 1025, 907, 734, 649 cm<sup>-1</sup>

[α]<sub>D</sub><sup>25</sup> 1.38 (c 2.4 CHCl<sub>3</sub>)

### **Methyl (tert-butoxycarbonyl)-L-phenylalanylglycyl-L-isoleucinate**

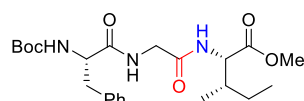

**Boc-Phe-Gly-Ile-OMe (3e)**

**3e** was obtained in 60% yield as yellow solid (**mixture of two rotamers**). Purification by EtOAc/Hexane = 75%/25%

**<sup>1</sup>H NMR** (399 MHz, DMSO-d<sub>6</sub>) δ 8.19 – 8.10 (m, 1H), 8.05 (dd, *J* = 12.8, 8.2 Hz, 1H), 7.29 – 7.19 (m, 4H), 7.15 (td, *J* = 8.3, 4.1 Hz, 1H), 6.93 (d, *J* = 8.5 Hz, 1H), 4.25 – 4.18 (m, 1H), 4.18 – 4.08 (m, 1H), 3.84 – 3.69 (m, 2H), 3.60 and 3.60 (s, 3H), 2.97 (dt, *J* = 13.6, 3.8 Hz, 1H), 2.69 (dd, *J* = 13.5, 11.0 Hz, 1H), 1.81 – 1.69 (m, 1H), 1.47 – 1.31 (m, 2H), 1.25 (s, 9H), 0.89 – 0.71 (m, 6H).

**<sup>13</sup>C NMR** (100 MHz, DMSO-d<sub>6</sub>) δ 172.4, 172.3, 169.3, 155.7, 138.7, 129.6 (2C), 128.4 (2C), 126.5, 78.4, 56.7, 56.1, 52.1, 42.2, 37.8, 36.8, 28.5 (3C), 25.1, 15.8, 11.5.

**HRMS** (ESI) m/z: Calcd for [M+Na]<sup>+</sup> 472.2418; Found: 472.2417

**FT-IR** (neat): 3304, 2969, 1655, 1526, 1455, 1366, 1252, 1170, 1022, 912, 734, 700  $\text{cm}^{-1}$

$[\alpha]_{\text{D}}^{29}$  14.23 (c 1.2  $\text{CHCl}_3$ )

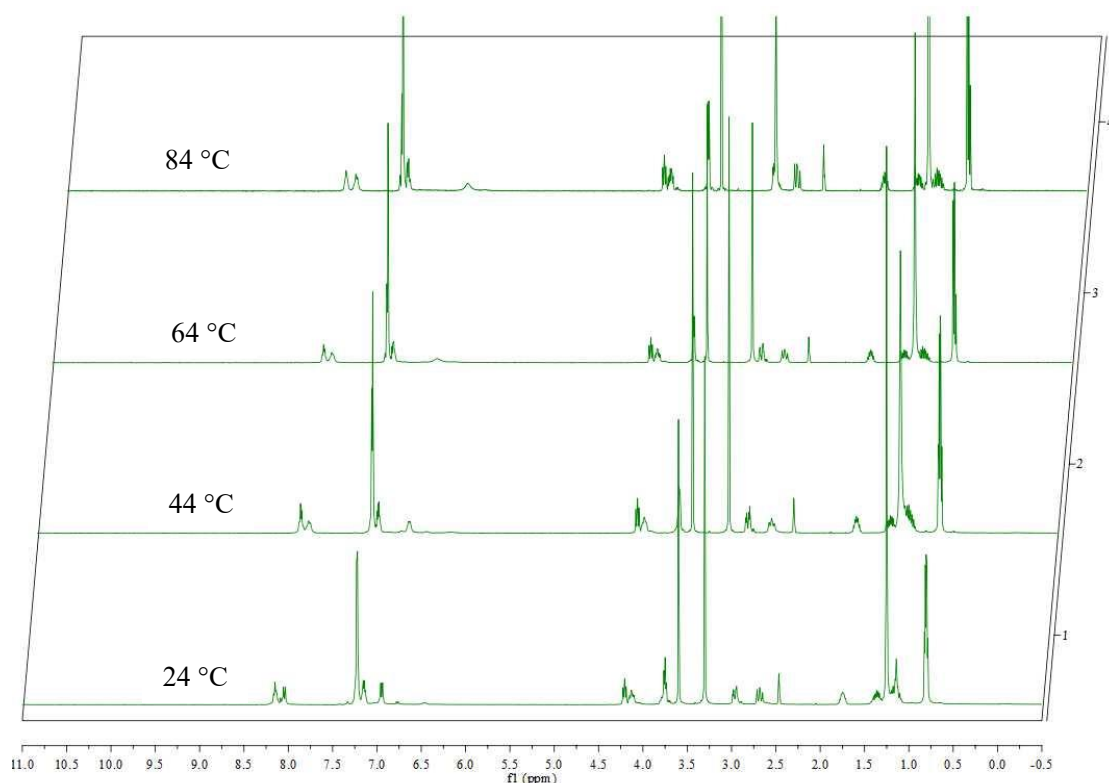

Variable temperature  $^1\text{H}$  NMR (399 Hz,  $\text{DMSO-d}_6$ ) spectra of compound **3e** to prove the rotamer.

**Methyl (*tert*-butoxycarbonyl)-*L*-phenylalanylglycyl-*L*-methioninate**

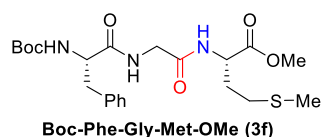

**3f** was obtained in 47% yield as yellow solid (**mixture of two rotamers**). Purification by EtOAc/Hexane = 80%/20%

$^1\text{H}$  NMR (399 MHz,  $\text{DMSO-d}_6$ )  $\delta$  8.24 – 8.09 (m, 2H), 7.29 – 7.20 (m, 4H), 7.16 (dd,  $J$  = 8.1, 4.2 Hz, 1H), 6.95 (dd,  $J$  = 12.9, 8.3 Hz, 1H), 4.44 – 4.35 (m, 1H), 4.12 (dd,  $J$  = 12.5, 6.1 Hz, 1H), 3.82 – 3.68 (m, 2H), 3.60 and 3.60 (s, 3H), 3.03 – 2.93 (m, 1H), 2.69 (dd,  $J$  = 13.5, 10.9 Hz, 1H), 2.54 – 2.38 (m, 2H), 2.00 (s, 3H), 1.97 – 1.79 (m, 2H), 1.26 (s, 9H).

$^{13}\text{C}$  NMR (100 MHz,  $\text{DMSO-d}_6$ )  $\delta$  172.5, 172.4, 169.4, 155.7, 138.7, 129.6, 128.4, 126.5, 78.5, 56.1, 52.4, 51.2, 42.2, 37.7, 31.1, 29.8, 28.5, 15.0 and 14.9 (1C).

**HRMS** (ESI)  $m/z$ : Calcd for  $[\text{M}+\text{Na}]^+$  490.1982; Found: 490.1981

**FT-IR** (neat): 3308, 2978, 1658, 1527, 1440, 1367, 1251, 1170, 1022, 912, 733, 701  $\text{cm}^{-1}$

$[\alpha]_D^{28} 11.35$  (c 1.8 CHCl<sub>3</sub>)

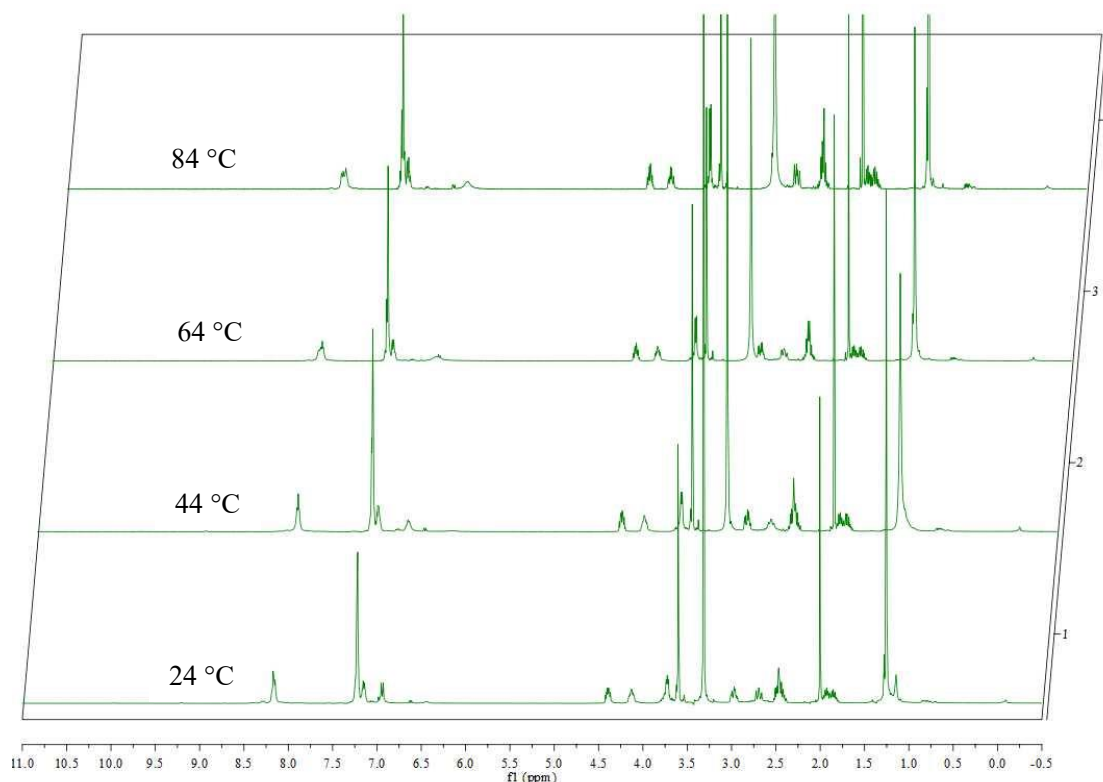

Variable temperature <sup>1</sup>H NMR (399 Hz, DMSO-d<sub>6</sub>) spectra of compound **3f** to prove the rotamer.

**tert-Butyl N-(tert-butoxycarbonyl)-L-phenylalanylglycyl-O-(tert-butyl)-L-serinate**

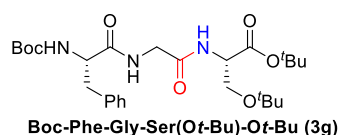

**3g** was obtained in 56% yield as yellow solid (**mixture of two rotamers**). Purification by EtOAc/Hexane = 55%/45%

**<sup>1</sup>H NMR** (399 MHz, DMSO-d<sub>6</sub>) δ 8.14 (t, *J* = 5.3 Hz, 1H), 7.89 (d, *J* = 8.0 Hz, 1H), 7.34 – 7.19 (m, 4H), 7.18 – 7.09 (m, 1H), 6.89 (d, *J* = 8.6 Hz, 1H), 4.31 (dt, *J* = 8.1, 4.2 Hz, 1H), 4.21 – 4.09 (m, 1H), 3.86 – 3.68 (m, 2H), 3.59 (dd, *J* = 8.9, 4.4 Hz, 1H), 3.40 (dd, *J* = 9.0, 4.3 Hz, 1H), 2.97 (dd, *J* = 13.7, 3.5 Hz, 1H), 2.69 (dd, *J* = 13.5, 10.9 Hz, 1H), 1.37 (s, 9H), 1.25 (s, 9H), 1.08 and 1.08 (s, 9H).

**<sup>13</sup>C NMR** (100 MHz, DMSO-d<sub>6</sub>) δ 172.4, 169.6, 169.2, 155.7, 138.7, 129.6(2C), 128.4(2C), 126.5, 81.1, 78.4, 73.1, 62.2, 56.1, 53.6, 42.2, 37.9, 28.5(3C), 28.1(3C), 27.5(3C).

**HRMS** (ESI) *m/z*: Calcd for [M+Na]<sup>+</sup> 544.2993; Found: 544.2993

**FT-IR** (neat): 3299, 2977, 1645, 1521, 1392, 1366, 1249, 1169, 734 cm<sup>-1</sup>

$[\alpha]_D^{27}$  18.07 (c 1.1 CHCl<sub>3</sub>)

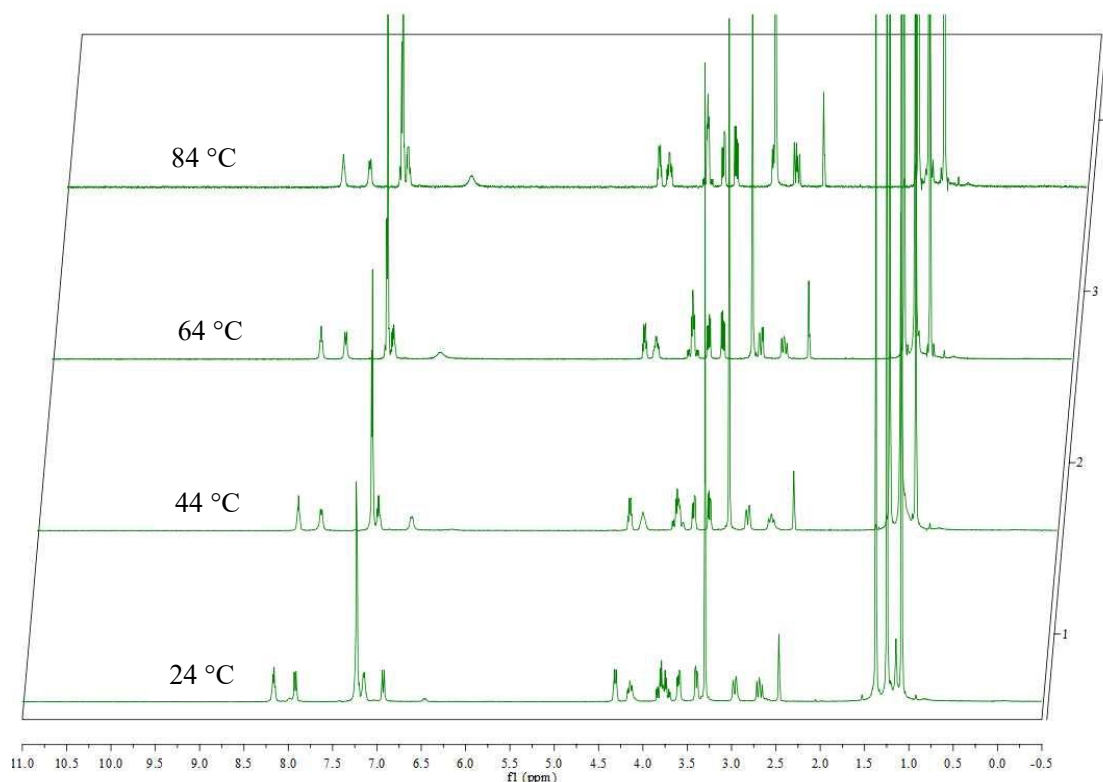

Variable temperature <sup>1</sup>H NMR (399 Hz, DMSO-d<sub>6</sub>) spectra of compound **3g** to prove the rotamer.

**tert-Butyl N-(tert-butoxycarbonyl)-L-phenylalanylglycyl-O-(tert-butyl)-L-threoninate**

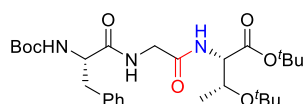

**Boc-Phe-Gly-Thr(Ot-Bu)-Ot-Bu (3h)**

**3h** was obtained in 51% yield as white solid (**mixture of two rotamers**). Purification by EtOAc/Hexane=50%/50%

**<sup>1</sup>H NMR** (399 MHz, DMSO-d<sub>6</sub>) δ 8.24 (dt, *J* = 28.2, 5.6 Hz, 1H), (7.61 (d, *J* = 8.8 Hz) and 7.56 (d, *J* = 8.8 Hz), 1H), 7.31 – 7.10 (m, 5H), 6.91 (t, *J* = 8.2 Hz, 1H), 4.27 – 4.10 (m, 2H), 4.07 – 3.99 (m, 1H), 3.92 – 3.80 (m, 1H), 3.74 (dd, *J* = 16.9, 5.2 Hz, 1H), 2.97 (dd, *J* = 13.6, 3.0 Hz, 1H), 2.70 (dd, *J* = 13.5, 11.2 Hz, 1H), 1.38 (s, 9H), 1.22 (s, 9H), 1.09 and 1.07 (s, 9H), (1.03 (d, *J* = 6.4 Hz) and 1.02 (d, *J* = 6.0 Hz), 3H).

**<sup>13</sup>C NMR** (100 MHz, DMSO-d<sub>6</sub>) δ 172.5, 169.7, 169.5, 155.6, 138.7, 129.6 (2C), 128.4 (2C), 126.5, 81.2 and 81.2 (1C), 78.4, 73.7, 67.3, 58.3, 56.2, 42.4, 38.0, 28.8 (3C), 28.5 (3C), 28.1 (3C), 20.3 and 20.4 (1C).

**HRMS** (ESI) *m/z*: Calcd for [M+Na]<sup>+</sup> 558.3150; Found: 558.3151

**FT-IR** (neat): 3299, 2978, 1652, 1520, 1367, 1251, 1169, 1084, 912, 734, 700 cm<sup>-1</sup>

$[\alpha]_D^{27}$  4.37 (c 1.2 CHCl<sub>3</sub>)

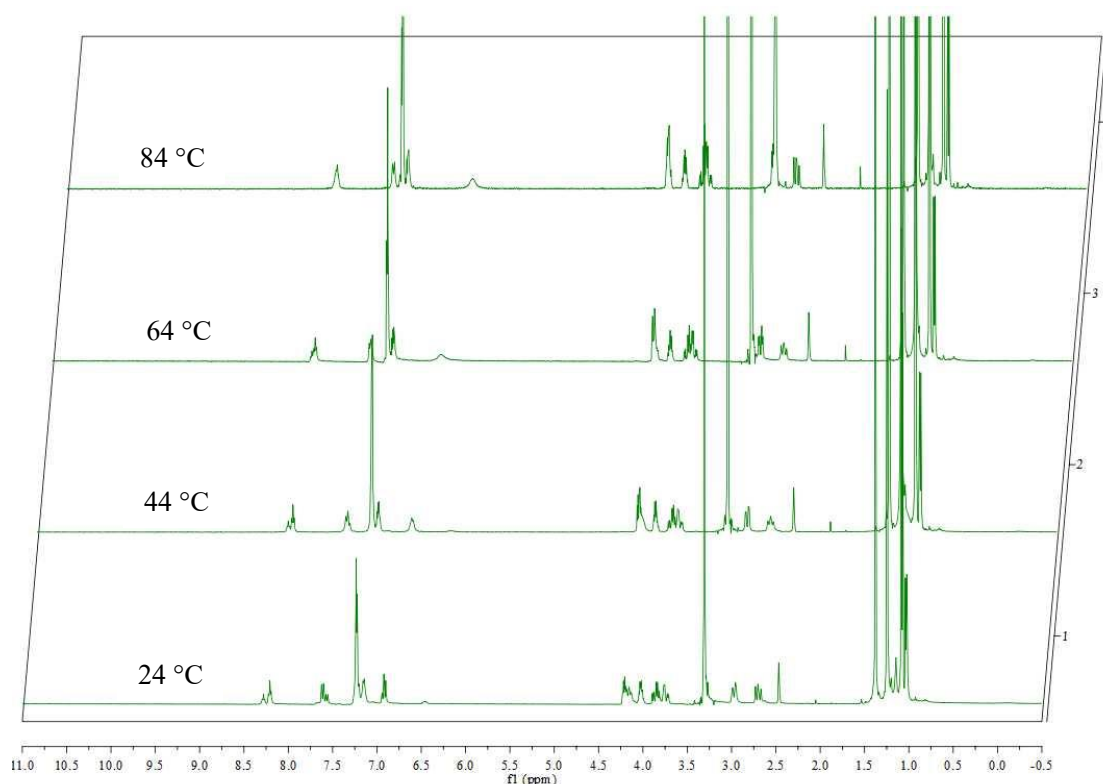

Variable temperature <sup>1</sup>H NMR (399 Hz, DMSO-d<sub>6</sub>) spectra of compound **3h** to prove the rotamer.

### Dimethyl (*tert*-butoxycarbonyl)-*L*-phenylalanylglycyl-*L*-glutamate

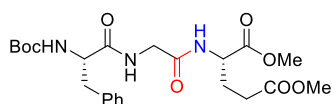

**Boc-Phe-Gly-Glu(OMe)-OMe (3i)**

**3i** was obtained in 32% yield as yellow solid (**mixture of two rotamers**). Purification by EtOAc/Hexane = 80%/20%

**<sup>1</sup>H NMR** (399 MHz, DMSO-d<sub>6</sub>) δ 8.21 – 8.10 (m, 2H), 7.32 – 7.19 (m, 4H), 7.18 – 7.09 (m, 1H), 6.95 (t, *J* = 8.3 Hz, 1H), 4.34 – 4.23 (m, 1H), 4.17 – 4.08 (m, 1H), 3.82 – 3.68 (m, 2H), 3.60 and 3.59 (s, 3H), 3.55 (s, 3H), 3.02 – 2.91 (m, 1H), 2.69 (dd, *J* = 13.4, 10.9 Hz, 1H), 2.35 (t, *J* = 7.5 Hz, 2H), 1.98 (dt, *J* = 13.3, 7.7 Hz, 1H), 1.89 – 1.75 (m, 1H), 1.25 (s, 9H).

**<sup>13</sup>C NMR** (100 MHz, DMSO-d<sub>6</sub>) δ 173.0, 172.4, 172.4, 169.4, 155.7, 138.7, 129.6 (2C), 128.4 (2C), 126.5, 78.5, 56.1, 52.4, 51.8, 51.5, 42.2, 37.7, 29.9 and 29.9 (1C), 28.5 (3C), 26.6.

**HRMS** (ESI) *m/z*: Calcd for [M+Na]<sup>+</sup> 502.2160; Found: 502.2159

**FT-IR** (neat): 3310, 2979, 1740, 1659, 1526, 1439, 1367, 1251, 1170, 1022, 915, 734 cm<sup>-1</sup>

$[\alpha]_D^{28}$  5.29 (c 2.4 CHCl<sub>3</sub>)

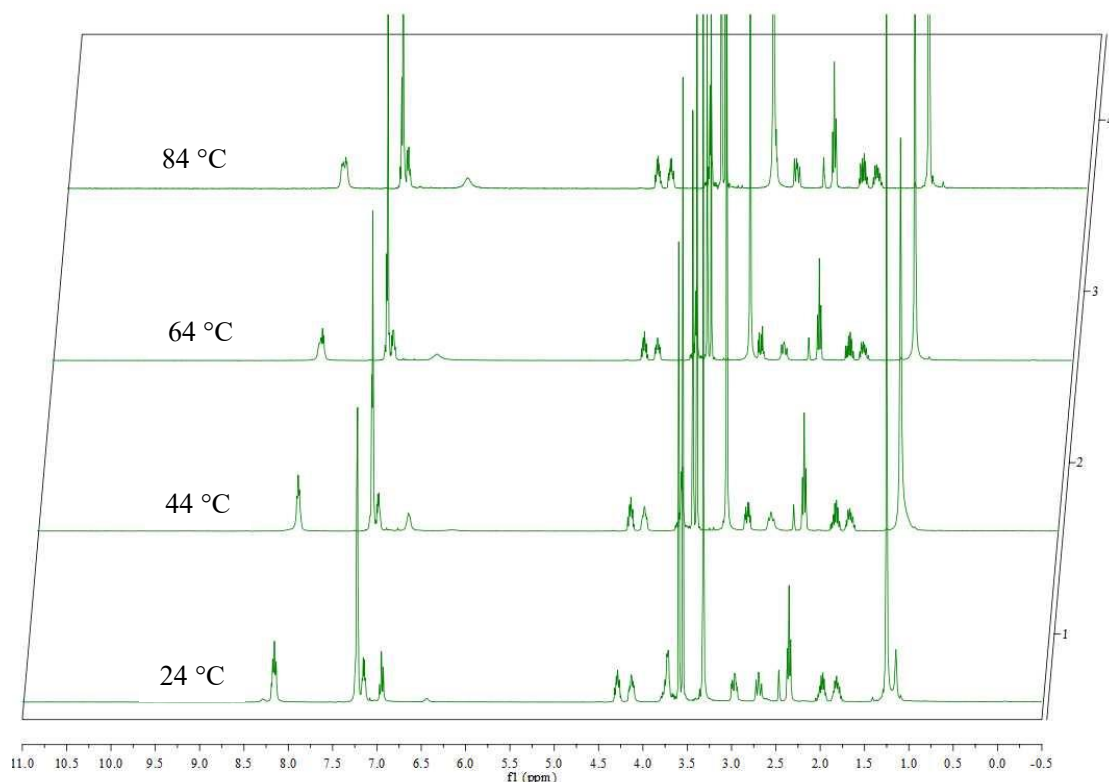

Variable temperature  $^1\text{H}$  NMR (399 Hz,  $\text{DMSO-d}_6$ ) spectra of compound **3i** to prove the rotamer.

**Methyl (*tert*-butoxycarbonyl)-*L*-phenylalanylglycyl-*L*-tryptophanate**

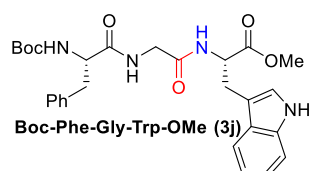

**3j** was obtained in 51% yield as yellow solid (**mixture of two rotamers**). Purification by EtOAc/Hexane = 60%/40%

$^1\text{H}$  NMR (399 MHz,  $\text{DMSO-d}_6$ )  $\delta$  10.82 (s, 1H), 8.21 (d,  $J = 7.4$  Hz, 1H), 8.09 (d,  $J = 5.9$  Hz, 1H), 7.44 (d,  $J = 7.8$  Hz, 1H), 7.29 (d,  $J = 8.0$  Hz, 1H), 7.21 (d,  $J = 4.2$  Hz, 4H), 7.16 – 7.09 (m, 2H), 7.02 (t,  $J = 7.4$  Hz, 1H), 6.95 (t,  $J = 7.4$  Hz, 1H), 6.89 (d,  $J = 8.5$  Hz, 1H), 4.55 – 4.46 (m, 1H), 4.18 – 4.09 (m, 1H), 3.80 – 3.64 (m, 2H), 3.58 and 3.57 (s, 3H), 3.13 (dd,  $J = 14.5, 6.0$  Hz, 1H), 3.07 – 2.90 (m, 2H), 2.76 – 2.63 (m, 1H), 1.24 (s, 9H).

$^{13}\text{C}$  NMR (100 MHz,  $\text{DMSO-d}_6$ )  $\delta$  172.5, 172.3, 169.1, 155.7, 138.7, 136.5, 129.6 (2C), 128.4 (2C), 127.5, 126.5, 124.2, 121.4, 118.9, 118.3, 111.9, 109.6 and 109.6 (1C), 78.5, 56.1, 53.6, 52.2, 42.2, 37.8, 28.5 (3C), 27.6.

HRMS (ESI)  $m/z$ : Calcd for  $[\text{M}+\text{H}]^+$  523.2551; Found: 523.2547

FT-IR (neat): 3308, 2917, 1662, 1523, 1456, 1367, 1251, 1168, 910, 735, 700  $\text{cm}^{-1}$

$[\alpha]_D^{24}$  21.29 (c 3.6 CHCl<sub>3</sub>)

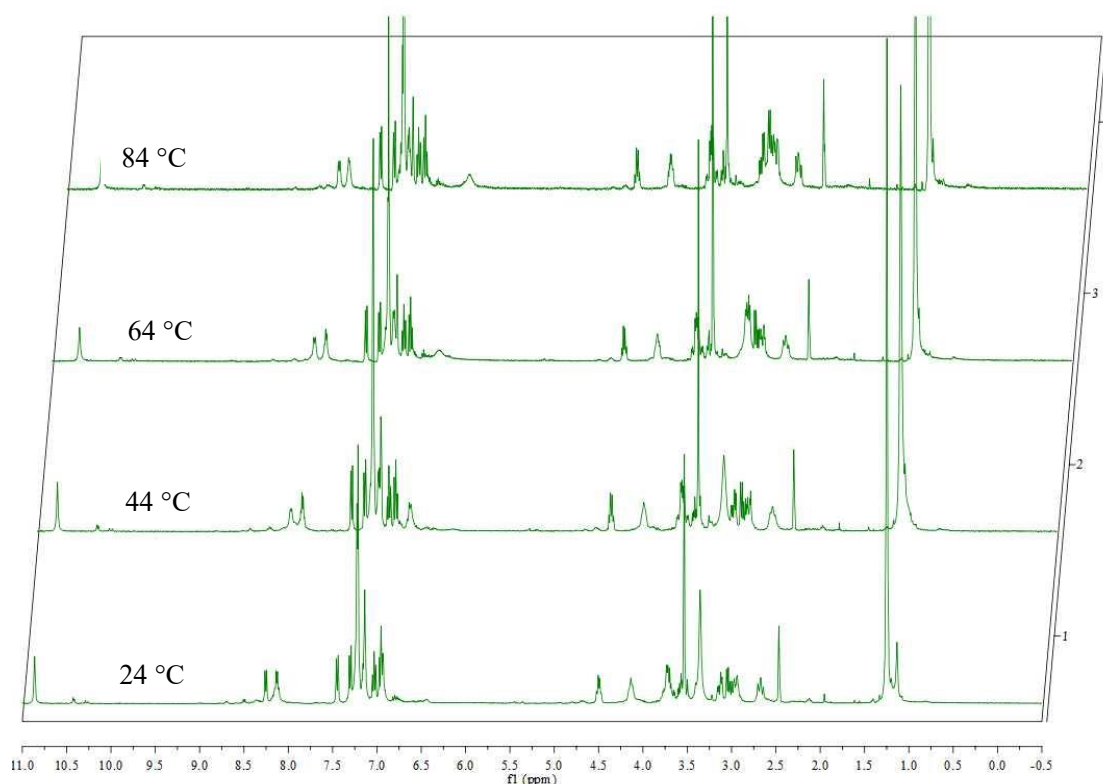

Variable temperature <sup>1</sup>H NMR (399 Hz, DMSO-d<sub>6</sub>) spectra of compound **3j** to prove the rotamer.

### **Methyl N-(*tert*-butoxycarbonyl)-*L*-phenylalanylglycyl-S-trityl-*L*-cysteinate**

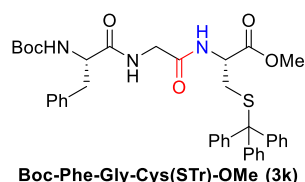

**3k** was obtained in 43% yield as yellow solid (**mixture of two rotamers**). Purification by EtOAc/Hexane = 80%/20%

<sup>1</sup>H NMR 44 °C (399 MHz, DMSO-d<sub>6</sub>) δ 8.23 (s, 1H), 8.08 – 7.99 (m, 1H), 7.57 – 6.92 (m, 20H), 6.80 (s, 1H), 4.26 – 4.11 (m, 1H), 4.26 – 4.11 (m, 1H), 3.82 – 3.69 (m, 2H), 3.55 and 3.55 (s, 3H), 3.05 – 2.96 (m, 1H), 2.80 – 2.68 (m, 1H), 2.59 – 2.50 (m, 1H), 2.44 (dd, *J* = 12.4, 5.6 Hz, 1H), 1.27 (s, 9H).

<sup>13</sup>C NMR (100 MHz, DMSO-d<sub>6</sub>) δ 172.4 and 172.4 (1C), 170.9 and 170.9 (1C), 169.2 and 169.1 (1C), 155.7 and 155.7 (1C), 148.2, 144.4, 138.7, 129.6, 129.5, 128.5, 128.4, 128.2, 127.9, 127.3, 127.0, 126.5, 81.0 and 78.4 (1C), 66.8 and 66.8 (1C), 56.2 and 56.1 (1C), 52.7 and 52.6 (1C), 51.8 and 51.8 (1C), 42.0, 37.9 and 37.8 (1C), 33.3 and 33.2 (1C), 28.5 and 28.2 (3C).

**HRMS** (ESI) *m/z*: Calcd for [M+H]<sup>+</sup> 704.2765; Found: 704.2770

**FT-IR** (neat): 3298, 1745, 1651, 1519, 1443, 1366, 1170, 751, 700  $\text{cm}^{-1}$

$[\alpha]_D^{27}$  14.09 (c 1.1  $\text{CHCl}_3$ )

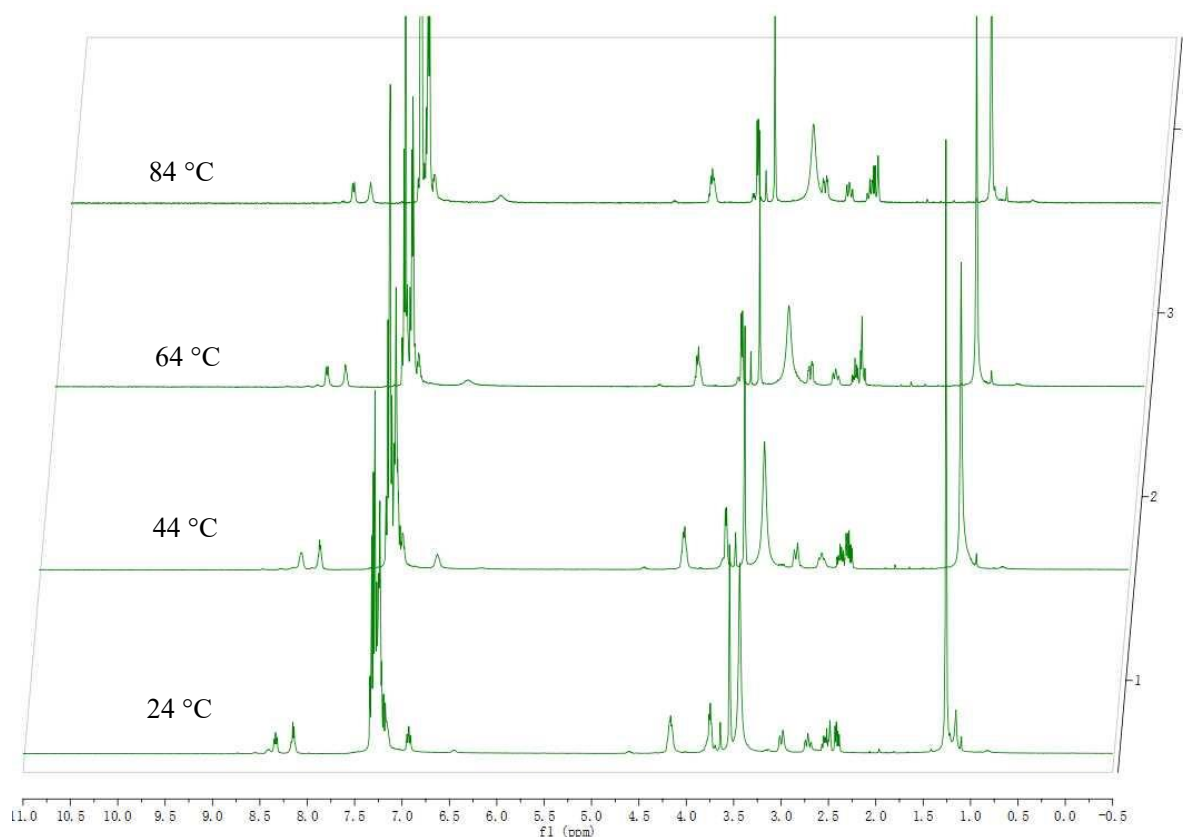

Variable temperature  $^1\text{H}$  NMR (399 Hz,  $\text{DMSO-d}_6$ ) spectra of compound **3k** to prove the rotamer.

**Methyl N<sup>6</sup>-(tert-butoxycarbonyl)-N<sup>2</sup>-(tert-butoxycarbonyl)-L-phenylalanylglycyl-L-lysinate**

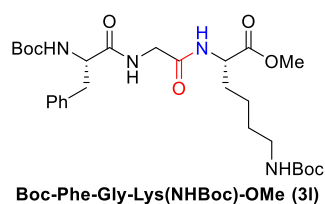

**3l** was obtained in 53% yield as yellow solid (**mixture of two rotamers**). Purification by EtOAc/Hexane = 66%/34%

$^1\text{H}$  NMR (399 MHz,  $\text{DMSO-d}_6$ )  $\delta$  8.20 – 8.07 (m, 1H), 8.20 – 8.07 (m, 1H), 7.31 – 7.09 (m, 5H), 7.00 – 6.90 (m, 1H), 6.75 (s, 1H), 4.27 – 4.08 (m, 1H), 4.27 – 4.08 (m, 1H), 3.82 – 3.69 (m, 2H), 3.61 and 3.60 (s, 3H), 3.04 – 2.94 (m, 1H), 2.92 – 2.80 (m, 1H), 2.92 – 2.80 (m, 1H), 2.76 – 2.66 (m, 1H), 1.74 – 1.52 (m, 2H), 1.35 (s, 9H), 1.51 – 0.97 (m, 2H), 1.51 – 0.97 (m, 2H), 1.27 (s, 9H).

<sup>13</sup>C NMR (100 MHz, DMSO-d<sub>6</sub>) δ 172.9 and 172.8 (1C), 172.4, 169.3 and 169.2 (1C), 156.0, 155.8 and 155.7 (1C), 138.7 and 138.6 (1C), 129.6 (2C), 128.4 (2C), 126.5, 78.5 and 78.5 (1C), 77.8, 56.2 and 56.1 (1C), 52.3, 52.2, 42.1, 37.8, 31.1 and 31.1 (1C), 29.5, 28.7 (3C), 28.5 (3C), 28.2, 23.0 and 23.0 (1C).

HRMS (ESI) m/z: Calcd for [M+Na]<sup>+</sup> 587.3051; Found: 587.3057.

FT-IR (neat): 3315, 2978, 1687, 1524, 1455, 1366, 1251, 1220, 1171, 772 cm<sup>-1</sup>

[α]<sub>D</sub><sup>27</sup> -0.83 (c 2.3 CHCl<sub>3</sub>)

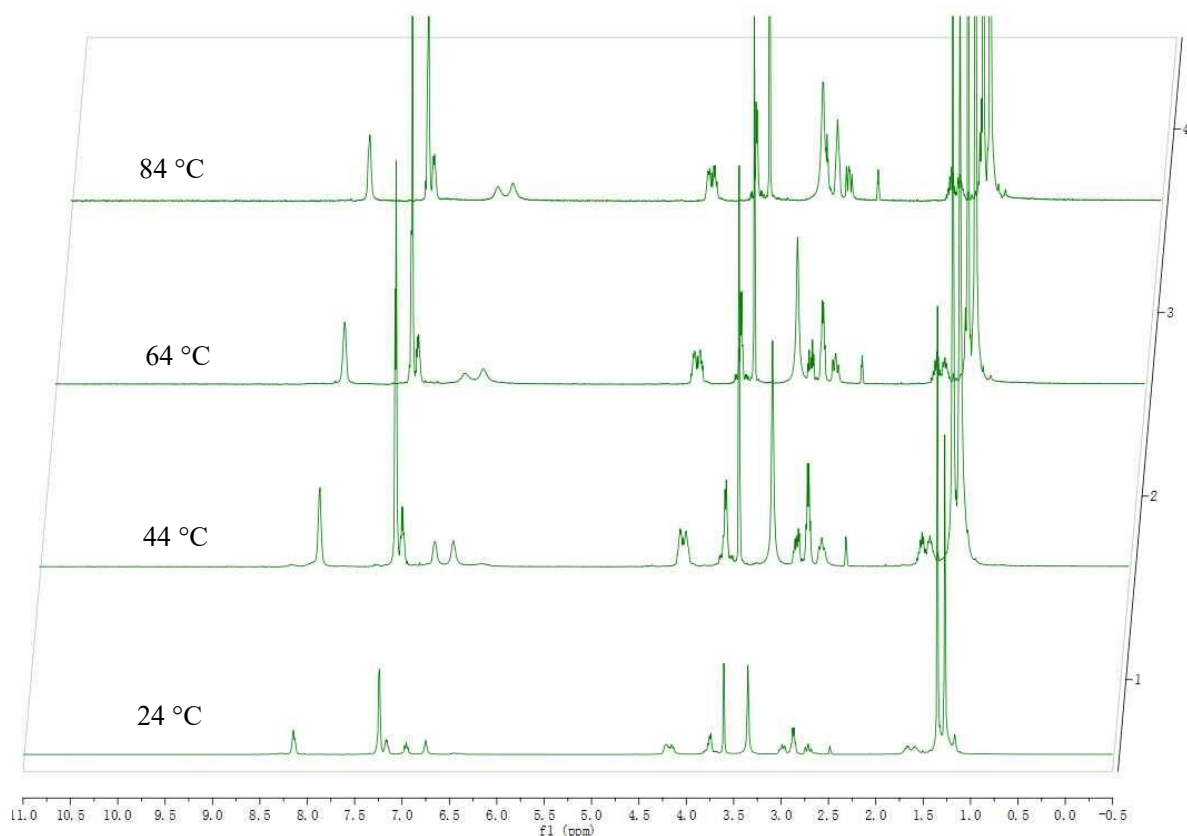

Variable temperature <sup>1</sup>H NMR (399 Hz, DMSO-d<sub>6</sub>) spectra of compound **3I** to prove the rotamer.

### Methyl N<sup>α</sup>-(*tert*-butoxycarbonyl)-*L*-phenylalanylglycyl-N<sup>τ</sup>-trityl-*L*-histidinate

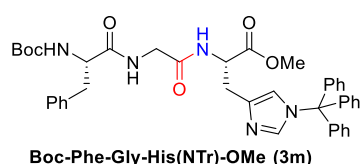

**3m** was obtained in 49% yield as yellow solid. Purification method: EtOAc/Hexane = 99%/1% was used at first to remove some impurities, then MeOH was used as eluent to flush the column and collect the MeOH eluent. Next, the collected MeOH eluent was concentrated under reduced

pressure. The obtained residue was then purified by DCM/MeOH=94/6.

**<sup>1</sup>H NMR** (399 MHz, DMSO-d<sub>6</sub>) δ 8.25 (d, *J* = 7.5 Hz, 1H), 8.19 (s, 1H), 7.47 – 6.99 (m, 20H), 6.94 (d, *J* = 8.5 Hz, 1H), 6.66 (s, 1H), 4.55 – 4.45 (m, 1H), 4.24 – 4.13 (m, 1H), 3.71 (d, *J* = 4.0 Hz, 2H), 3.53 (s, 3H), 3.02 (d, *J* = 12.3 Hz, 1H), 2.89 – 2.75 (m, 2H), 2.75 – 2.66 (m, 1H), 1.24 (s, 9H).

**<sup>13</sup>C NMR** (100 MHz, DMSO-d<sub>6</sub>) δ 172.5, 172.2, 169.0, 155.7, 142.6, 138.7, 138.3, 136.6, 129.6, 129.6, 128.6, 128.4, 128.4, 126.5, 119.7, 78.4, 74.9, 56.1, 52.7, 52.3, 42.2, 37.9, 30.4, 28.5 (3C).

**HRMS** (ESI) *m/z*: Calcd for [M+H]<sup>+</sup> 716.3443; Found: 716.3446.

**FT-IR** (neat): 3312, 1670, 1495, 1445, 1366, 1170, 1022, 750, 701, 662 cm<sup>-1</sup>

[α]<sub>D</sub><sup>29</sup> -0.82 (c 1.6 CHCl<sub>3</sub>)

**Methyl N<sup>2</sup>-(*tert*-butoxycarbonyl)-*L*-phenylalanylglycyl-N<sup>ω</sup>-((2,2,4,6,7-pentamethyl-2,3-dihydrobenzofuran-5-yl)sulfonyl)-*L*-argininate**

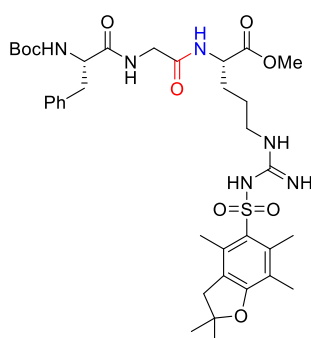

**Boc-Phe-Gly-Arg(Pbf)-OMe (3n)**

**3n** was obtained in 44% yield as yellow solid (**mixture of two rotamers**). Purification by EtOAc/Hexane = 99%/1%

**<sup>1</sup>H NMR** 64 °C (399 MHz, DMSO-d<sub>6</sub>) δ 8.06 – 7.89 (m, 1H), 8.05 – 7.89 (m, 1H), 7.28 – 7.11 (m, 5H), 6.74 – 6.59 (brs, 2H), 6.51 – 6.39 (brs, 2H), 4.30 – 4.23 (m, 1H), 4.22 – 4.15 (m, 1H), 3.76 (d, *J* = 5.6 Hz, 2H), 3.61 (s, 3H), 3.08 – 2.99 (m, 1H), 3.08 – 2.99 (m, 1H), 3.08 – 2.99 (m, 1H), 2.94 (s, 2H), 2.75 (dd, *J* = 13.6, 10.0 Hz, 1H), 2.49 (s, 3H), 2.43 (s, 3H), 2.01 (s, 3H), 1.77 – 1.65 (m, 1H), 1.63 – 1.53 (m, 1H), 1.49 – 1.36 (m, 2H), 1.40 (s, 3H), 1.40 (s, 3H), 1.28 (s, 9H).

**<sup>13</sup>C NMR** (100 MHz, DMSO-d<sub>6</sub>) δ 172.7, 172.4, 169.2, 157.9, 156.5, 155.7, 138.7, 137.7, 134.6, 131.9, 129.6 (2C), 128.4 (2C), 126.6, 124.8, 116.7, 86.7, 78.5, 56.1, 52.3, 52.1, 42.9, 42.1, 37.8, 28.8, 28.7 (2C), 28.6 (3C), 28.2, 25.9, 19.4, 18.0, 12.7.

**HRMS** (ESI) *m/z*: Calcd for [M+Na]<sup>+</sup> 767.3409; Found: 767.3409.

**FT-IR** (neat): 3330, 2976, 2360, 1662, 1550, 1250, 1166, 1106, 755, 663 cm<sup>-1</sup>

[α]<sub>D</sub><sup>27</sup> 10.12 (c 1.5 CHCl<sub>3</sub>)

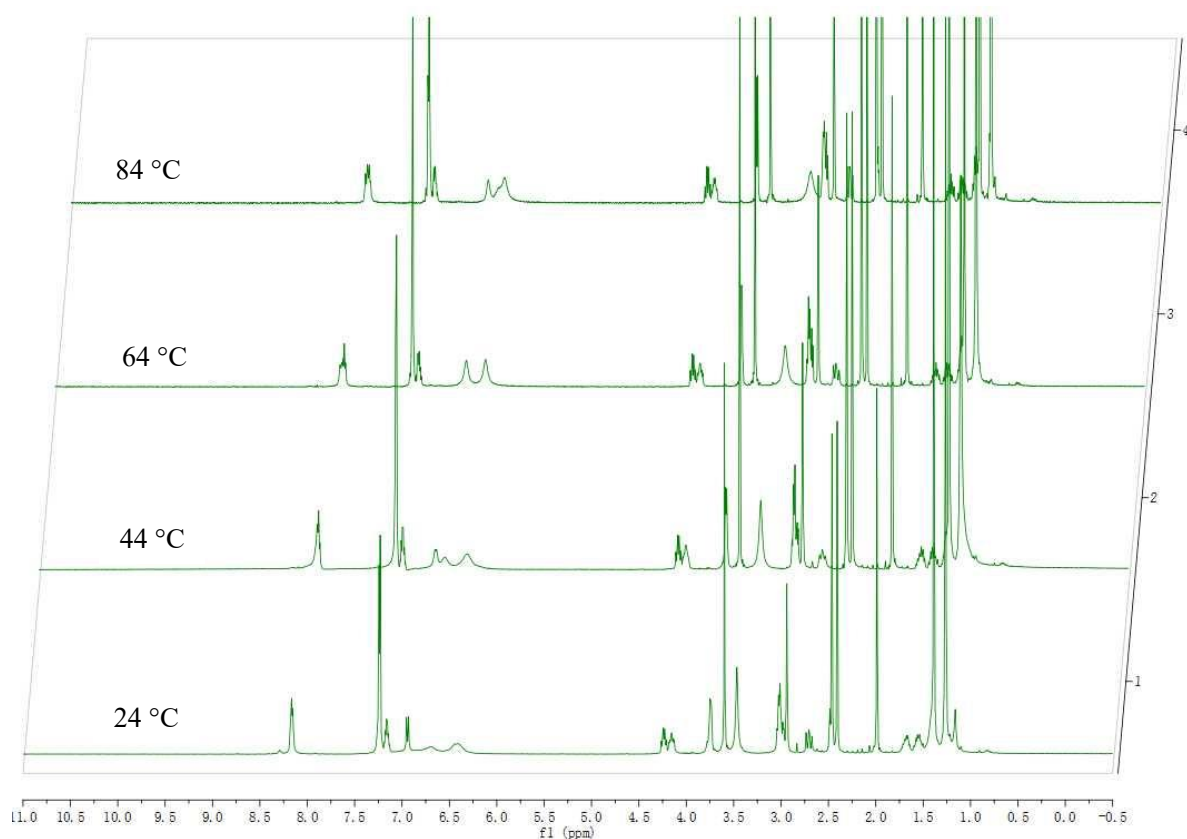

Variable temperature  $^1\text{H}$  NMR (399 Hz, DMSO- $d_6$ ) spectra of compound **3n** to prove the rotamer.

### **Methyl ((benzyloxy)carbonyl)-*L*-leucylglycyl-*L*-phenylalaninate**

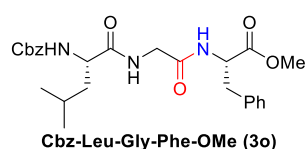

**3o** was obtained in 57% yield as yellow solid. Purification by EtOAc/Hexane = 60%/40%

$^1\text{H}$  NMR (399 MHz,  $\text{CDCl}_3$ )  $\delta$  7.38 – 7.17 (m, 8H), 7.14 – 7.04 (m, 2H), 6.99 – 6.90 (m, 1H), 6.85 (d,  $J$  = 7.2 Hz, 1H), 5.35 (d,  $J$  = 7.7 Hz, 1H), 5.14 – 4.97 (m, 2H), 4.83 (dd,  $J$  = 13.9, 6.3 Hz, 1H), 4.25 – 4.14 (m, 1H), 4.01 (dd,  $J$  = 17.0, 5.5 Hz, 1H), 3.81 (dd,  $J$  = 16.7, 4.6 Hz, 1H), 3.67 (s, 3H), 3.12 (dd,  $J$  = 13.8, 5.9 Hz, 1H), 3.05 (dd,  $J$  = 13.8, 6.5 Hz, 1H), 1.71 – 1.56 (m, 2H), 1.56 – 1.43 (m, 1H), 0.92 (d,  $J$  = 5.6 Hz, 6H).

$^{13}\text{C}$  NMR (100 MHz,  $\text{CDCl}_3$ )  $\delta$  172.7, 171.7, 168.3, 156.3, 136.0, 135.7, 129.2 (2C), 128.6 (2C), 128.5 (2C), 128.2, 128.0 (2C), 127.1, 67.1, 53.4, 52.3, 42.9, 41.2, 37.8, 29.7, 24.6, 22.9, 21.8.

**HRMS** (ESI)  $m/z$ : Calcd for  $[\text{M}+\text{Na}]^+$  506.2262; Found: 506.2261.

**FT-IR** (neat): 3303, 2956, 1658, 1531, 1455, 1218, 1043, 910, 733, 699  $\text{cm}^{-1}$

$[\alpha]_D^{29}$  22.21 (c 1.8 CHCl<sub>3</sub>)

**Methyl ((benzyloxy)carbonyl)-L-leucylglycyl-L-methioninate**

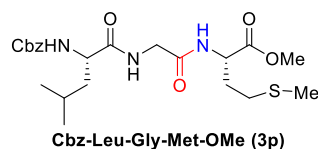

**3p** was obtained in 43% yield as yellow solid. Purification by EtOAc/Hexane = 50%/50%

**<sup>1</sup>H NMR** (399 MHz, CDCl<sub>3</sub>)  $\delta$  7.37 – 7.26 (m, 5H), 7.25 – 7.00 (m, 2H), 5.58 (s, 1H), 5.15 – 4.99 (m, 2H), 4.72 – 4.63 (m, 1H), 4.25 – 4.15 (m, 1H), 4.10 (dd,  $J$  = 16.8, 5.4 Hz, 1H), 3.87 (dd,  $J$  = 16.8, 4.9 Hz, 1H), 3.69 (s, 3H), 2.57 – 2.42 (m, 2H), 2.21 – 2.09 (m, 1H), 2.05 (s, 3H), 1.98 (dt,  $J$  = 21.3, 7.2 Hz, 1H), 1.73 – 1.59 (m, 2H), 1.58 – 1.46 (m, 1H), 0.97 – 0.83 (m, 6H).

**<sup>13</sup>C NMR** (100 MHz, CDCl<sub>3</sub>)  $\delta$  173.0, 172.2, 168.9, 156.4, 136.0, 128.5 (2C), 128.2, 128.0 (2C), 67.1, 53.8, 52.5, 51.5, 43.1, 41.1, 31.3, 29.9, 24.6, 22.9, 21.8, 15.4.

**HRMS** (ESI)  $m/z$ : Calcd for [M+Na]<sup>+</sup> 490.1982; Found: 490.1982.

**FT-IR** (neat): 3301, 2956, 1660, 1536, 1439, 1238, 1172, 1121, 1042, 735, 698 cm<sup>-1</sup>

$[\alpha]_D^{28}$  11.58 (c 3.0 CHCl<sub>3</sub>)

**Methyl ((benzyloxy)carbonyl)-L-leucylglycyl-L-tryptophanate**

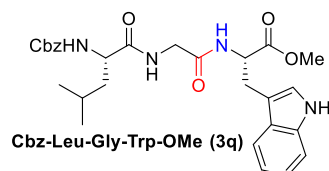

**3q** was obtained in 62% yield as yellow solid. Purification by EtOAc/Hexane = 60%/40%

**<sup>1</sup>H NMR** (399 MHz, CDCl<sub>3</sub>)  $\delta$  8.69 (s, 1H), 7.44 (d,  $J$  = 7.7 Hz, 1H), 7.33 – 7.21 (m, 6H), 7.18 – 7.07 (m, 3H), 7.07 – 7.00 (m, 1H), 6.93 (s, 1H), 5.58 (d,  $J$  = 6.9 Hz, 1H), 5.04 (t,  $J$  = 11.4 Hz, 1H), 4.90 (d,  $J$  = 12.3 Hz, 1H), 4.82 (dd,  $J$  = 12.9, 5.8 Hz, 1H), 4.23 – 4.11 (m, 1H), 3.86 (dd,  $J$  = 16.7, 5.4 Hz, 1H), 3.68 (dd,  $J$  = 16.3, 4.7 Hz, 1H), 3.57 (s, 3H), 3.28 – 3.18 (m, 2H), 1.67 – 1.49 (m, 2H), 1.46 – 1.36 (m, 1H), 0.94 – 0.73 (m, 6H).

**<sup>13</sup>C NMR** (100 MHz, CDCl<sub>3</sub>)  $\delta$  173.2, 172.2, 168.8, 156.5, 136.0, 136.0, 128.5 (2C), 128.1, 127.9 (2C), 127.2, 123.5, 121.9, 119.3, 118.2, 111.4, 109.2, 67.1, 53.6, 52.7, 52.4, 42.8, 41.1, 27.2, 24.6, 22.9, 21.7.

**HRMS** (ESI)  $m/z$ : Calcd for [M+Na]<sup>+</sup> 545.2371; Found: 545.2365

**FT-IR** (neat): 3311, 2956, 1659, 1530, 1439, 1251, 1043, 910, 735 cm<sup>-1</sup>

$[\alpha]_D^{29}$  22.28 (c 3.6 CHCl<sub>3</sub>)

**Methyl N<sup>2</sup>-O-benzyl-N-(*tert*-butoxycarbonyl)-L-serylglycyl-N<sup>6</sup>-(*tert*-butoxycarbonyl)-L-lysinate**

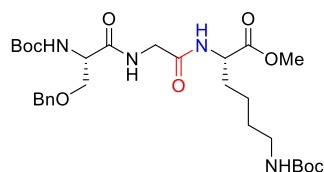

**Boc-Ser(OBn)-Gly-Lys(NHBoc)-OMe (3r)**

**3r** was obtained in 45% yield as yellow solid (**mixture of two rotamers**). Purification by EtOAc/Hexane = 66%/34%

**<sup>1</sup>H NMR** (399 MHz, DMSO-d<sub>6</sub>) δ 8.23 – 8.12 (m, 1H), 8.12 – 8.01 (m, 1H), 7.39 – 7.17 (m, 5H), 6.96 (t, *J* = 7.4 Hz, 1H), 6.74 (t, *J* = 5.1 Hz, 1H), 4.47 (s, 2H), 4.30 – 4.14 (m, 1H), 4.31 – 4.14 (m, 1H), 3.81 – 3.69 (m, 2H), 3.67 – 3.48 (m, 2H), 3.60 and 3.59 (s, 3H), 2.92 – 2.79 (m, 2H), 1.72 – 1.60 (m, 1H), 1.59 – 1.48 (m, 1H), 1.37 (s, 9H), 1.35 (s, 9H), 1.47 – 1.06 (m, 2H), 1.47 – 1.05 (m, 2H).

**<sup>13</sup>C NMR** (100 MHz, DMSO-d<sub>6</sub>) δ 172.8 and 172.8 (1C), 170.6 and 170.5 (1C), 169.2 and 169.1 (1C), 156.0, 155.9 and 155.8 (1C), 138.6 and 138.6 (1C), 128.6 (2C), 127.9 and 127.8 (2C), 127.8, 78.8 and 78.8 (1C), 77.7, 72.3, 70.2 and 70.2 (1C), 54.8 and 54.7 (1C), 52.3, 52.2, 42.2, 31.1 and 31.0 (1C), 29.4, 28.7 (3C), 28.6 (3C), 23.0 and 23.0 (1C).

**HRMS** (ESI) *m/z*: Calcd for [M+Na]<sup>+</sup> 617.3157; Found: 617.3160.

**FT-IR** (neat): 3326, 2978, 1686, 1525, 1366, 1250, 1170, 752, 699 cm<sup>-1</sup>

[α]<sub>D</sub><sup>26</sup> 5.69 (c 1.8 CHCl<sub>3</sub>)

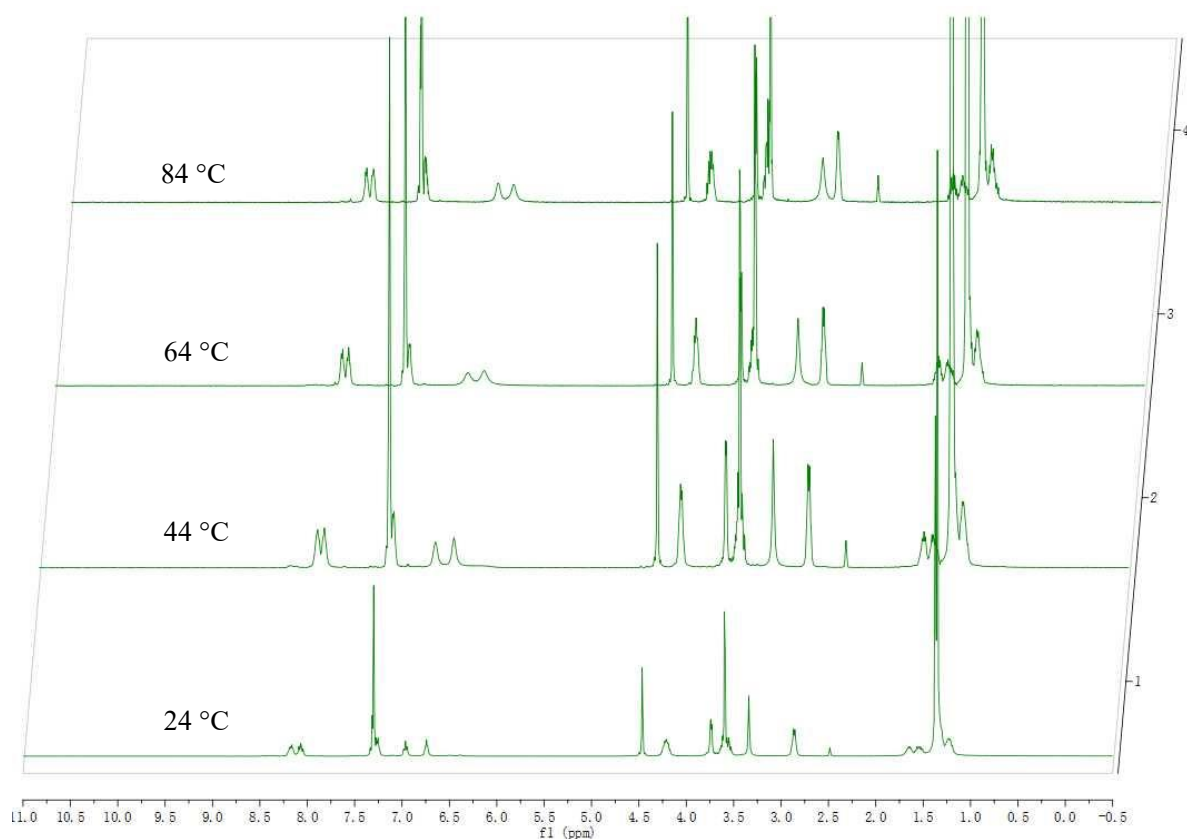

Variable temperature  $^1\text{H}$  NMR (399 Hz,  $\text{DMSO-d}_6$ ) spectra of compound **3r** to prove the rotamer.

**tert-Butyl (tert-butoxycarbonyl)-L-phenylalanylglycyl-L-leucyl-L-phenylalaninate**

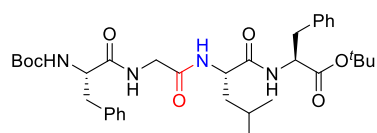

**Boc-Phe-Gly-Leu-Phe-OBu (3s)**

**3s** was obtained in 67% yield as yellow solid. Purification by EtOAc/Hexane = 50%/50%

$^1\text{H}$  NMR (399 MHz,  $\text{DMSO-d}_6$ )  $\delta$  8.33 – 8.19 (m, 1H), 8.16 – 8.04 (m, 1H), 7.86 – 7.77 (m, 1H), 7.38 – 7.08 (m, 10H), 6.95 (dd,  $J$  = 15.3, 8.3 Hz, 1H), 4.39 – 4.24 (m, 2H), 4.13 (dd,  $J$  = 12.5, 6.2 Hz, 1H), 3.69 (s, 2H), 3.04 – 2.83 (m, 3H), 2.69 (dd,  $J$  = 13.6, 10.7 Hz, 1H), 1.54 (dd,  $J$  = 13.3, 6.7 Hz, 1H), 1.48 – 1.34 (m, 2H), 1.26 (s, 9H), 1.25 (s, 9H), 0.84 (d,  $J$  = 6.5 Hz, 3H), 0.81 (d,  $J$  = 6.5 Hz, 3H).

$^{13}\text{C}$  NMR (100 MHz,  $\text{DMSO-d}_6$ )  $\delta$  172.4, 172.3, 170.7, 168.7, 155.7, 138.7, 137.6, 129.6(4C), 128.6 (2C), 128.4 (2C), 126.9, 126.6, 80.9, 78.5, 56.2, 54.6, 50.9, 42.4, 41.6, 37.8, 37.1, 28.6 (3C), 27.9 (3C), 24.5, 23.5, 22.1.

HRMS (ESI)  $m/z$ : Calcd for  $[\text{M}+\text{Na}]^+$  661.3572; Found: 661.3570

FT-IR (neat): 3292, 2976, 1641, 1541, 1455, 1367, 1251, 1159, 1048, 910, 851, 734, 699  $\text{cm}^{-1}$

$[\alpha]_D^{28}$  10.39 (c 2.6 CHCl<sub>3</sub>)

**tert-Butyl ((benzyloxy)carbonyl)-L-leucylglycyl-L-leucyl-L-phenylalaninate**

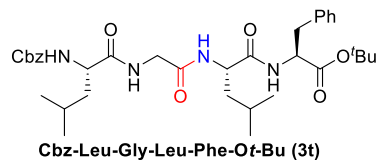

**3t** was obtained in 47% yield as yellow solid. Purification by EtOAc/Hexane = 60%/40%

**<sup>1</sup>H NMR** (399 MHz, CDCl<sub>3</sub>)  $\delta$  7.39 – 7.26 (m, 4H), 7.24 – 7.09 (m, 5H), 7.03 (s, 1H), 6.94 (s, 1H), 5.69 (d,  $J$  = 6.6 Hz, 1H), 5.10 (d,  $J$  = 12.2 Hz, 1H), 4.98 (d,  $J$  = 12.2 Hz, 1H), 4.71 (dd,  $J$  = 14.2, 6.5 Hz, 1H), 4.59 – 4.46 (m, 1H), 4.22 (s, 1H), 4.01 (d,  $J$  = 12.8 Hz, 1H), 3.84 (d,  $J$  = 15.2 Hz, 1H), 3.10 – 2.92 (m, 2H), 1.75 – 1.43 (m, 6H), 1.34 (s, 9H), 1.10 – 0.62 (m, 12H).

**<sup>13</sup>C NMR** (100 MHz, CDCl<sub>3</sub>)  $\delta$  173.1, 171.6, 170.6, 168.8, 156.5, 136.2, 136.0, 129.5, 128.5, 128.2, 128.2, 128.0, 126.8, 82.4, 67.1, 53.8, 53.6, 51.9, 43.1, 41.2, 41.0, 38.1, 27.9 (3C), 24.7(2C), 22.9, 22.8, 22.0(2C).

**HRMS** (ESI)  $m/z$ : Calcd for [M+Na]<sup>+</sup> 661.3572; Found: 661.3573.

**FT-IR** (neat): 3286, 2956, 1639, 1539, 1368, 1233, 1155, 732, 697 cm<sup>-1</sup>

$[\alpha]_D^{27}$  14.55 (c 0.9 CHCl<sub>3</sub>)

**Methyl (tert-butoxycarbonyl)-L-phenylalanyl-L-leucylglycyl-L-phenylalaninate**

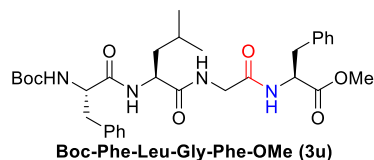

**3u** was obtained in 50% yield as yellow solid (**mixture of two rotamers**). Purification by EtOAc/Hexane = 75%/25%

**<sup>1</sup>H NMR** (399 MHz, DMSO-d<sub>6</sub>)  $\delta$  (8.23 (d,  $J$  = 7.6 Hz) and 8.20 (d,  $J$  = 7.6 Hz), 1H), 8.11 – 8.04 (m, 1H), 8.02 – 7.89 (m, 1H), 7.39 – 7.01 (m, 10H), (6.95 (d,  $J$  = 7.2 Hz) and 6.90 (d,  $J$  = 8.4 Hz), 1H), 4.49 – 4.39 (m, 1H), 4.34 – 4.08 (m, 2H), 3.76 – 3.60 (m, 2H), 3.54 (s, 3H), 3.02 – 2.82 (m, 3H), 2.77 – 2.65 (m, 1H), 1.72 – 1.53 (m, 1H), 1.40 (ddd,  $J$  = 14.7, 10.1, 3.5 Hz, 2H), 1.26 and 1.26 (s, 9H), (0.84 (d,  $J$  = 6.4 Hz) and 0.76 (d,  $J$  = 6.4 Hz), 3H), (0.80 (d,  $J$  = 6.4 Hz) and 0.70 (d,  $J$  = 6.4 Hz), 3H).

**<sup>13</sup>C NMR** (100 MHz, DMSO-d<sub>6</sub>)  $\delta$  172.6, 172.2 and 172.2 (1C), 172.0, 169.1 and 169.0 (1C), 155.8 and 155.7 (1C), 138.5 and 138.1 (1C), 137.4, 129.6 (2C), 129.5 (2C), 128.7 (2C), 128.4 (2C), 127.0, 126.6 and 126.5 (1C), 78.7 and 78.5 (1C), 56.4 and 56.1 (1C), 54.1 and 54.0 (1C),

52.3, 51.4 and 51.4 (1C), 41.9, 41.4 and 41.0 (1C), 37.9 and 37.5 (1C), 37.3, 28.5 and 28.5 (3C), 24.3 and 24.3 (1C), 23.6 and 23.5 (1C), 22.0 and 21.7 (1C).

**HRMS** (ESI)  $m/z$ : Calcd for  $[M+Na]^+$  619.3102; Found: 619.3096

**FT-IR** (neat): 3287, 2956, 1642, 1528, 1455, 1367, 1250, 1171, 1030, 911, 734, 700  $\text{cm}^{-1}$

$[\alpha]_D^{23}$  15.10 (c 0.7  $\text{CHCl}_3$ )

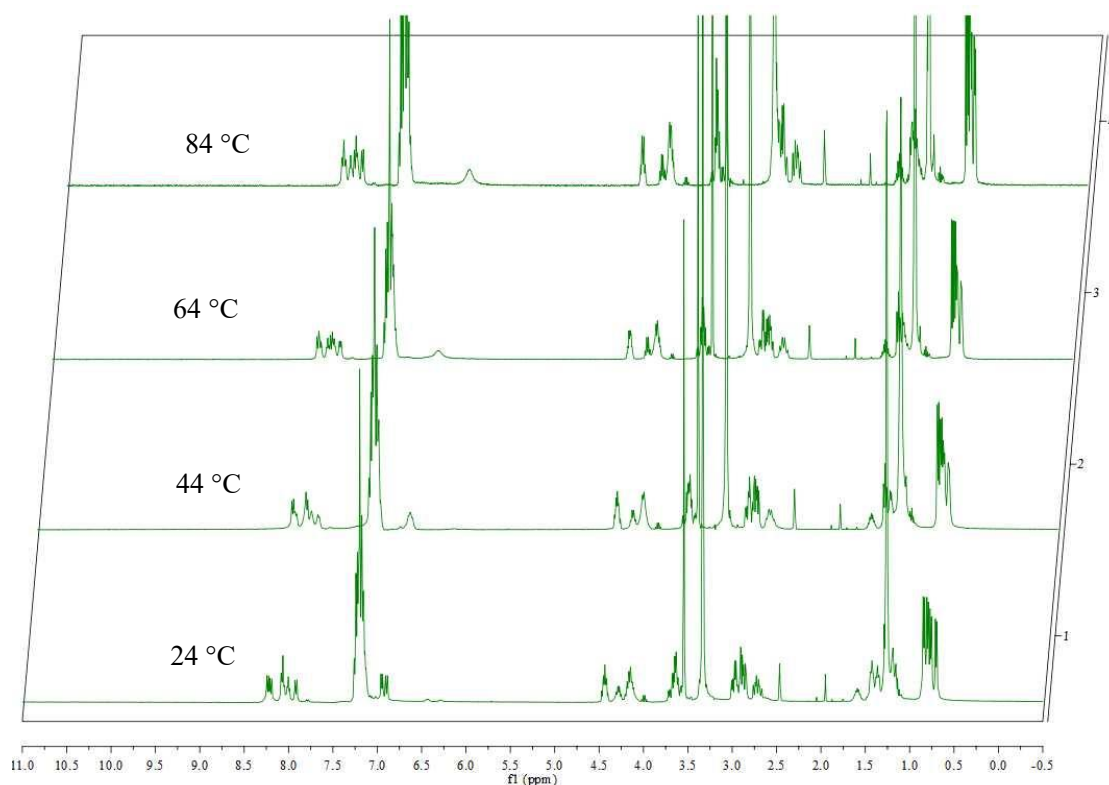

Variable temperature  $^1\text{H}$  NMR (399 Hz,  $\text{DMSO-d}_6$ ) spectra of compound **3u** to prove the rotamer.

### **Methyl (*tert*-butoxycarbonyl)-*L*-phenylalanyl-*L*-leucylglycyl-*L*-isoleucinate**

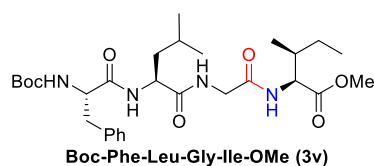

**3v** was obtained in 53% yield as yellow solid (**mixture of two rotamers**). Purification by EtOAc/Hexane = 70%/30%

$^1\text{H}$  NMR (399 MHz,  $\text{DMSO-d}_6$ )  $\delta$  8.13 – 7.85 (m, 1H), 8.15 – 7.86 (m, 1H), 8.13 – 7.85 (m, 1H), 7.33 – 7.06 (m, 5H), (6.92 (d,  $J = 7.2$  Hz) and 6.86 (d,  $J = 8.4$  Hz), 1H), 4.39 – 4.25 (m, 1H), 4.23 – 4.06 (m, 1H), 4.23 – 4.06 (m, 1H), 3.82 – 3.64 (m, 2H), 3.59 (s, 3H), 2.97 – 2.83

(m, 1H), 2.78 – 2.65 (m, 1H), 1.79 – 1.67 (m, 1H), 1.65 – 1.53 (m, 1H), 1.27 and 1.26 (s, 9H), 1.51 – 1.01 (m, 4H), 0.97 – 0.44 (m, 12H).

**<sup>13</sup>C NMR** (100 MHz, DMSO-*d*<sub>6</sub>) δ 172.7 and 172.6 (1C), 172.3, 172.0 and 172.0 (1C), 169.2 and 169.2 (1C), 155.7 and 155.6 (1C), 138.5 and 138.0 (1C), 129.6 (2C), 128.4 (2C), 126.6 and 126.5 (1C), 78.6 and 78.5 (1C), 56.7, 56.4 and 56.1 (1C), 52.1, 51.4, 42.1, 41.5 and 41.0 (1C), 37.9 and 37.5 (1C), 36.9 and 36.8 (1C), 28.5 and 28.5 (3C), 25.1, 24.3 and 24.3 (1C), 23.5, 21.9 and 21.7 (1C), 15.8 and 15.8 (1C), 11.5 and 11.5 (1C).

**HRMS** (ESI) *m/z*: Calcd for [M+Na]<sup>+</sup> 585.3259; Found: 585.3254

**FT-IR** (neat): 3289, 2961, 1646, 1530, 1367, 1251, 1170, 911, 734 cm<sup>-1</sup>

[α]<sub>D</sub><sup>26</sup> 2.47 (c 0.8 CHCl<sub>3</sub>)

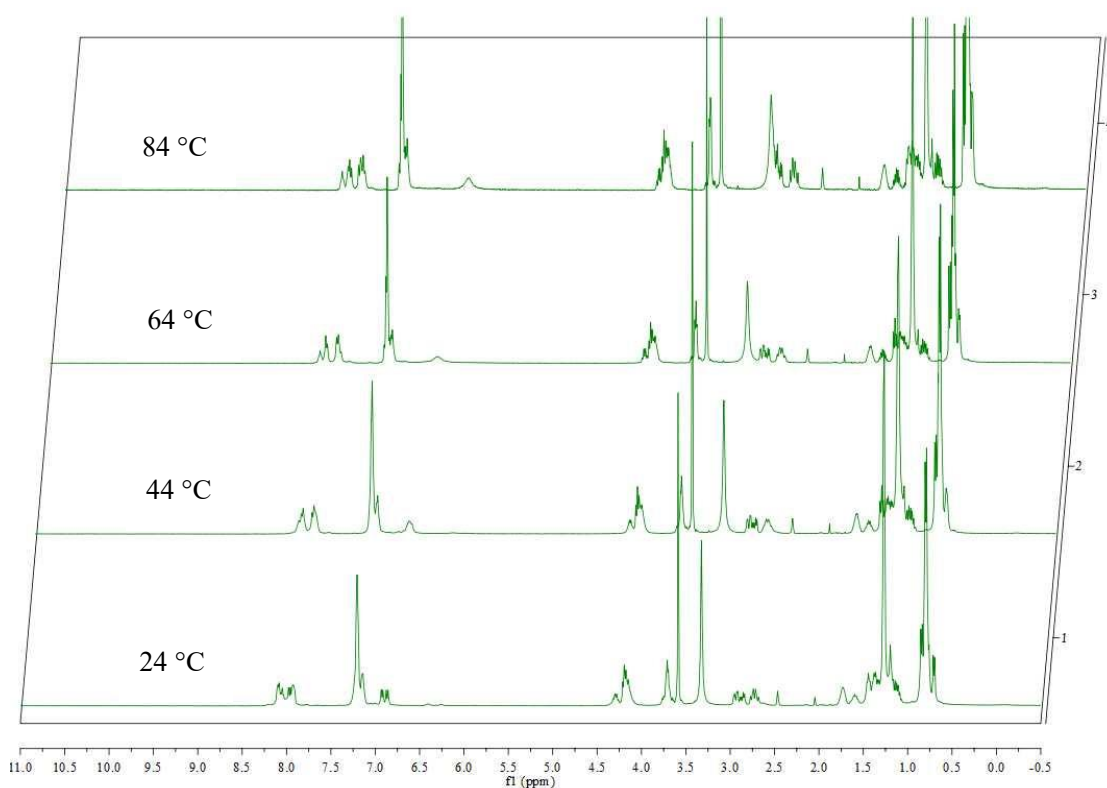

Variable temperature **<sup>1</sup>H NMR** (399 Hz, DMSO-*d*<sub>6</sub>) spectra of compound **3v** to prove the rotamer.

**Methyl (*tert*-butoxycarbonyl)-*L*-phenylalanyl-*L*-leucylglycyl-*L*-tyrosinate**

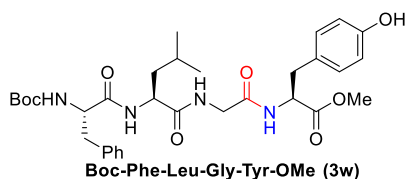

**3w** was obtained in 51% yield as yellow solid (**mixture of two rotamers**). Purification by EtOAc/Hexane = 70%/30%

**<sup>1</sup>H NMR** (399 MHz, DMSO-*d*<sub>6</sub>) δ 9.97 and 9.21 (s, 1H), 8.24 – 8.04 (m, 1H), 8.24 – 8.04 (m, 1H), 8.02 – 7.86 (m, 1H), 7.33 – 7.07 (m, 5H), 7.02 – 6.78 (m, 2H), 7.00 – 6.77 (m, 1H), 6.66 – 6.26 (m, 2H), 4.41 – 4.08 (m, 1H), 4.41 – 4.08 (m, 1H), 4.41 – 4.08 (m, 1H), 3.77 – 3.60 (m, 2H), 3.54 (s, 3H), 2.98 – 2.82 (m, 2H), 2.80 – 2.63 (m, 2H), 1.67 – 1.54 (m, 1H), 1.47 – 1.34 (m, 2H), 1.26 (s, 9H), (0.84 (d, *J* = 6.4 Hz) and 0.76 (d, *J* = 6.4 Hz), 3H), (0.80 (d, *J* = 6.8 Hz) and 0.70 (d, *J* = 6.0 Hz), 3H).

**<sup>13</sup>C NMR** (100 MHz, DMSO-*d*<sub>6</sub>) δ 172.6 and 172.4 (1C), 172.3 and 172.0 (1C), 169.0 and 169.0 (1C), 156.4 and 152.1 (1C), 155.8 and 155.7 (1C), 138.5 and 138.1 (1C), 130.7 and 130.4 (2C), 129.6 and 129.1 (2C), 128.4 (2C), 127.4 and 127.3 (1C), 126.6 and 126.5 (1C), 119.7 and 116.9 (1C), 115.5 (2C), 78.7 and 78.5 (1C), 56.4 and 56.1 (1C), 54.4 and 54.4 (1C), 52.3 and 52.2 (1C), 51.4 and 51.4 (1C), 41.9, 41.4 and 41.0 (1C), 37.9 and 37.5 (1C), 36.6 and 36.1 (1C), 28. and, 28.5 (3C), 24.3 and 24.3 (1C), 23.6 and 23.5 (1C), 21.9 and 21.7 (1C).

**HRMS** (ESI) *m/z*: Calcd for [M+Na]<sup>+</sup> 635.3051; Found: 635.3047.

**FT-IR** (neat): 3296, 2959, 1652, 1517, 1367, 1259, 1170, 910, 801, 735 cm<sup>-1</sup>

[α]<sub>D</sub><sup>20</sup> 16.29 (c 1.6 CHCl<sub>3</sub>)

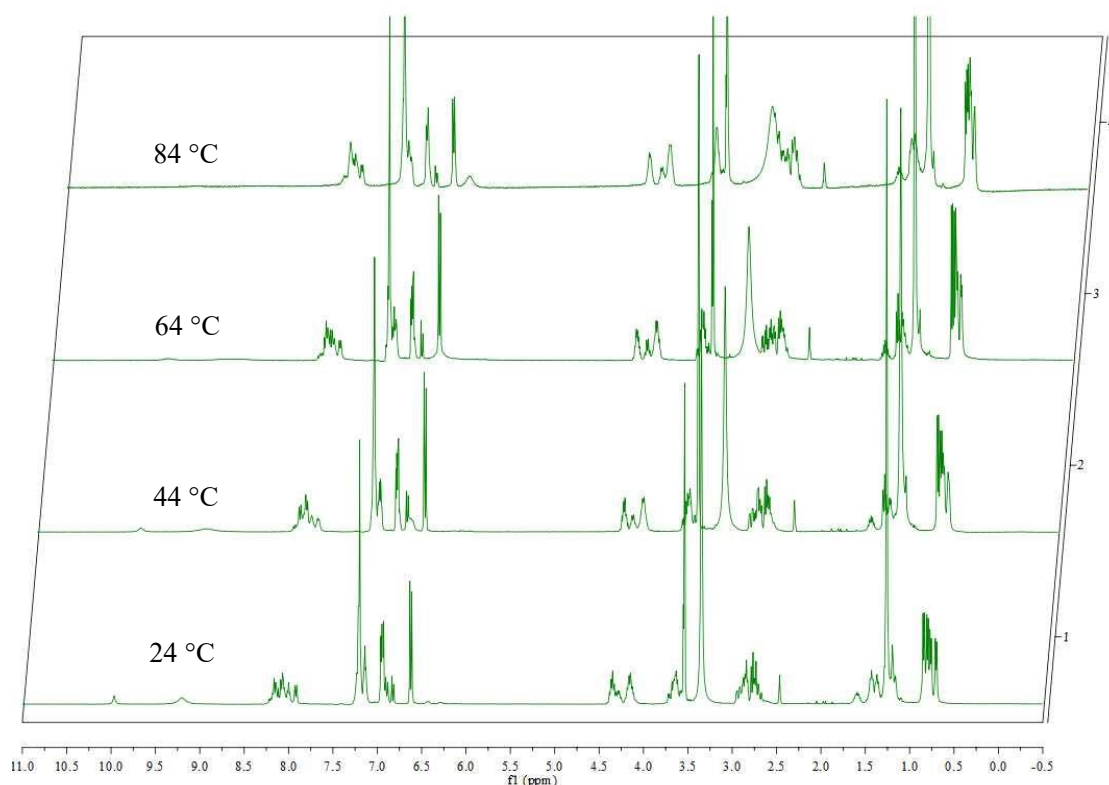

Variable temperature **<sup>1</sup>H NMR** (399 Hz, DMSO-*d*<sub>6</sub>) spectra of compound **3w** to prove the rotamer.

## 2.8 Typical procedure of oxidative peptide synthesis using unprotected amino acid and physical information

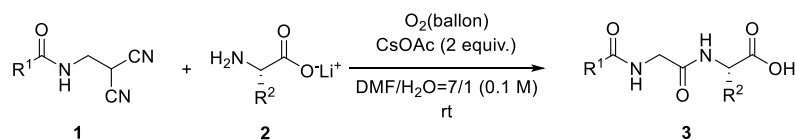

To a mixture of the amino acid lithium salt **2** (0.4 mmol) in DMF/H<sub>2</sub>O=7/1 (2 mL) was added CsOAc (76.8 mg, 0.4 mmol). The mixture was stirred and then was filled with O<sub>2</sub>. The dicyano compound **1** (0.2 mmol) was then added and stirred at room temperature. The mixture was then diluted by EtOAc and quenched with 1N HCl and extracted with EtOAc/<sup>i</sup>BuOH=10/1. The organic phase was dried over Na<sub>2</sub>SO<sub>4</sub> and concentrated using air blower under 80 °C and then concentrated in vacuo. The crude product was purified by silica gel column chromatography, eluted with CH<sub>2</sub>Cl<sub>2</sub>/MeOH containing 0.5% acetic acid.

### (*tert*-Butoxycarbonyl)-*L*-phenylalanylglycyl-*L*-phenylalanine

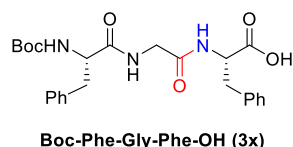

**3x** was obtained in 67% yield as white solid. Purification by CH<sub>2</sub>Cl<sub>2</sub>/MeOH = 91%/9% (0.5% acetic acid was added to the eluent).

**<sup>1</sup>H NMR** (399 MHz, DMSO-*d*<sub>6</sub>) δ 8.18 – 8.02 (m, 2H), 7.34 – 7.06 (m, 10H), 6.95 – 6.83 (m, 1H), 4.47 – 4.35 (m, 1H), 4.19 – 4.07 (m, 1H), 3.81 – 3.55 (m, 2H), 3.02 (dd, *J* = 13.8, 5.0 Hz, 1H), 2.98 – 2.91 (m, 1H), 2.85 (dd, *J* = 13.7, 8.9 Hz, 1H), 2.67 (dd, *J* = 13.3, 10.9 Hz, 1H), 1.25 (s, 9H).

**<sup>13</sup>C NMR** (100 MHz, DMSO-*d*<sub>6</sub>) δ 173.1, 172.3, 169.0, 155.7, 138.7, 137.8, 129.6 (2C), 129.5 (2C), 128.6 (2C), 128.4 (2C), 126.9, 126.5, 78.5, 56.1, 53.9, 42.1, 37.9, 37.3, 28.6 (3C).

**HRMS** (ESI) *m/z*: Calcd for [M+H]<sup>+</sup> 470.2286; Found: 470.2284.

**FT-IR** (neat): 3406, 2499, 2073, 1656, 1456, 1165, 1119, 976, 735, 701 cm<sup>-1</sup>

[α]<sub>D</sub><sup>25</sup> 15.13 (c 1.1 DMSO)

### (*tert*-Butoxycarbonyl)-*L*-phenylalanylglycyl-*L*-leucine

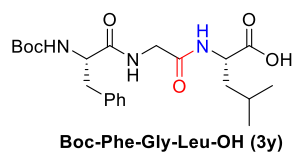

**3y** was obtained in 64% yield as yellow solid (**mixture of two rotamers**). Purification by CH<sub>2</sub>Cl<sub>2</sub>/MeOH = 92%/8% (0.5% acetic acid was added to the eluent).

**<sup>1</sup>H NMR** (399 MHz, DMSO-d<sub>6</sub>) δ 8.13 (t, *J* = 5.6 Hz, 1H), 7.95 (d, *J* = 7.9 Hz, 1H), 7.27 – 7.19 (m, 4H), 7.18 – 7.12 (m, 1H), 6.95 (t, *J* = 8.5 Hz, 1H), 4.26 – 4.09 (m, 2H), 3.80 – 3.69 (m, 2H), 3.02 – 2.92 (m, 1H), 2.69 (dd, *J* = 13.5, 11.0 Hz, 1H), 1.66 – 1.44 (m, 3H), 1.26 (s, 9H), 0.86 (d, *J* = 6.5 Hz, 3H), 0.82 (d, *J* = 6.4 Hz, 3H).

**<sup>13</sup>C NMR** (100 MHz, DMSO-d<sub>6</sub>) δ 174.3, 172.3, 169.0, 155.7 and 155.8 (1C), 138.7, 129.6 (2C), 128.4 (2C), 126.5, 78.5, 56.1, 50.6, 42.2, 37.7, 28.6 (3C), 24.6, 23.2 and 23.3 (1C), 21.8 and 21.8 (2C).

**HRMS** (ESI) *m/z*: Calcd for [M+Na]<sup>+</sup> 458.2262; Found: 458.2260.

**FT-IR** (neat): 3310, 2956, 2359, 1651, 1455, 1393, 1366, 1251, 1164, 699, 578 cm<sup>-1</sup>

[α]<sub>D</sub><sup>25</sup> 9.07 (c 0.83 CHCl<sub>3</sub>)

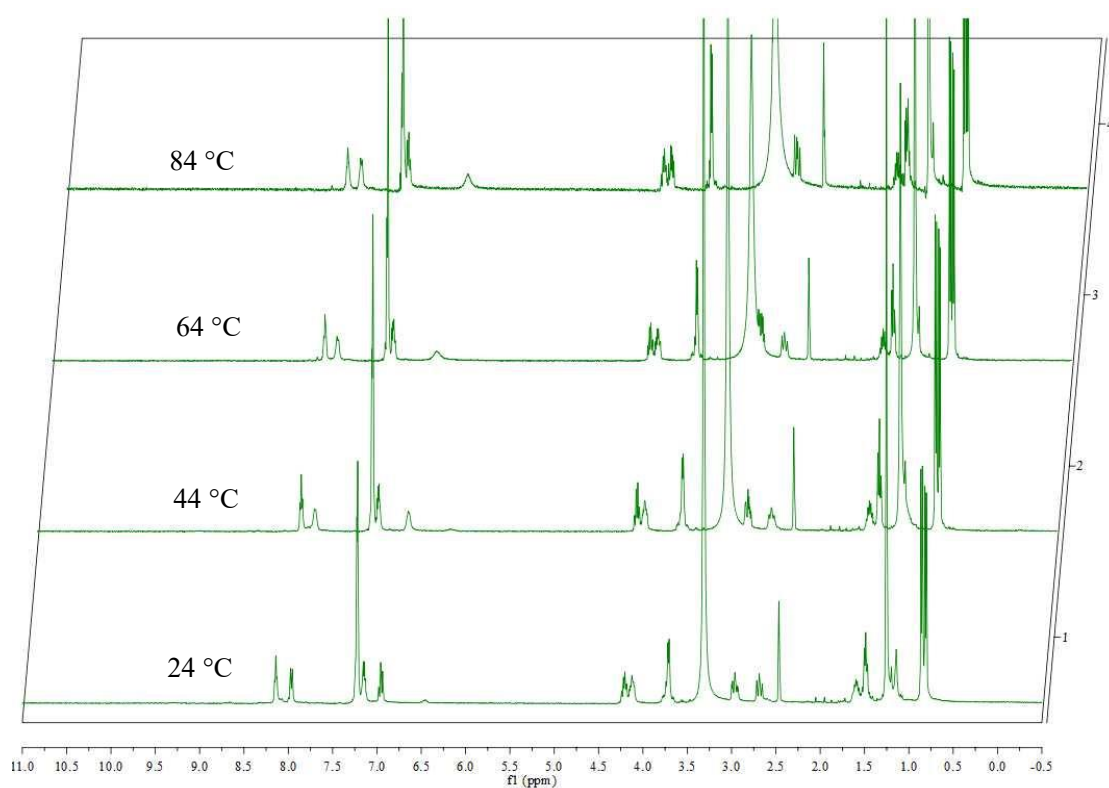

Variable temperature **<sup>1</sup>H NMR** (399 Hz, DMSO-d<sub>6</sub>) spectra of compound **3y** to prove the rotamer.

**(*tert*-Butoxycarbonyl)-*L*-phenylalanylglycyl-*L*-proline**

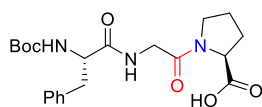

**Boc-Phe-Gly-Pro-OH (3z)**

**3z** was obtained in 66% yield as yellow solid (**mixture of two rotamers**). Purification by CH<sub>2</sub>Cl<sub>2</sub>/MeOH = 91%/9%.

**<sup>1</sup>H NMR** (44 °C (399 MHz, DMSO-d<sub>6</sub>) δ 7.89 (s, 1H), 7.35 – 7.03 (m, 5H), 6.81, 6.35 (s, 1H), 4.59 – 4.51 and 4.28 – 4.12 (m, 1H), 4.28 – 4.12 (m, 1H), 4.05 – 3.77 and 3.65 – 3.57 (m, 2H), 3.56 – 3.37 (m, 2H), 3.02 (dd, *J* = 13.5, 3.9 Hz, 1H), 2.71 (dd, *J* = 12.8, 11.2 Hz, 1H), 2.30 – 1.98 and 1.75 – 1.64 (m, 2H), 1.95 – 1.78 (m, 2H), 1.26 (s, 9H).

**<sup>13</sup>C NMR** (100 MHz, DMSO-d<sub>6</sub>) δ 173.9 and 173.6 (1C), 172.3 and 172.2 (1C), 167.4 and 167.1 (1C), 155.7, 138.8 and 138.7 (1C), 129.6 (2C), 128.4 (2C), 126.5, 78.4, 59.0 and 58.4 (1C), 56.1, 46.7 and 45.9 (1C), 41.6 and 41.5 (1C), 37.9, 31.2 and 29.1 (1C), 28.5 and 28.2 (3C), 24.7 and 22.3 (1C).

**HRMS** (ESI) *m/z*: Calcd for [M+Na]<sup>+</sup> 442.1949; Found: 442.1950

**FT-IR** (neat): 2918, 2370, 1637, 1456, 1366, 1168, 1022, 753, 700 cm<sup>-1</sup>

[α]<sub>D</sub><sup>24</sup> -33.54 (c 0.6 CHCl<sub>3</sub>)

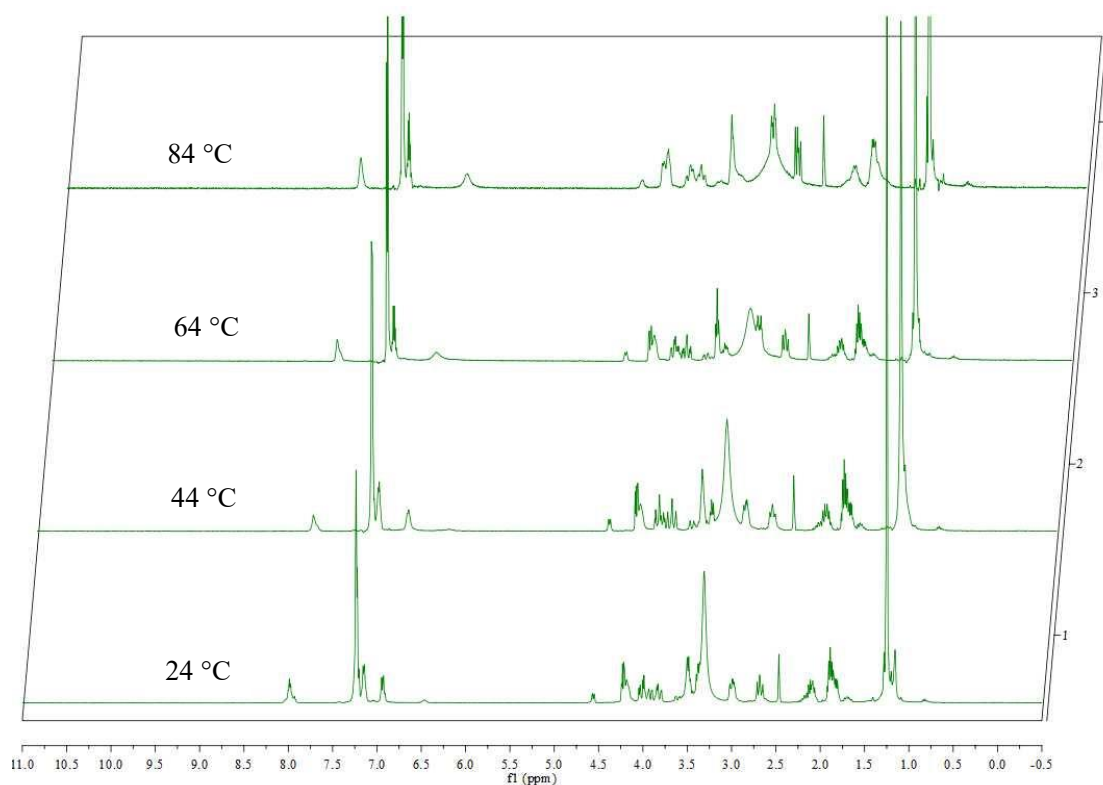

Variable temperature **<sup>1</sup>H NMR** (399 Hz, DMSO-d<sub>6</sub>) spectra of compound **3z** to prove the rotamer.

### ((Benzyloxy)carbonyl)-L-leucylglycyl-L-phenylalanine

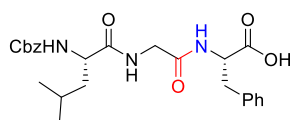

Cbz-Leu-Gly-Leu-OH (3aa)

**3aa** was obtained in 55% yield as yellow solid. Purification by CH<sub>2</sub>Cl<sub>2</sub>/MeOH = 91%/9%.

**<sup>1</sup>H NMR** (399 MHz, DMSO-d<sub>6</sub>) δ 8.09 (t, *J* = 5.6 Hz, 1H), 8.02 (d, *J* = 7.9 Hz, 1H), 7.44 (d, *J* = 8.0 Hz, 1H), 7.37 – 6.98 (m, 10H), 4.97 (s, 2H), 4.45 – 4.33 (m, 1H), 4.06 – 3.93 (m, 1H), 3.65 (dd, *J* = 16.8, 4.4 Hz, 2H), 3.01 (dd, *J* = 13.8, 5.1 Hz, 1H), 2.84 (dd, *J* = 13.7, 8.8 Hz, 1H), 1.65 – 1.50 (m, 1H), 1.48 – 1.32 (m, 2H), 0.83 (d, *J* = 7.0 Hz, 3H), 0.81 (d, *J* = 6.9 Hz, 3H).

**<sup>13</sup>C NMR** (100 MHz, DMSO-d<sub>6</sub>) δ 173.1, 173.0, 169.0, 156.5, 137.8, 137.4, 129.5 (2C), 128.7 (2C), 128.6 (2C), 128.2 (2C), 128.1, 126.9, 65.8, 53.9, 53.6, 42.1, 41.0, 37.3, 24.6, 23.4, 21.8 (2C).

**HRMS** (ESI) *m/z*: Calcd for [M+Na]<sup>+</sup> 492.2105; Found: 492.2102.

**FT-IR** (neat): 3324, 2957, 2492, 1655, 1533, 1455, 1256, 1026, 951, 700 cm<sup>-1</sup>

[α]<sub>D</sub><sup>26</sup> 5.73 (c 0.47 DMSO)

### 3. Reference

1. (a) C. B. Mishra, R. K. Mongre, S. Kumari, D. K. Jeong and M. Tiwari, *RSC Adv.*, 2016, **6**, 24491; (b) S. M. Schmitt, K. Stefan and M. Wiese, *J. Med. Chem.*, 2016, **59**, 3018.
2. S. Kokinaki, L. Leondiadis and N. Ferderigos, *Org. Lett.*, 2005, **7**, 1723.

## 4. Spectra

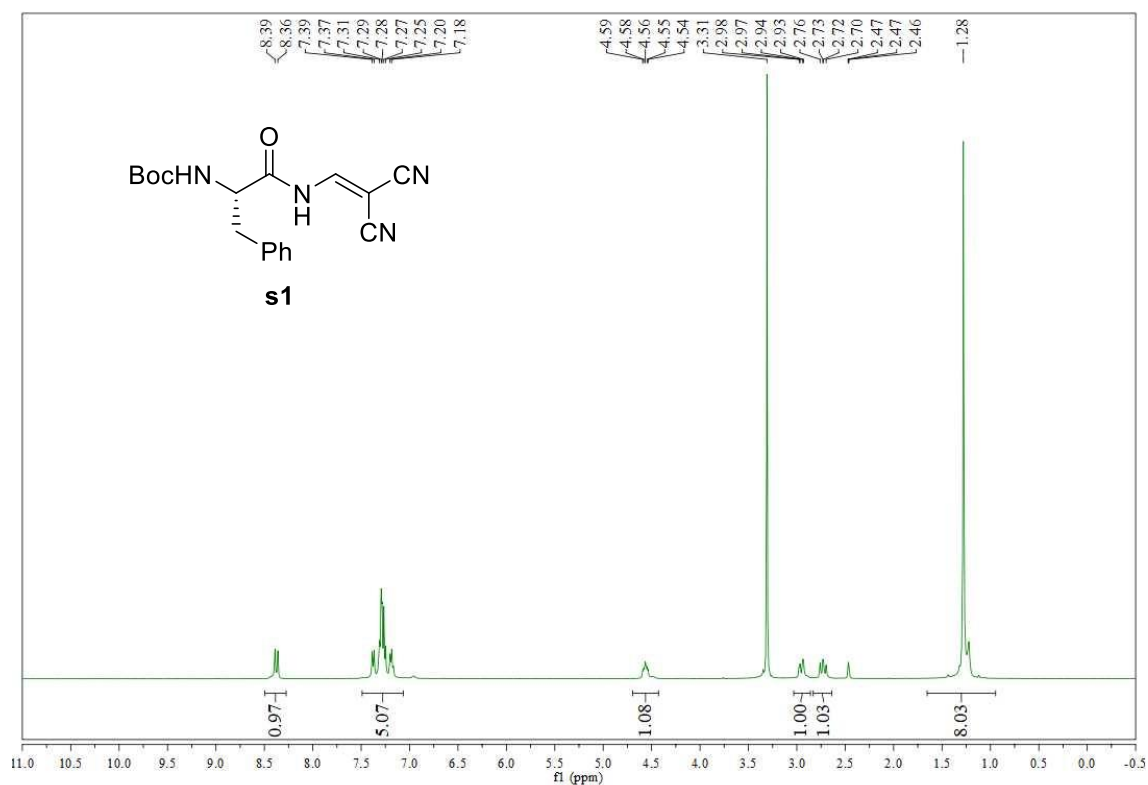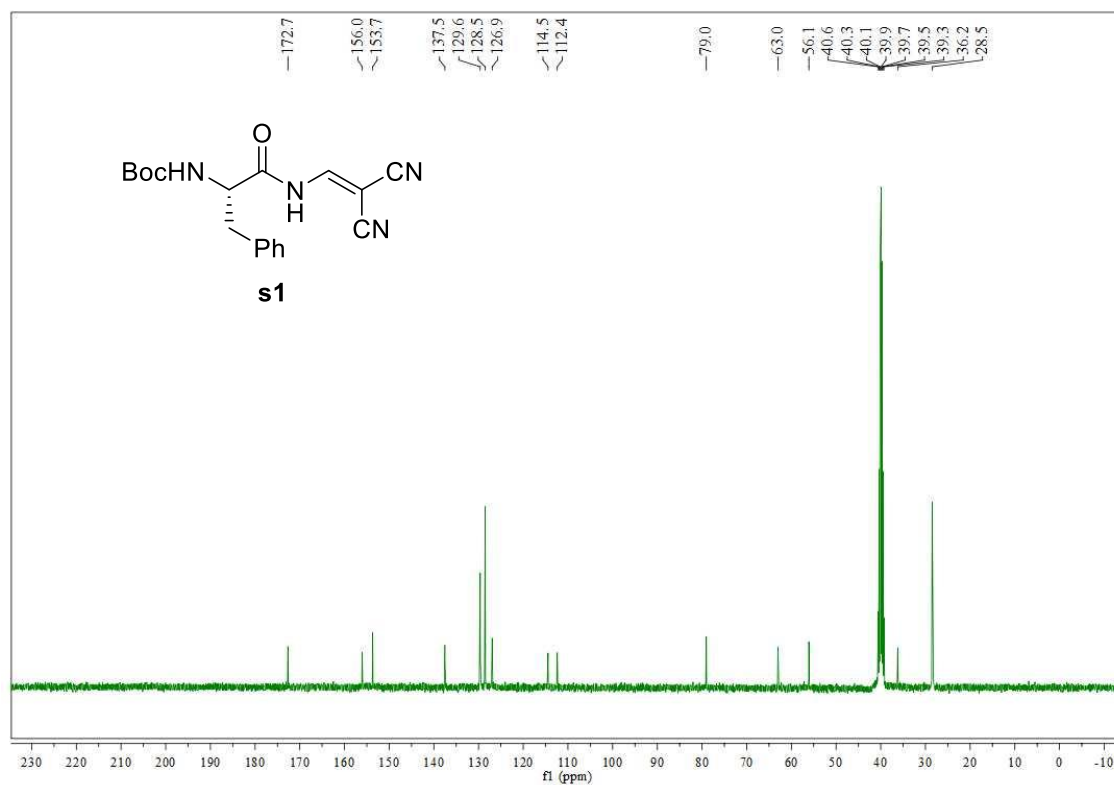

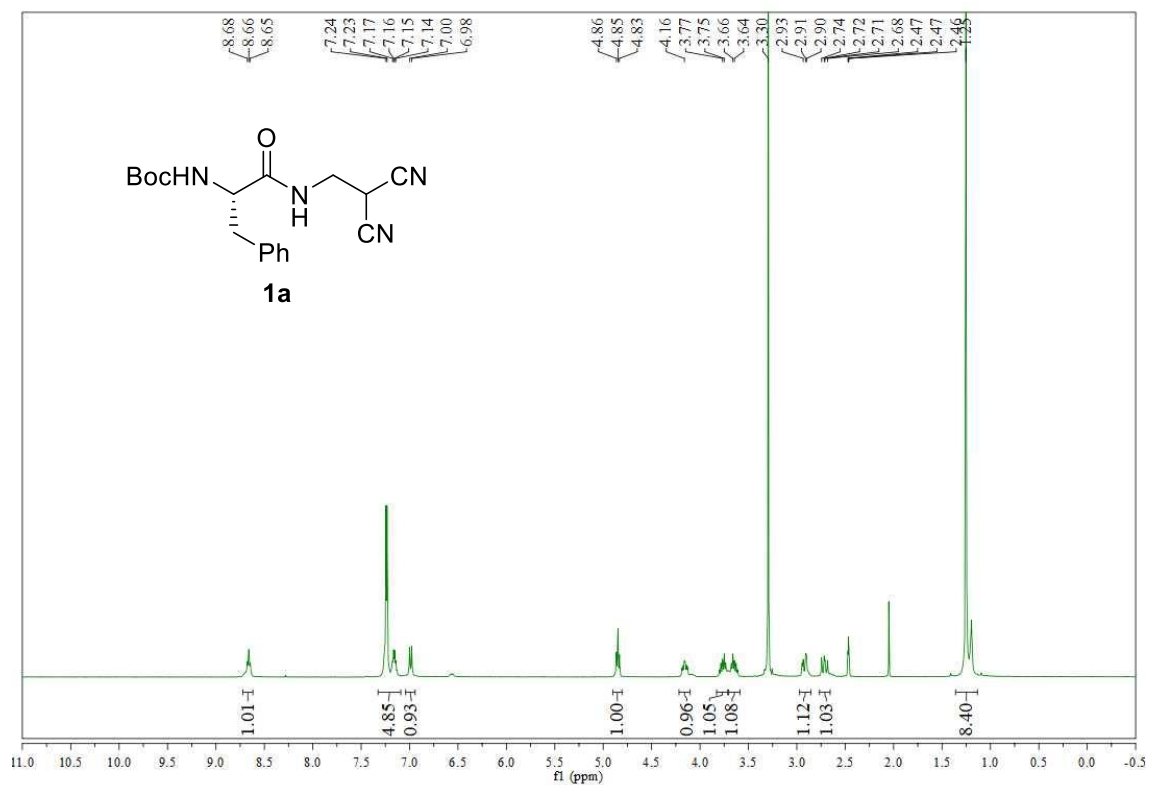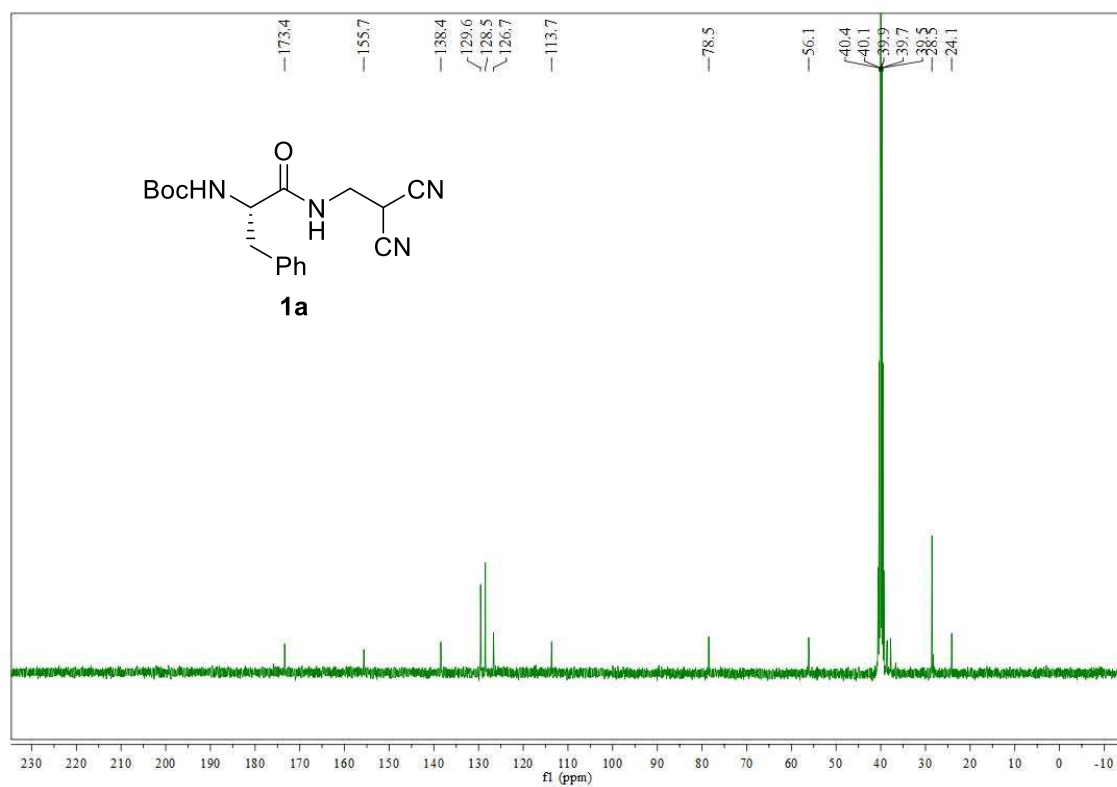

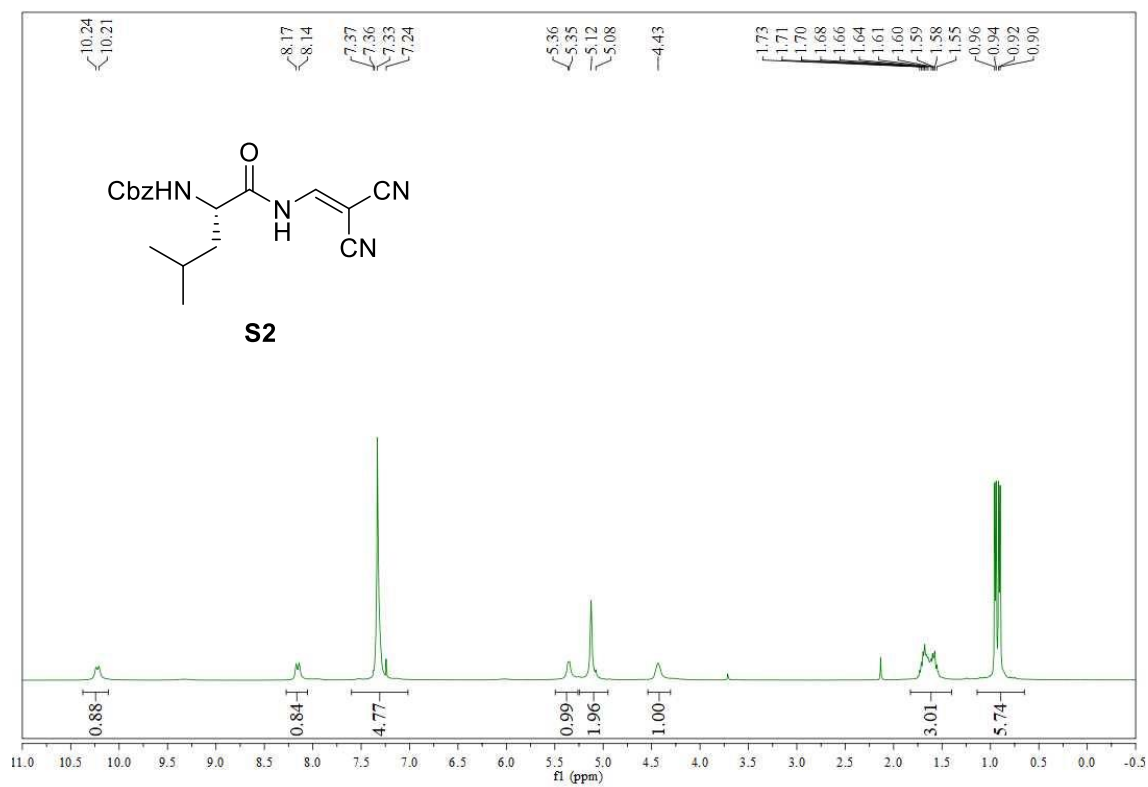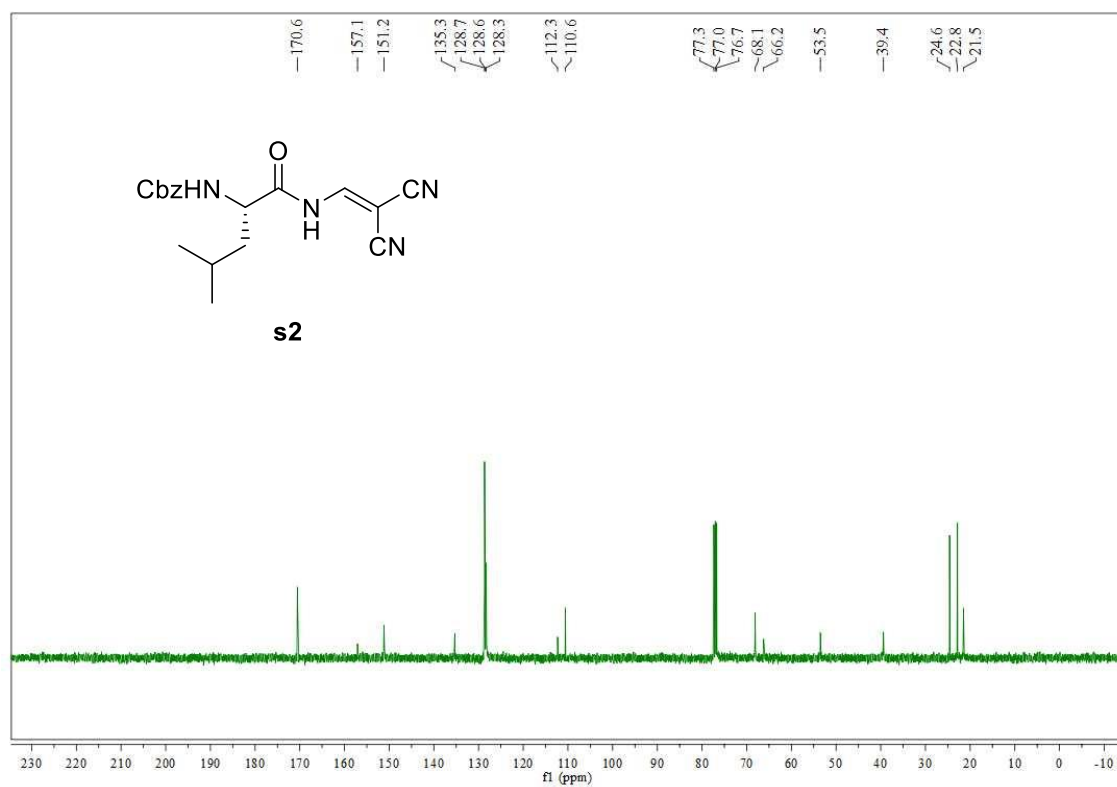

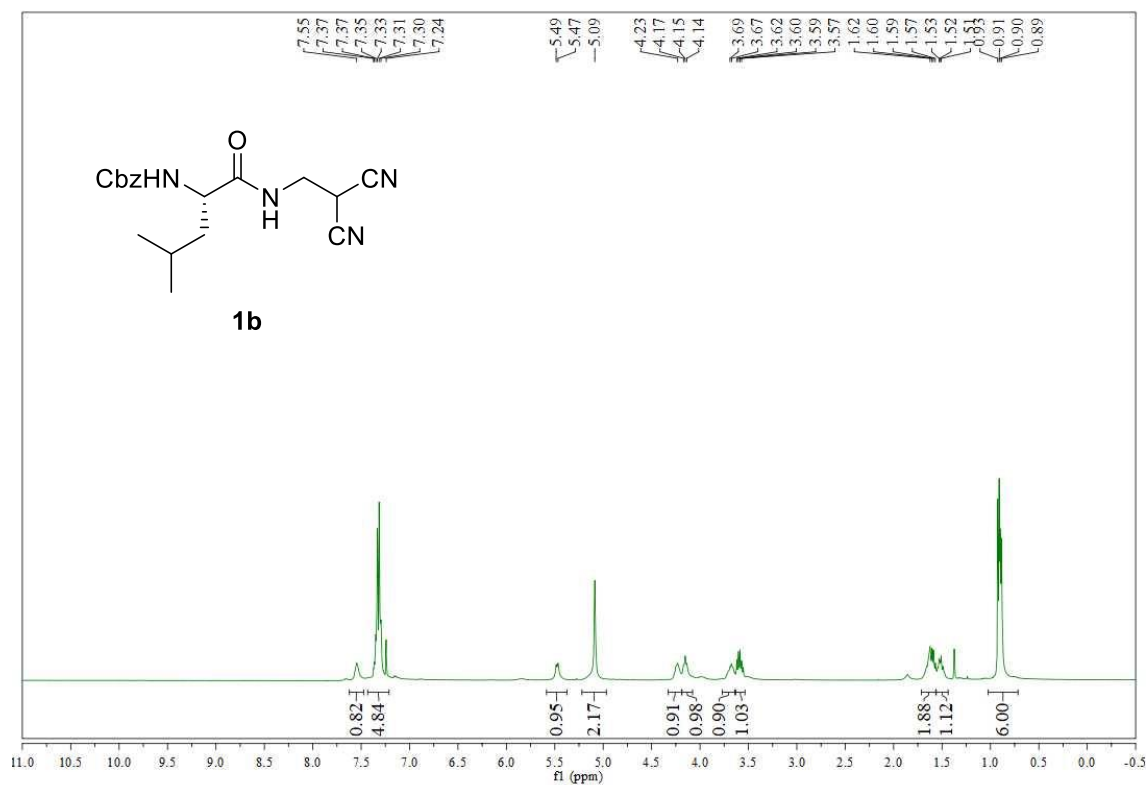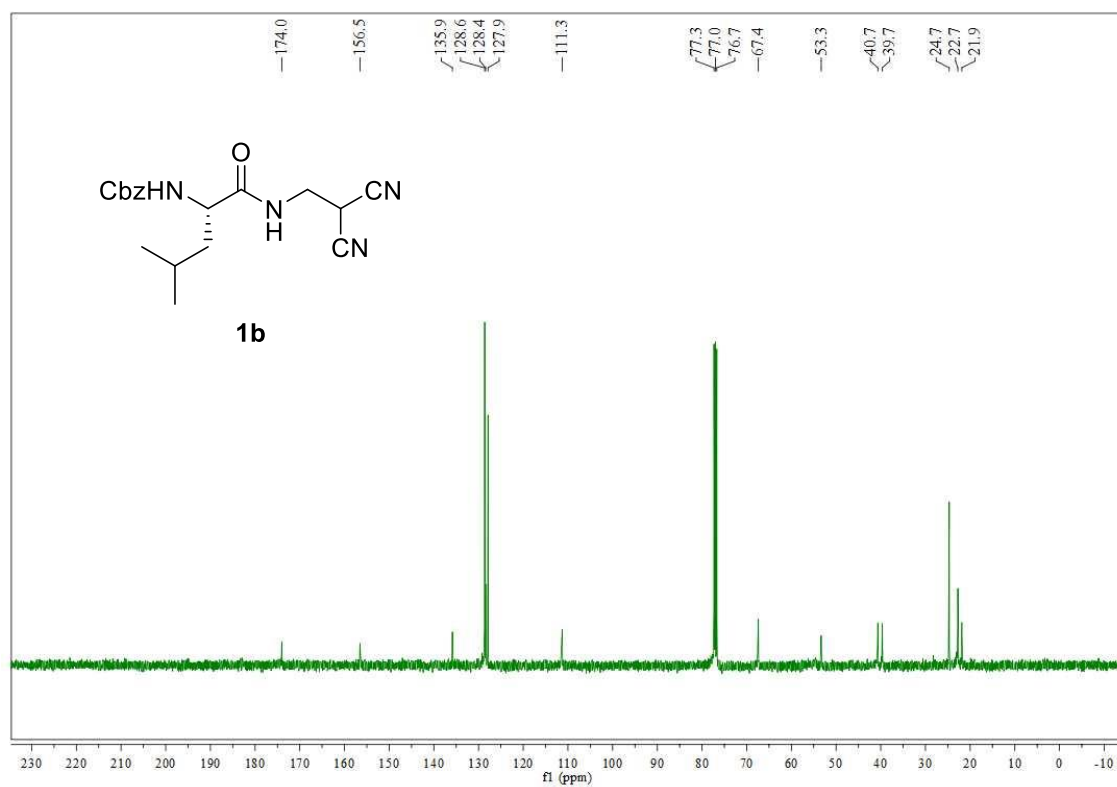

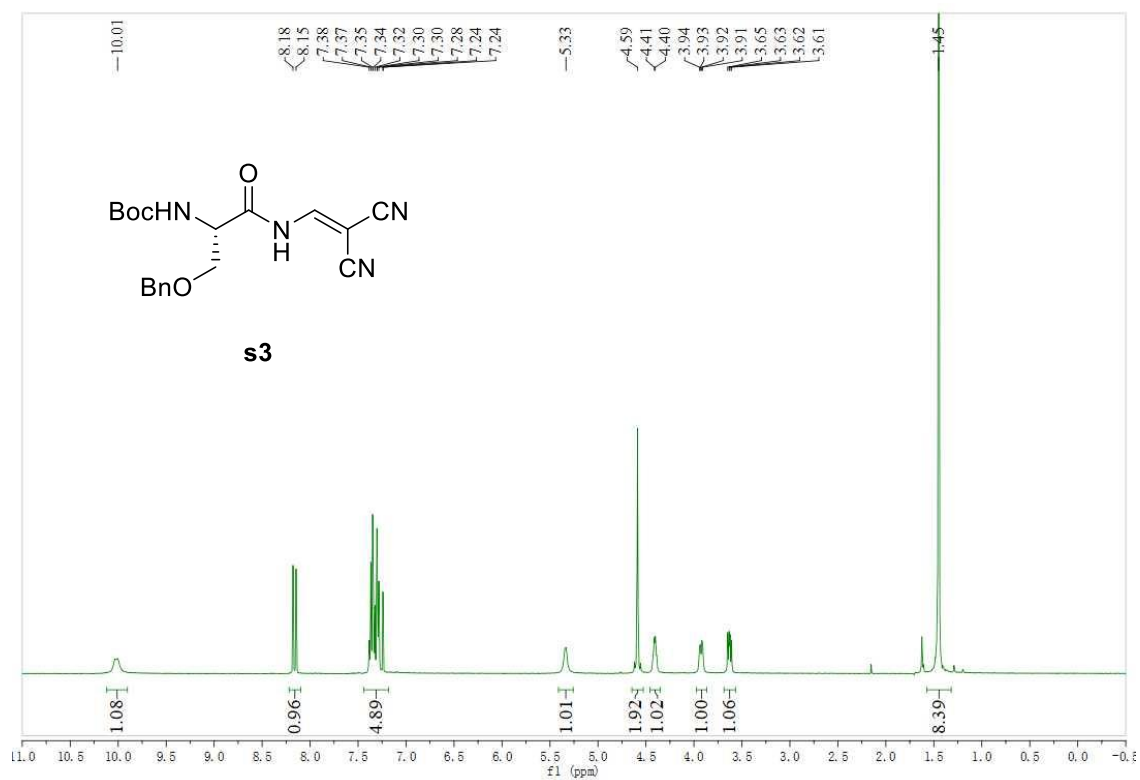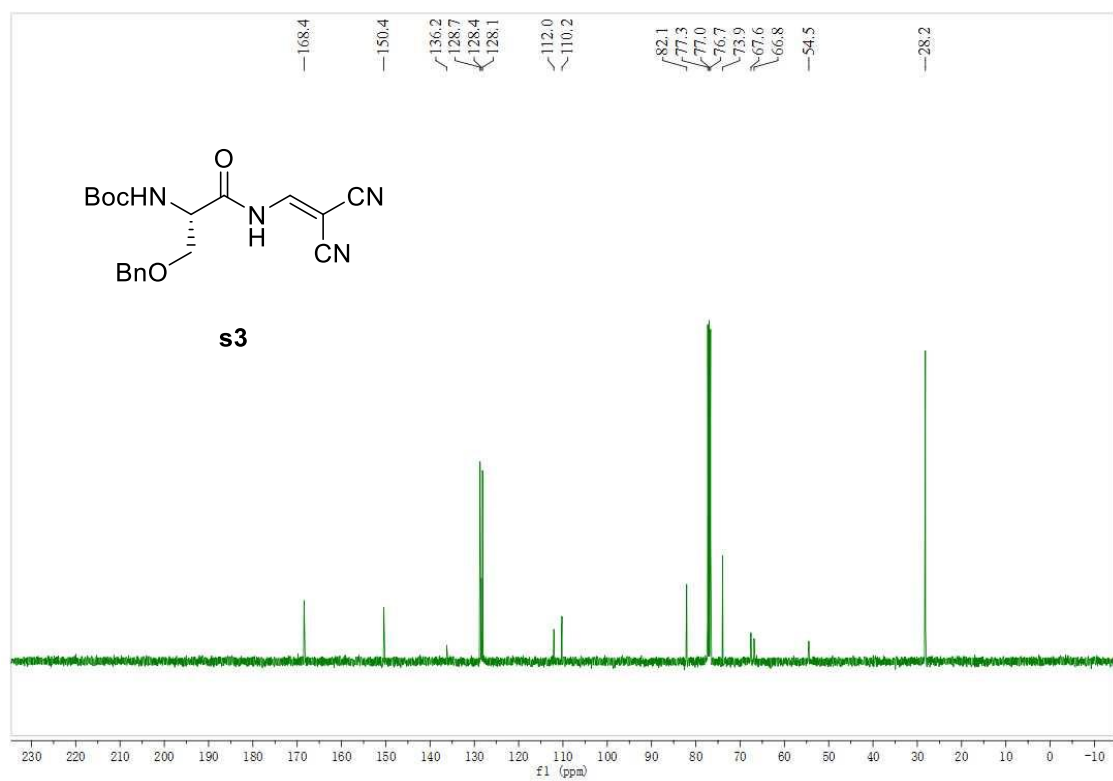

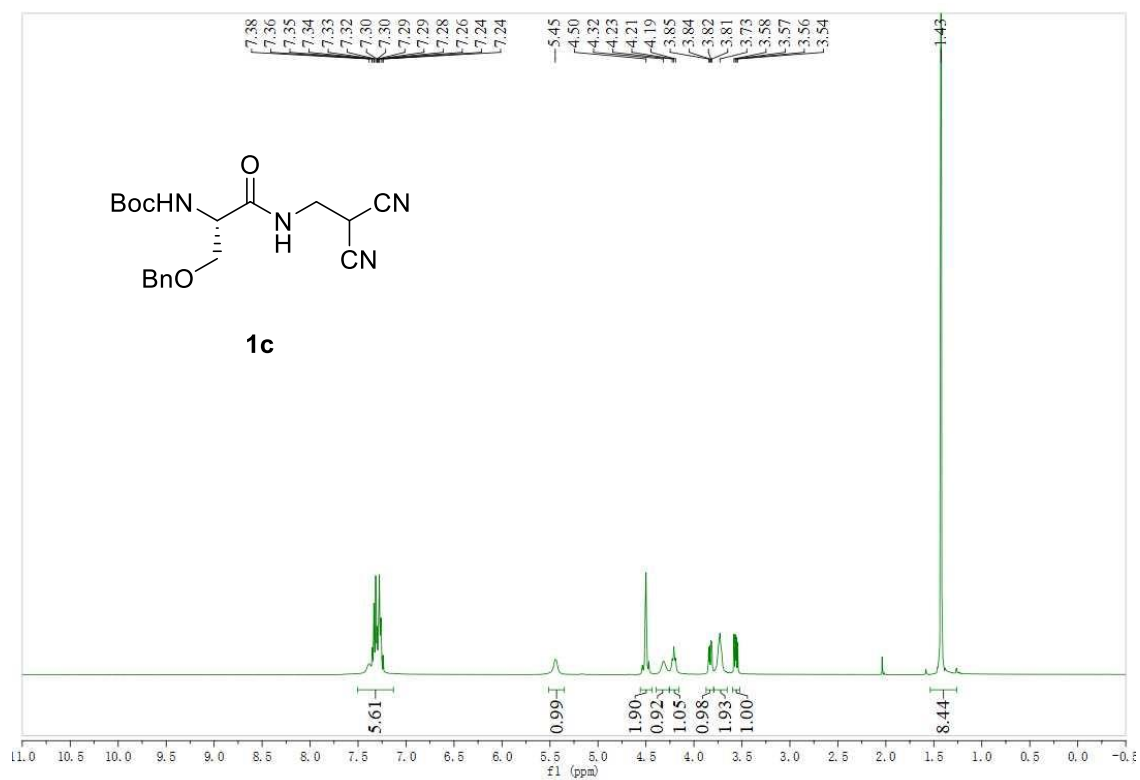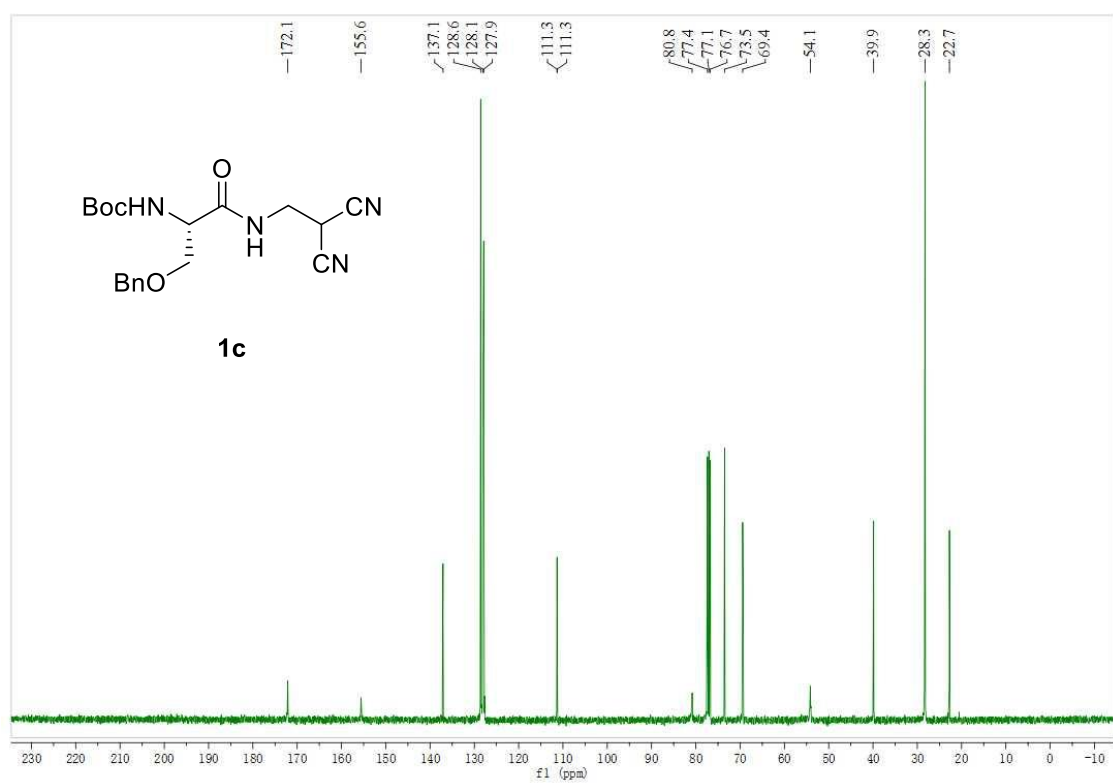

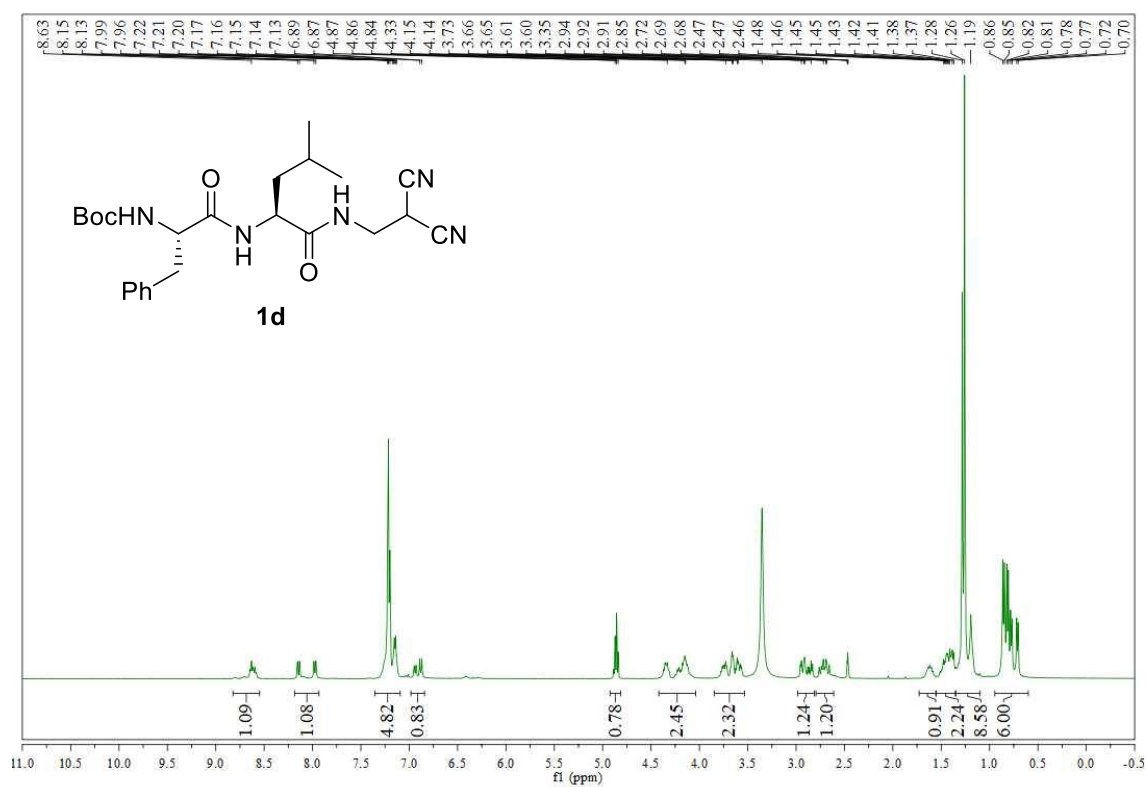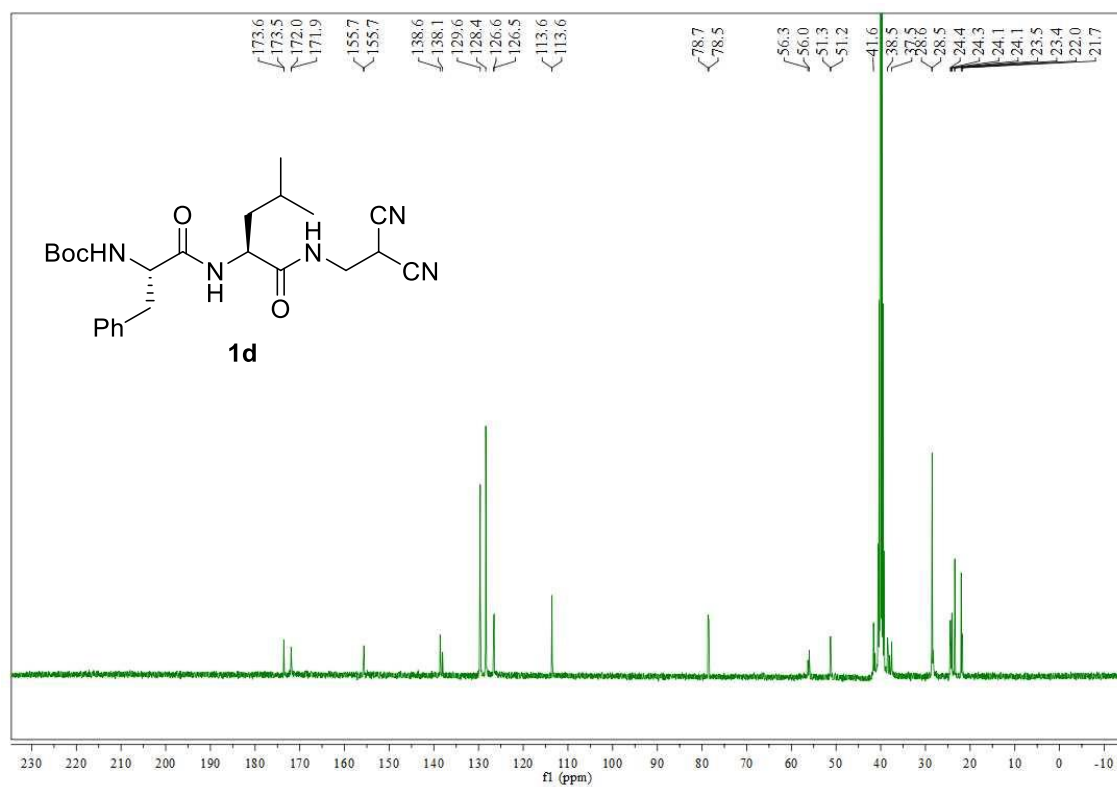

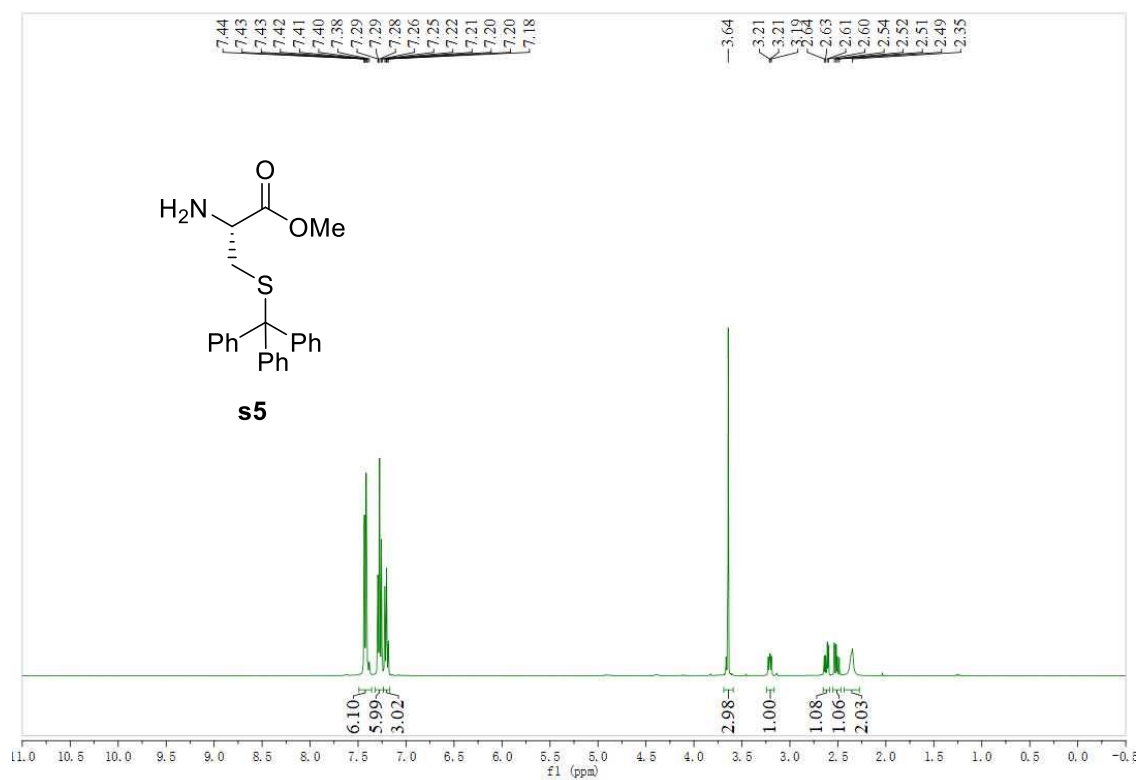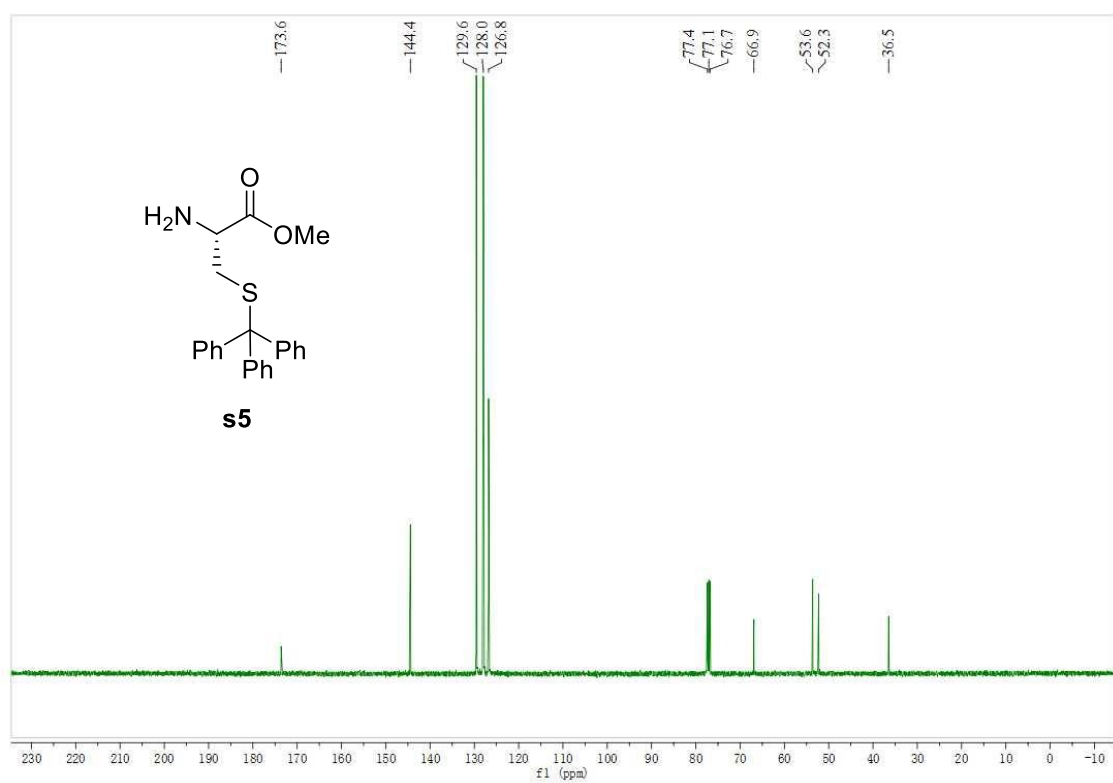

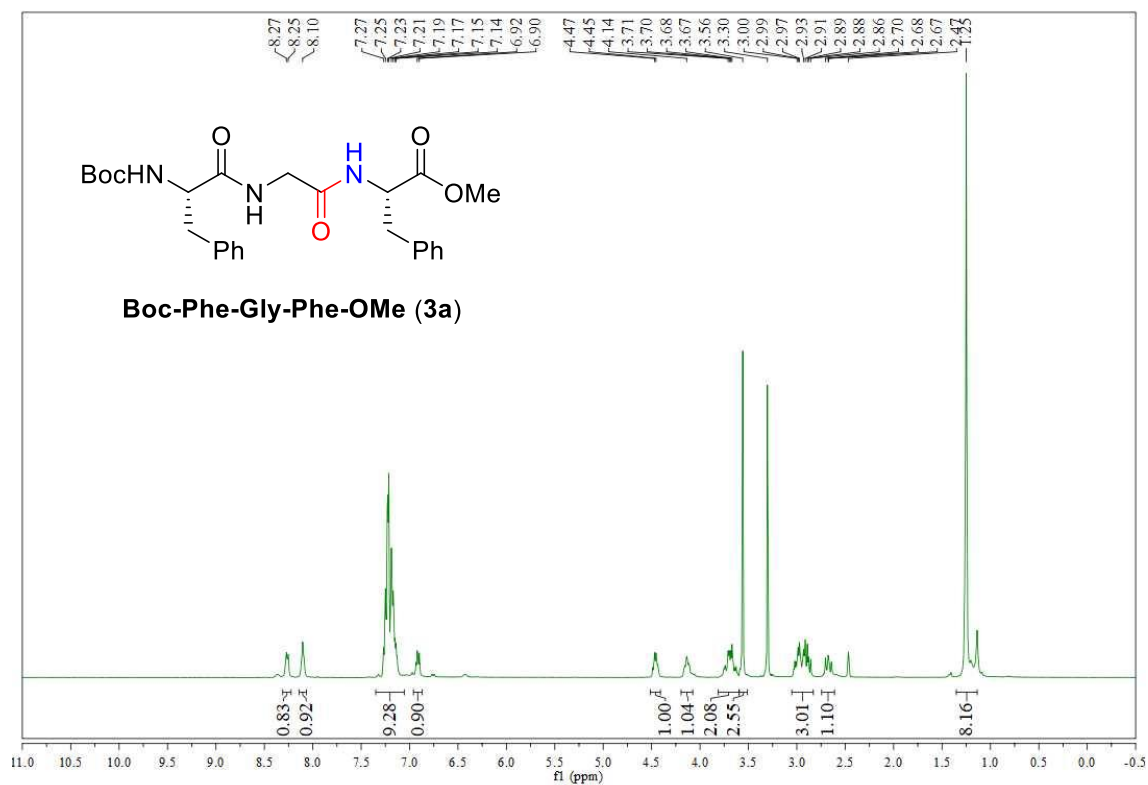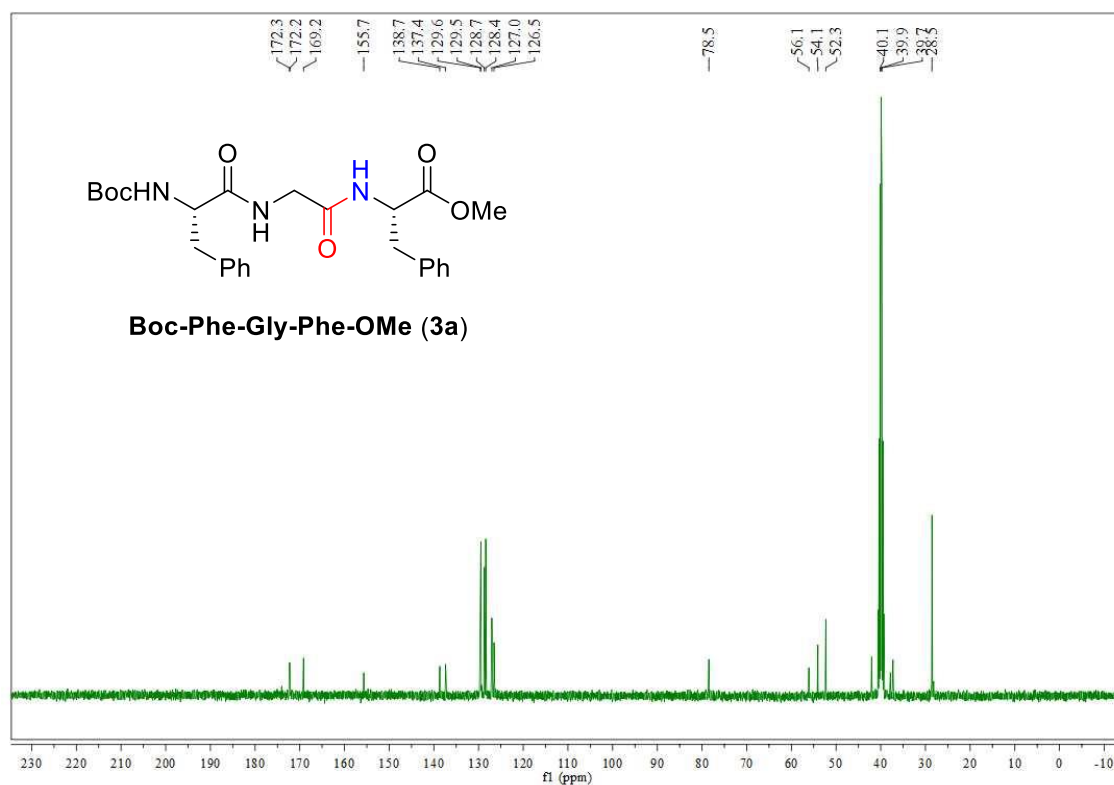

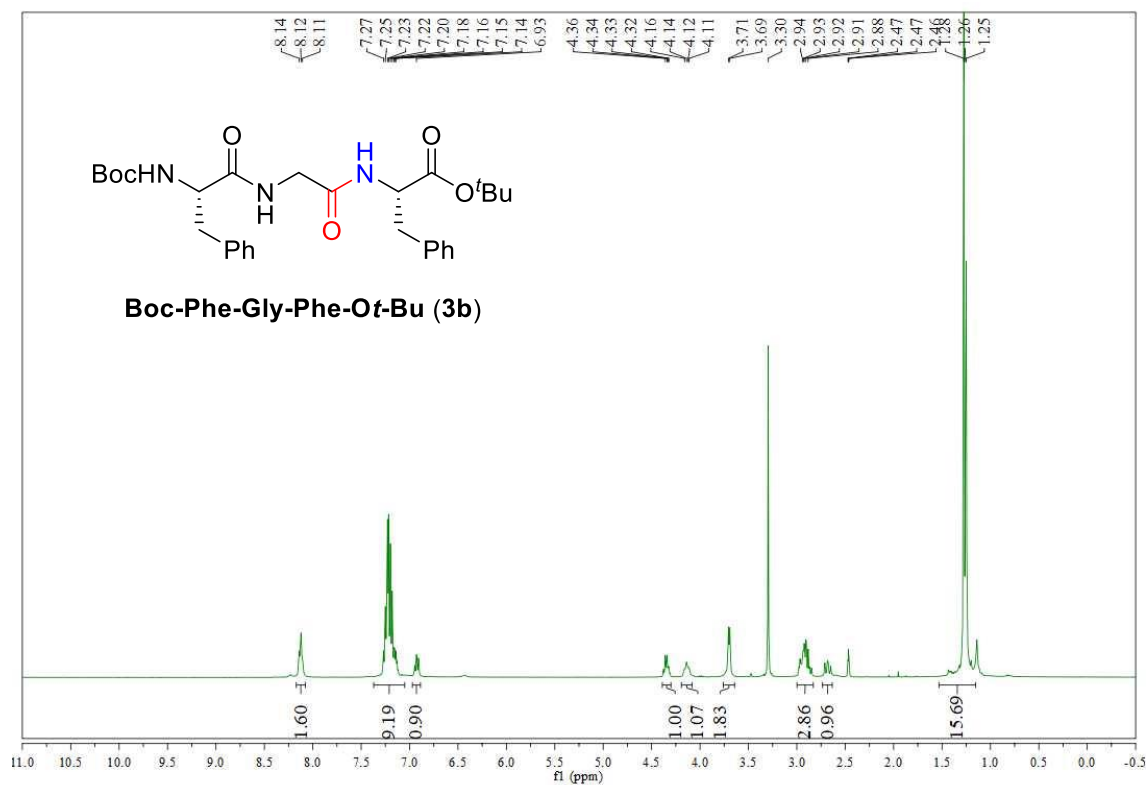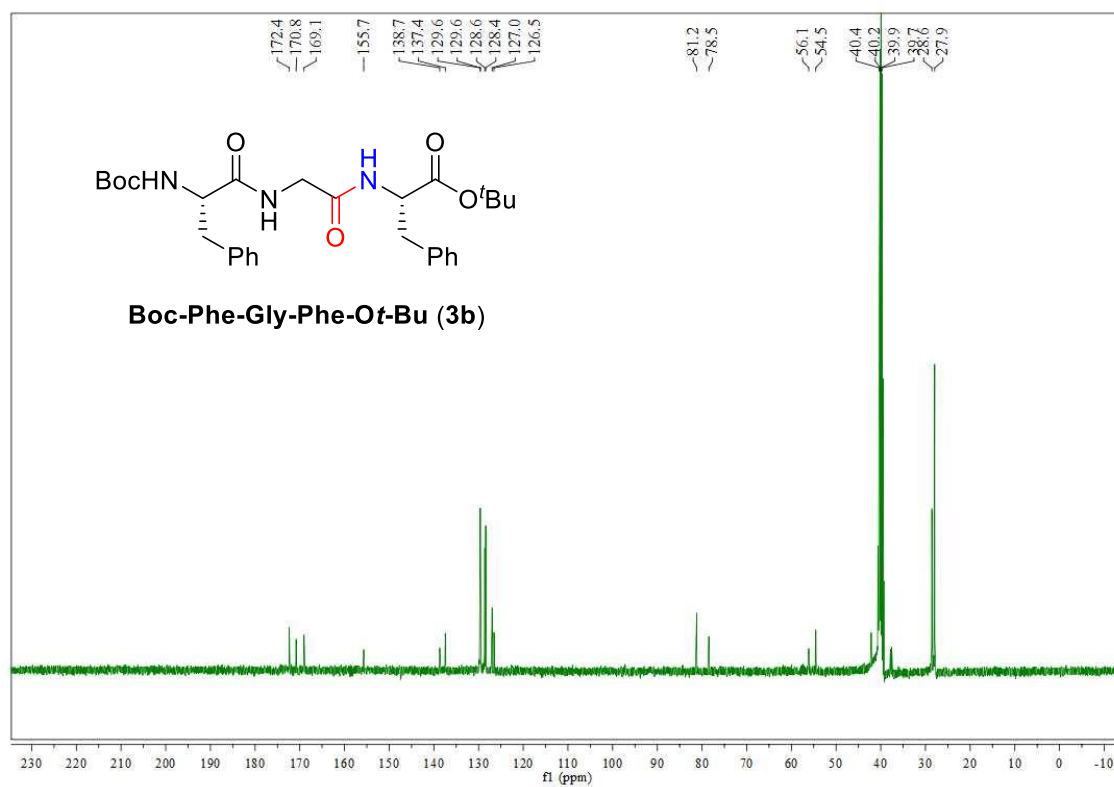

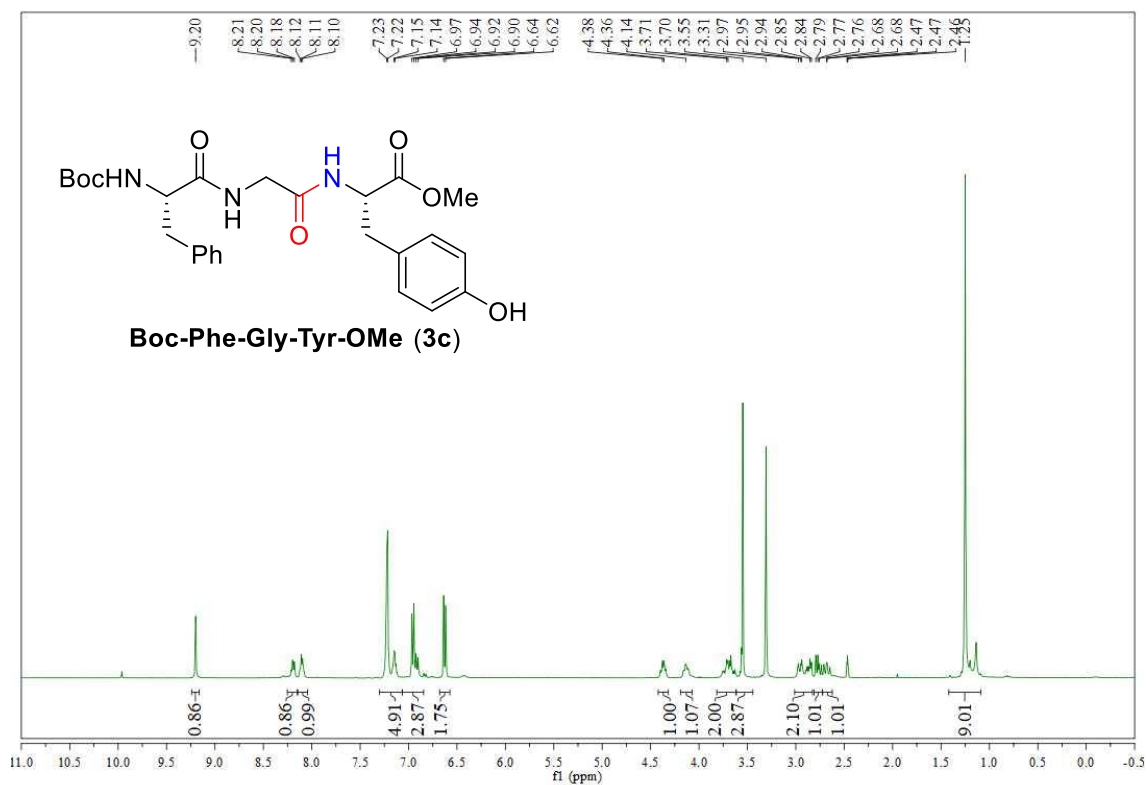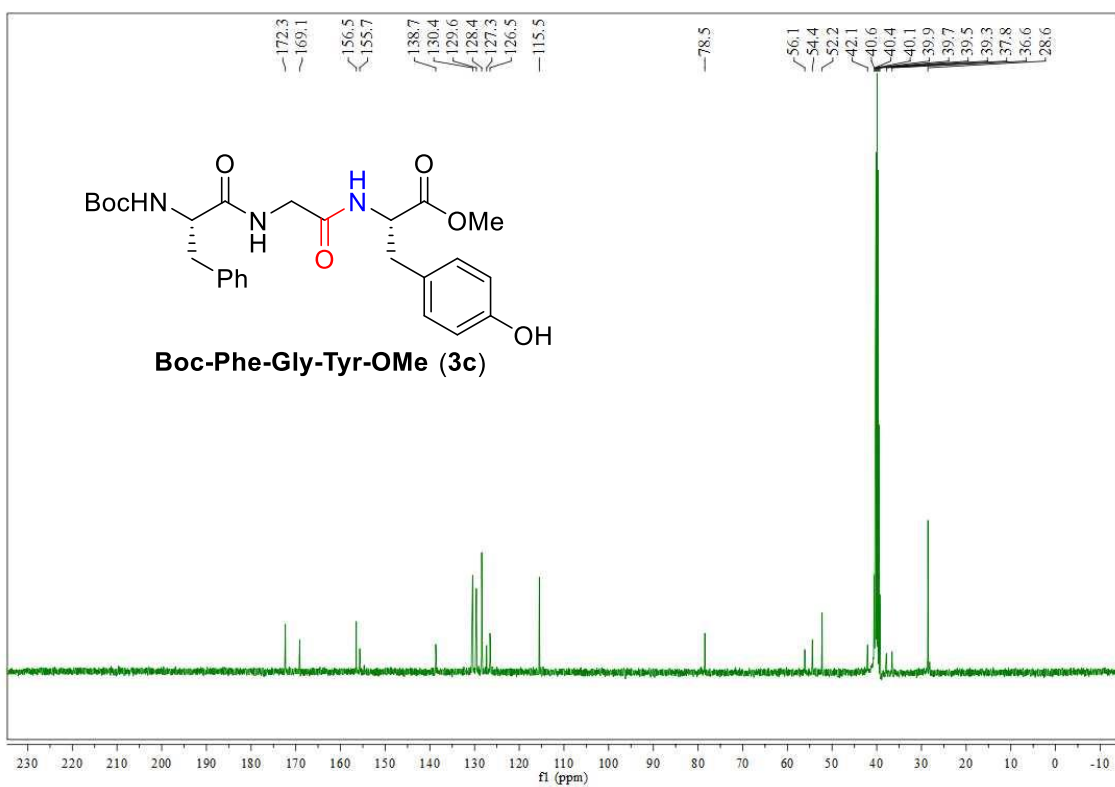

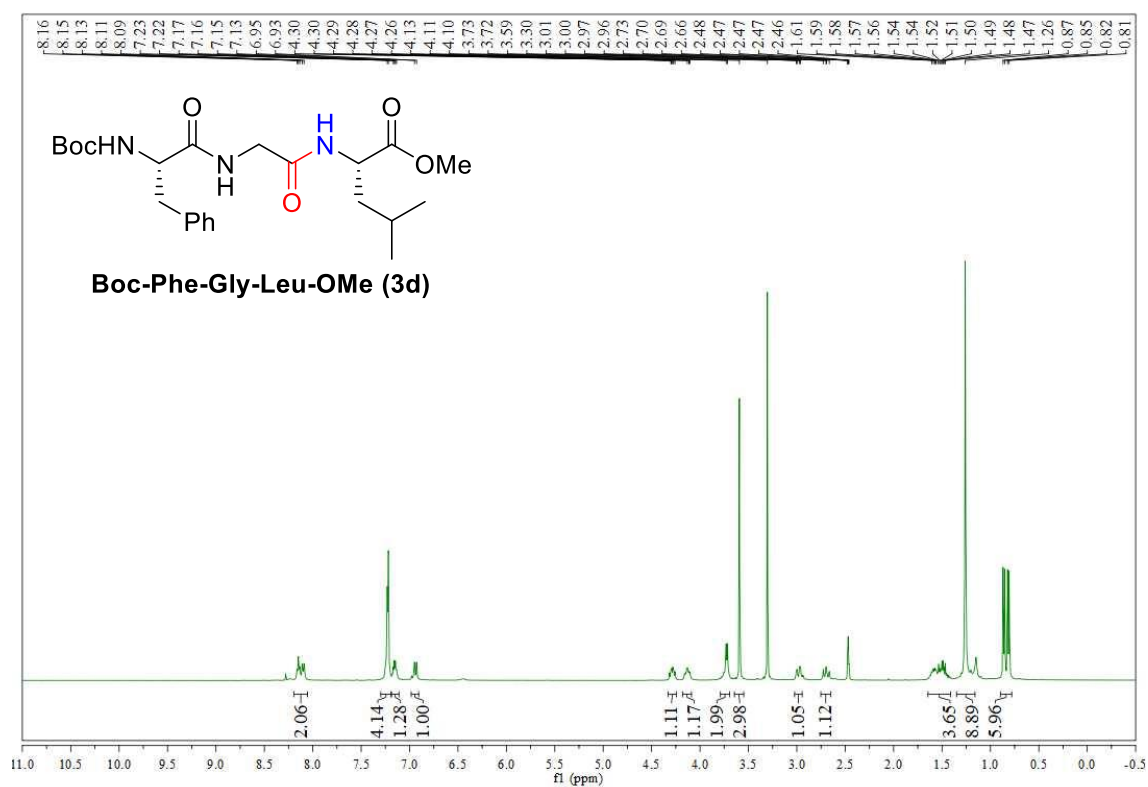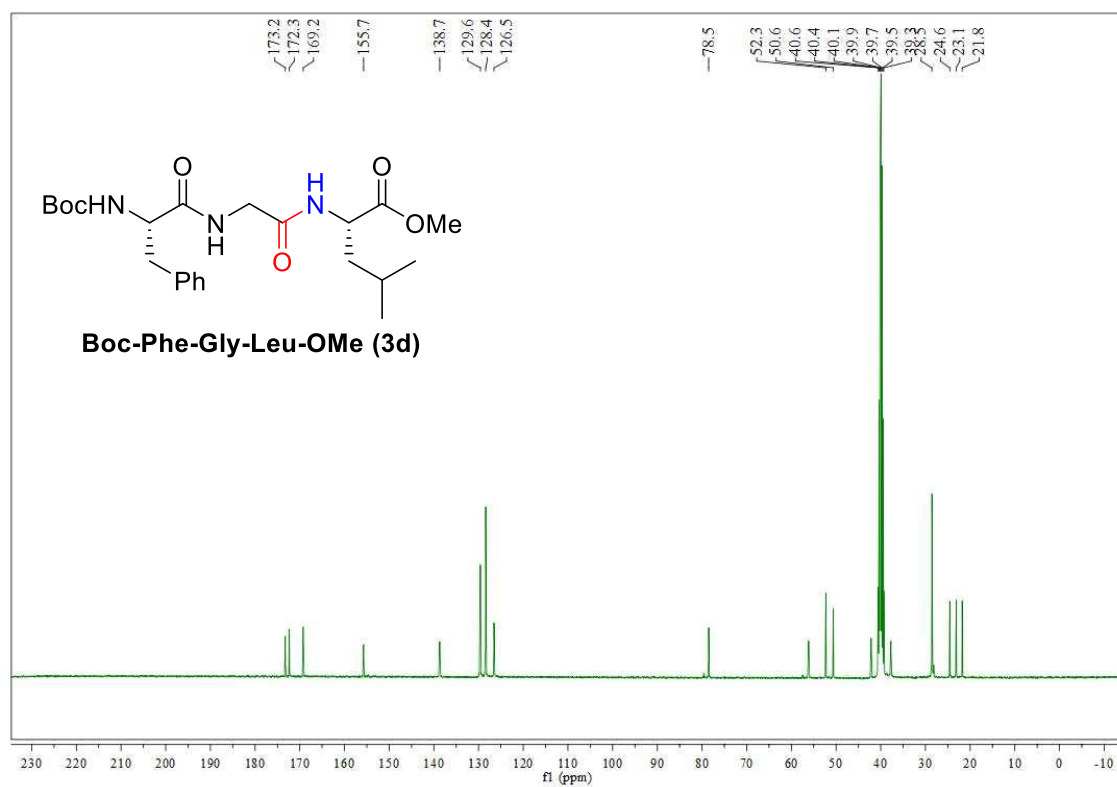

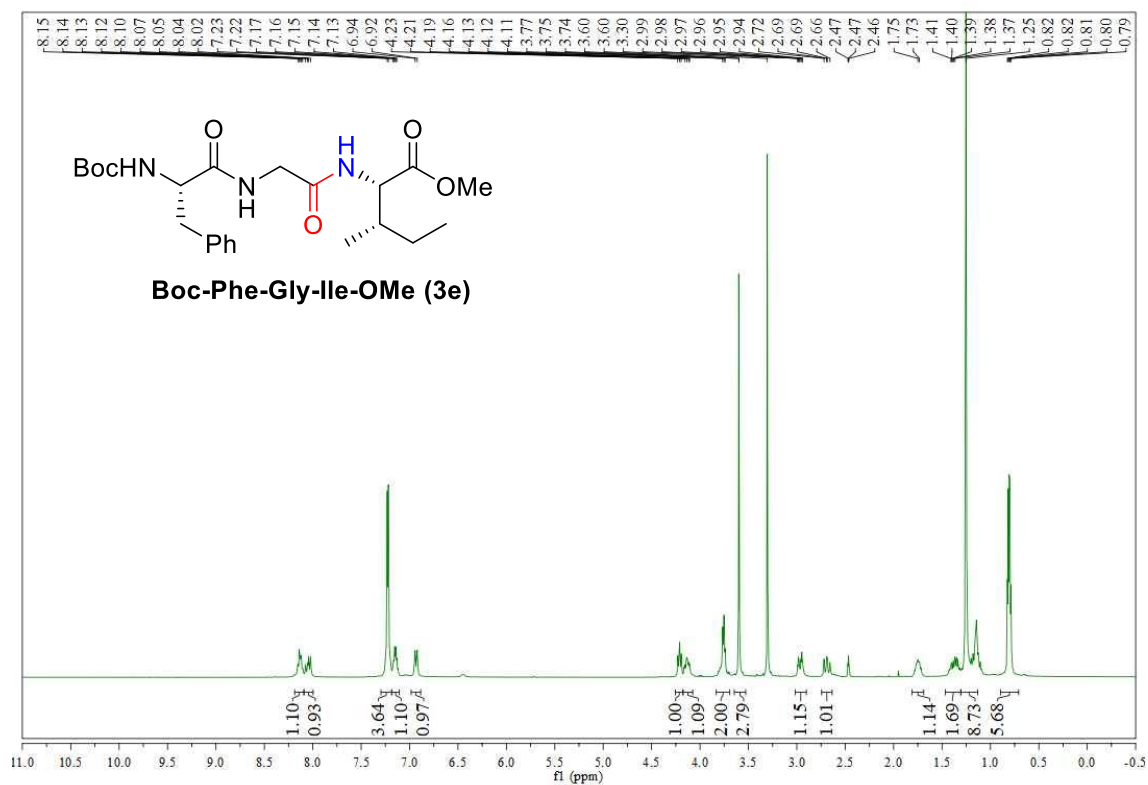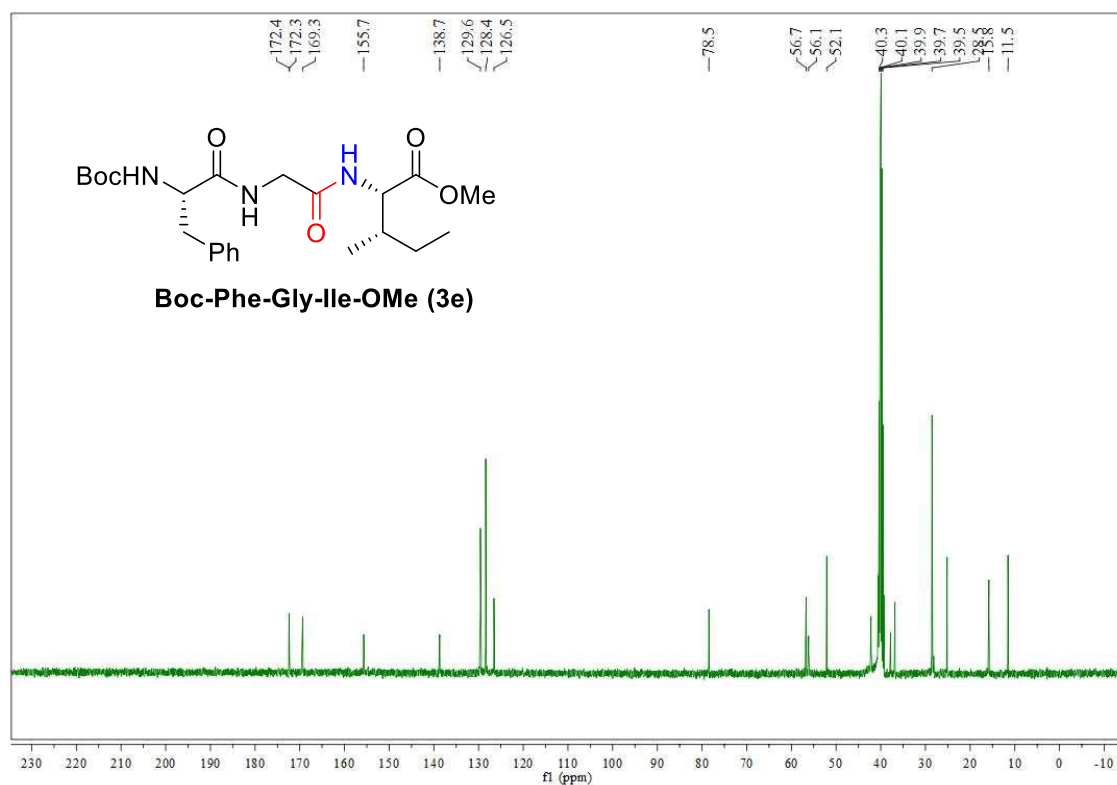

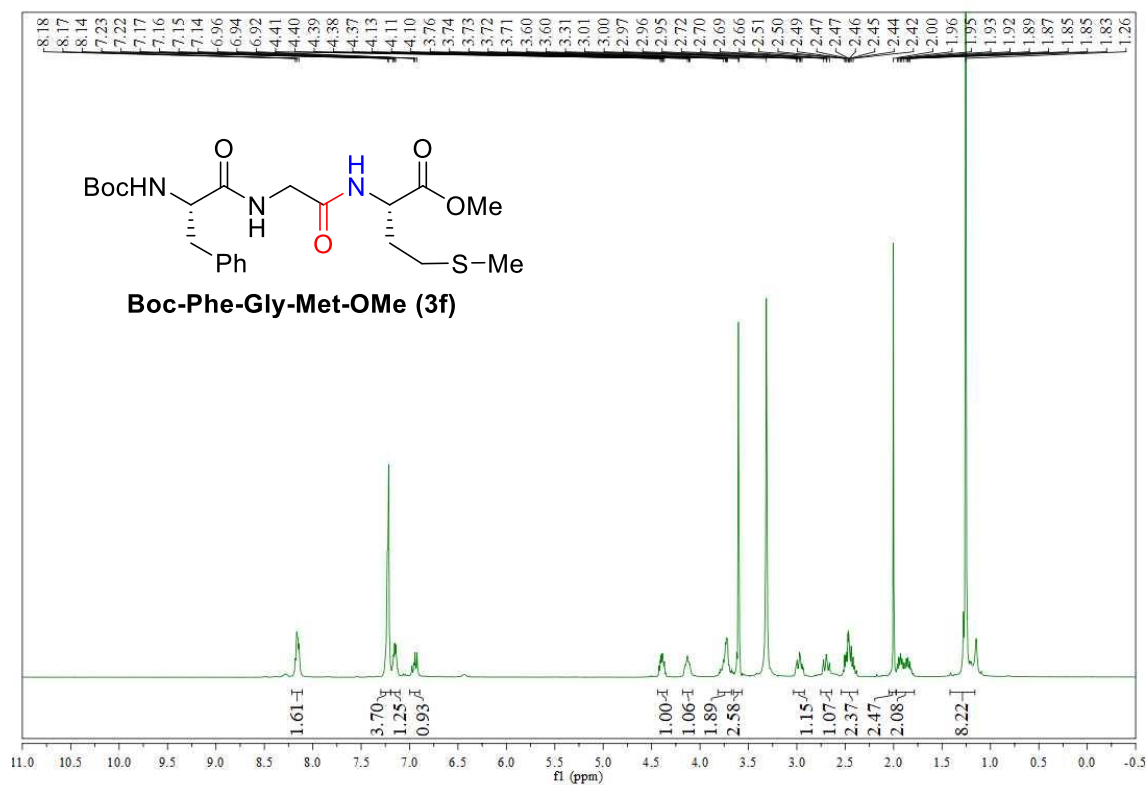

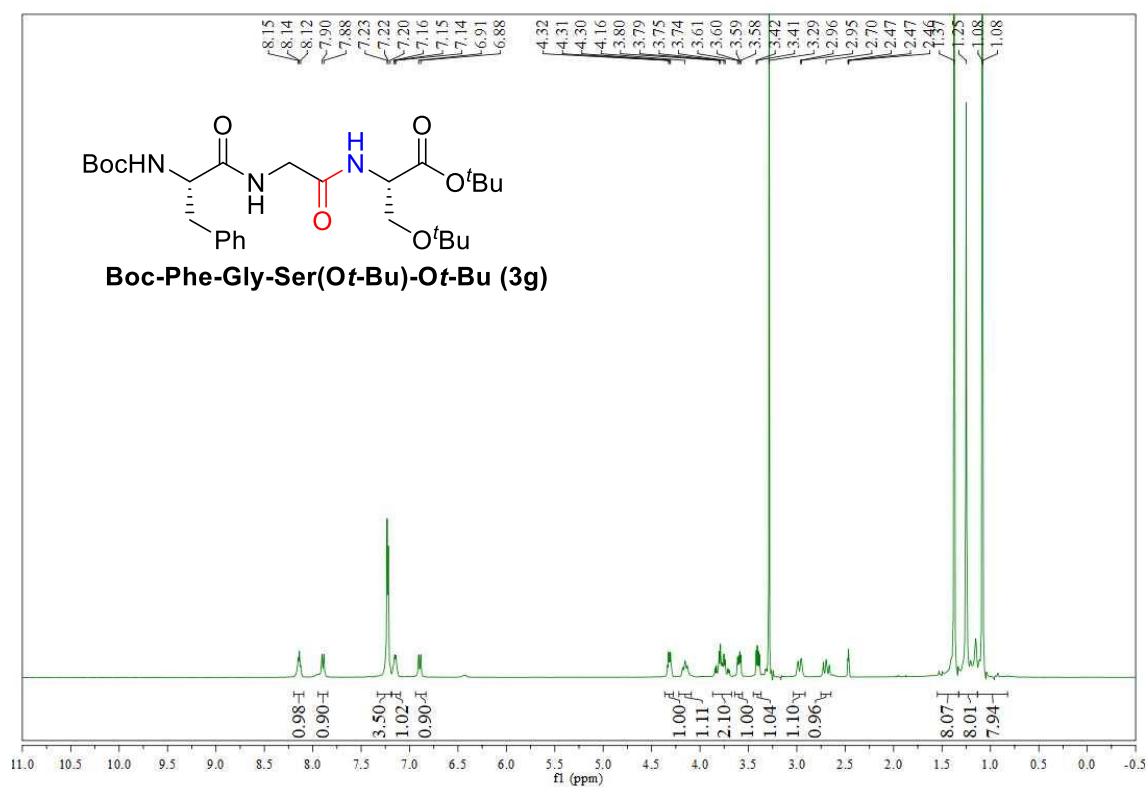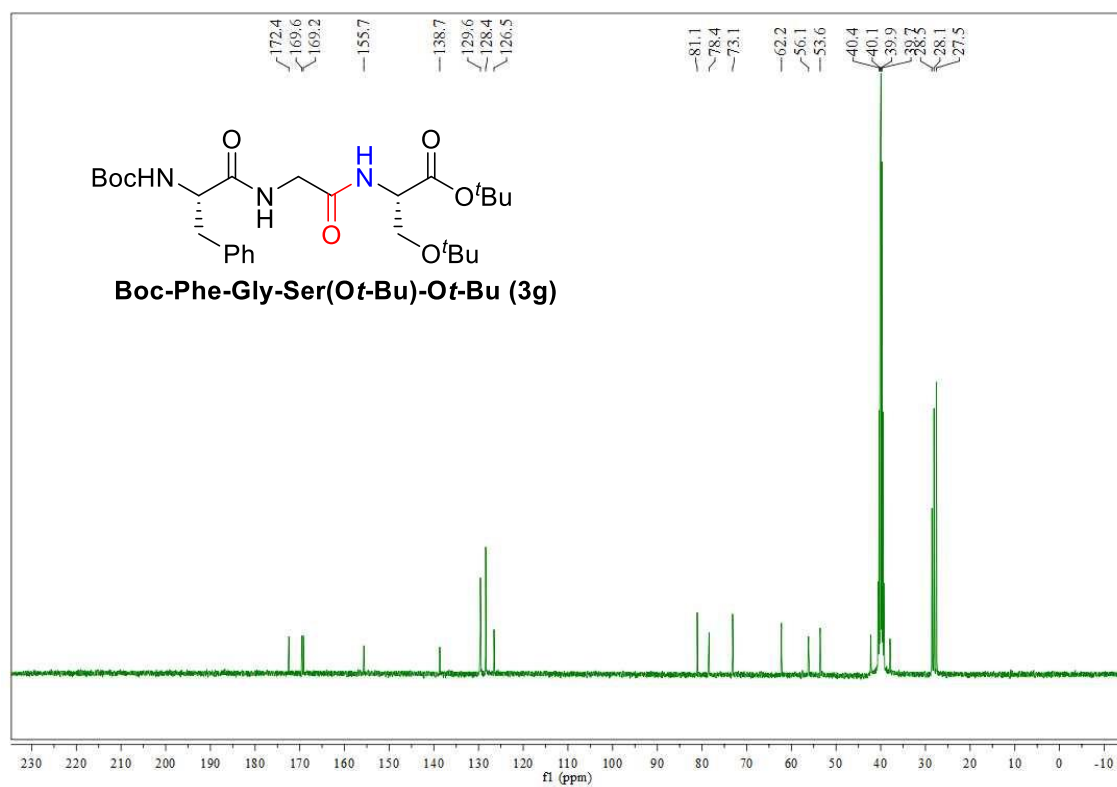

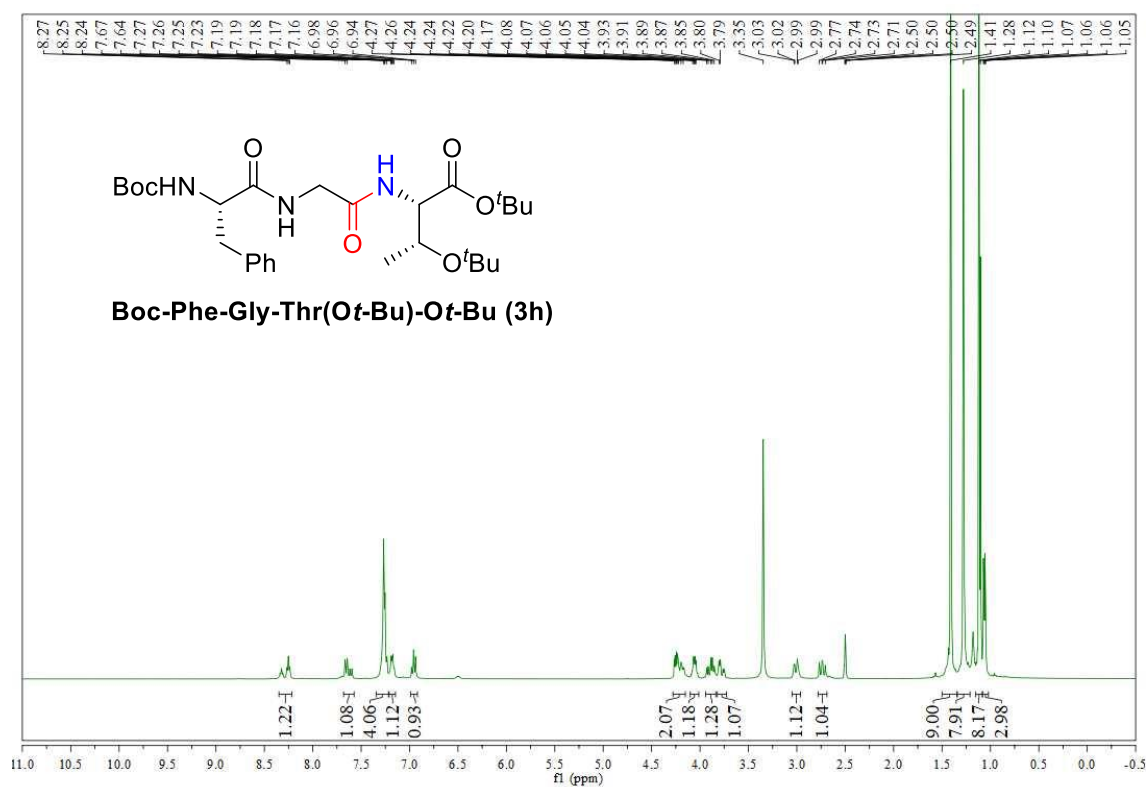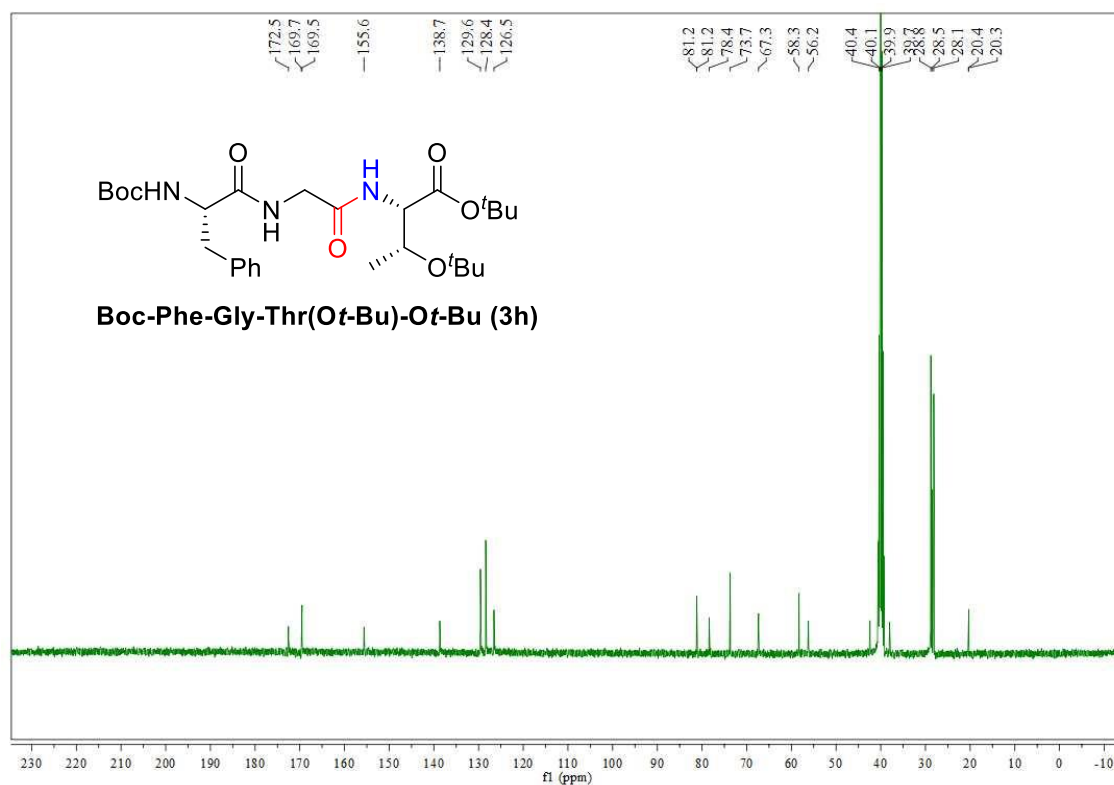

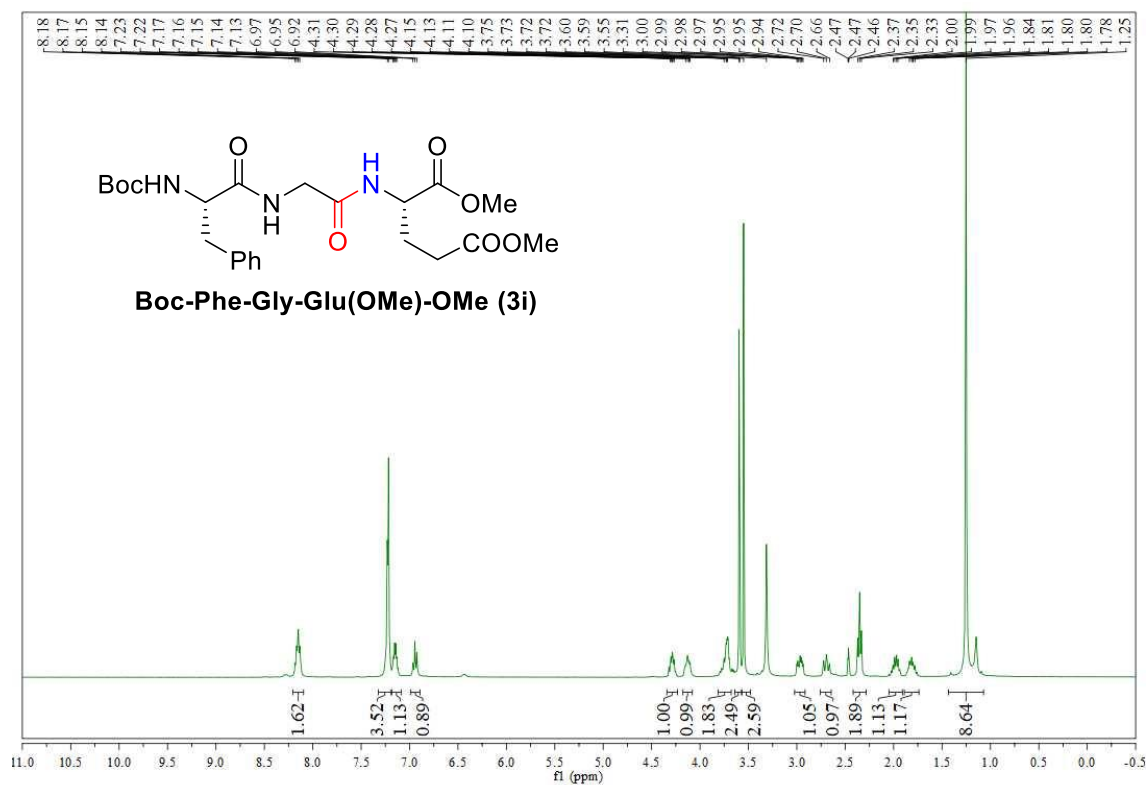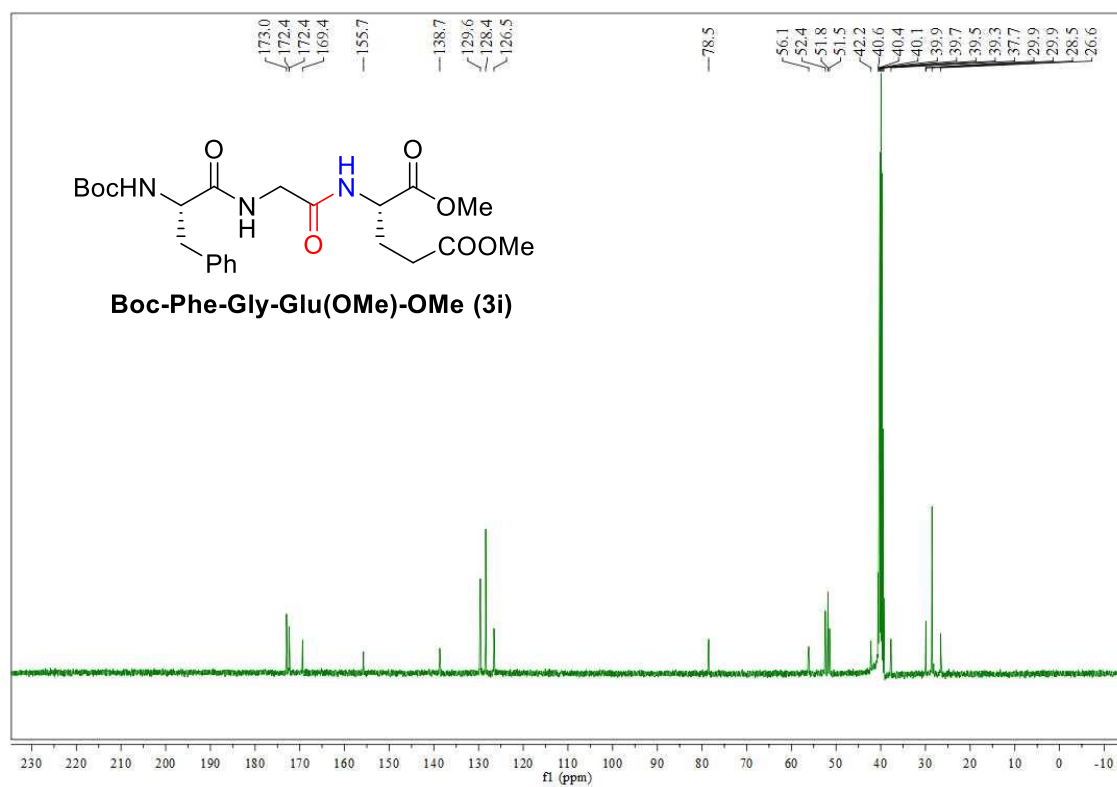

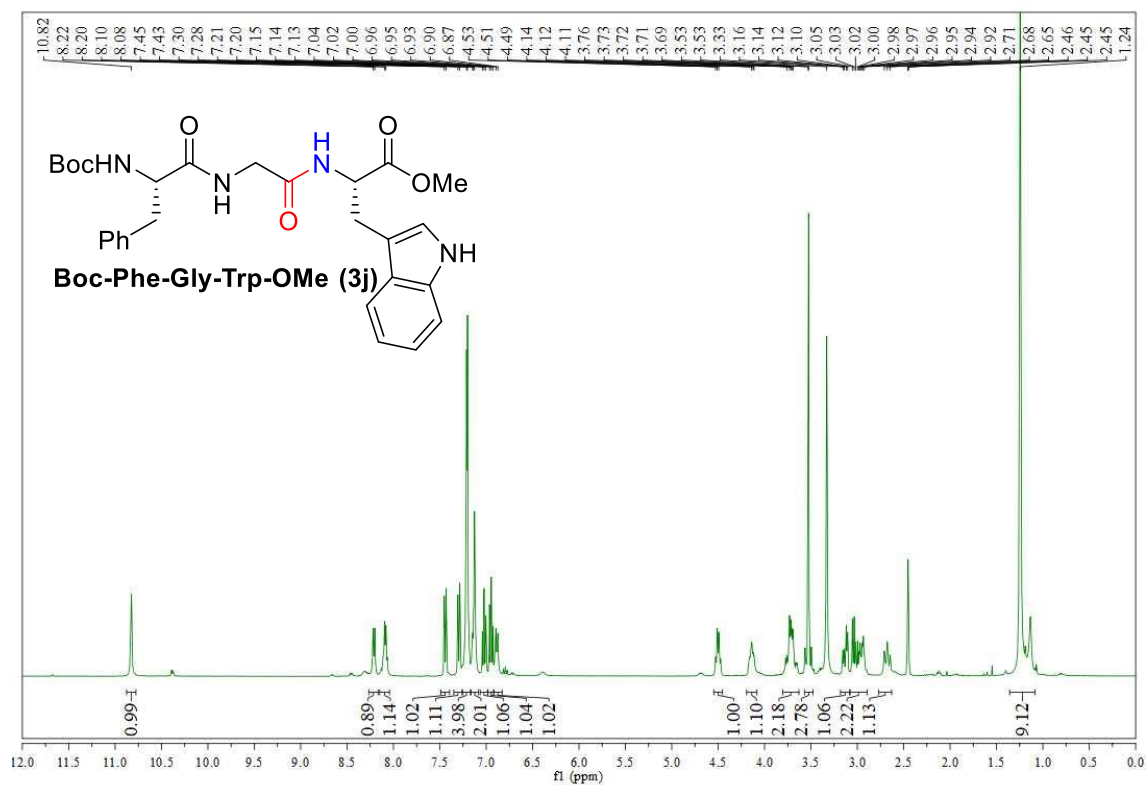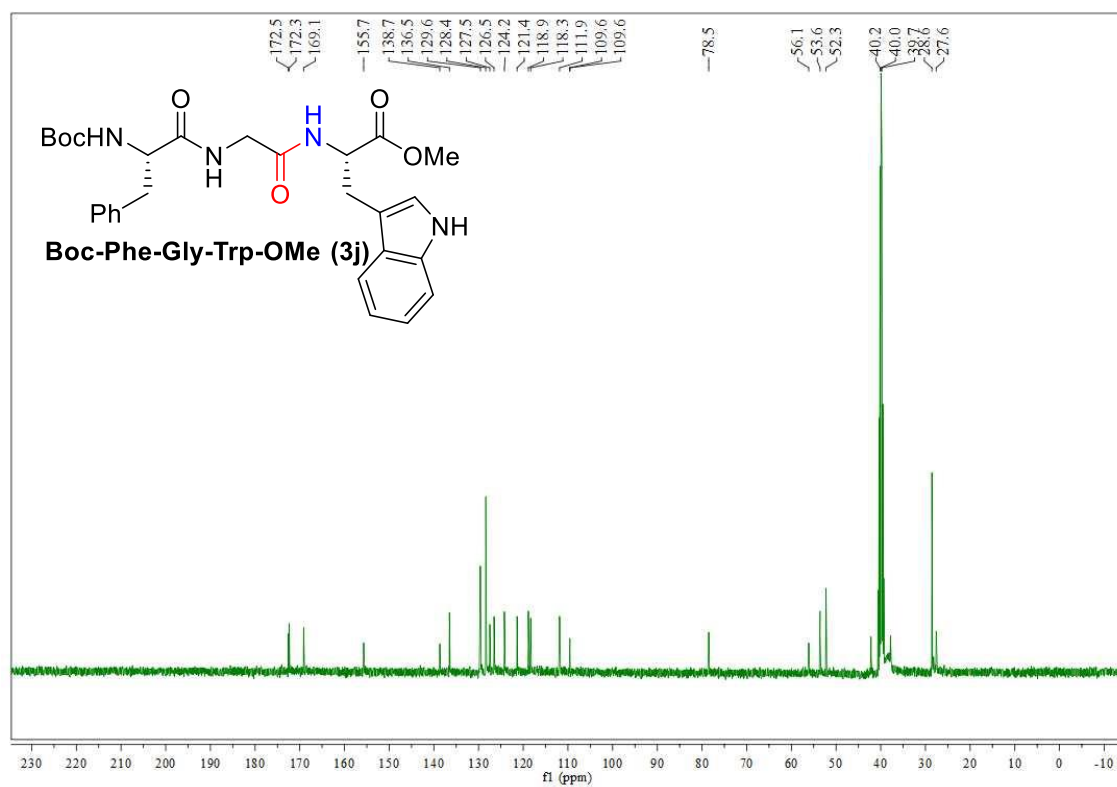

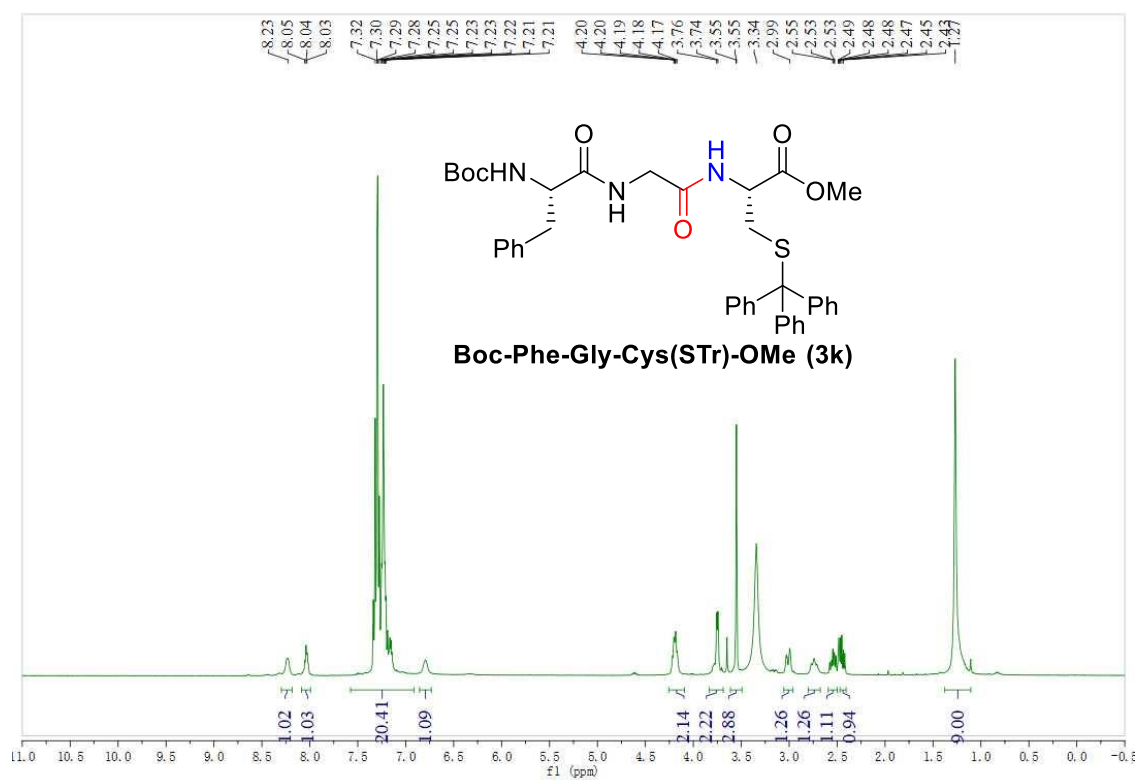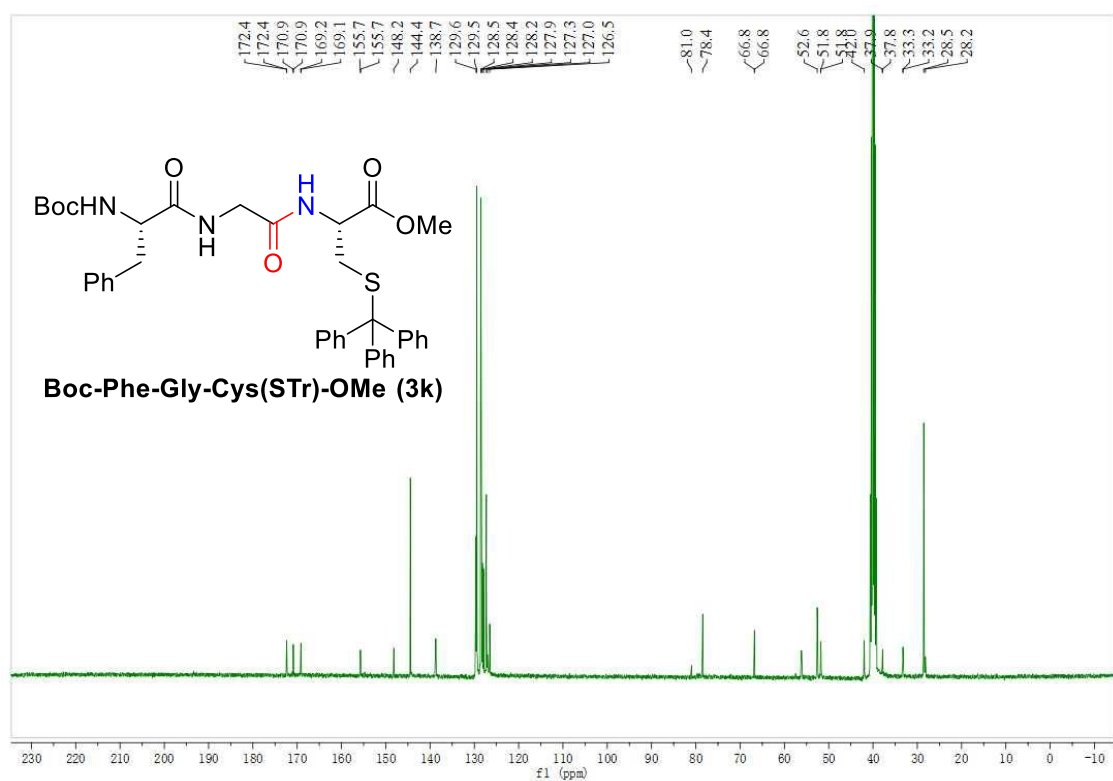

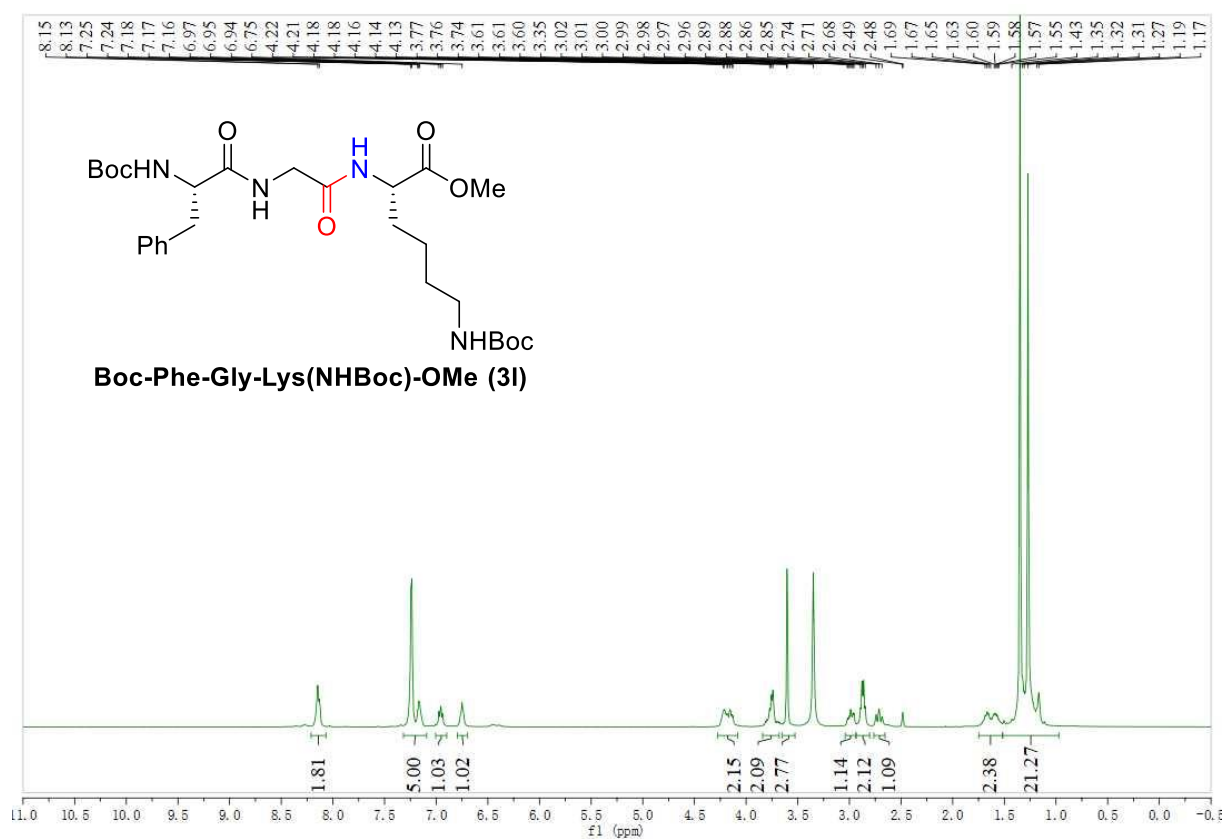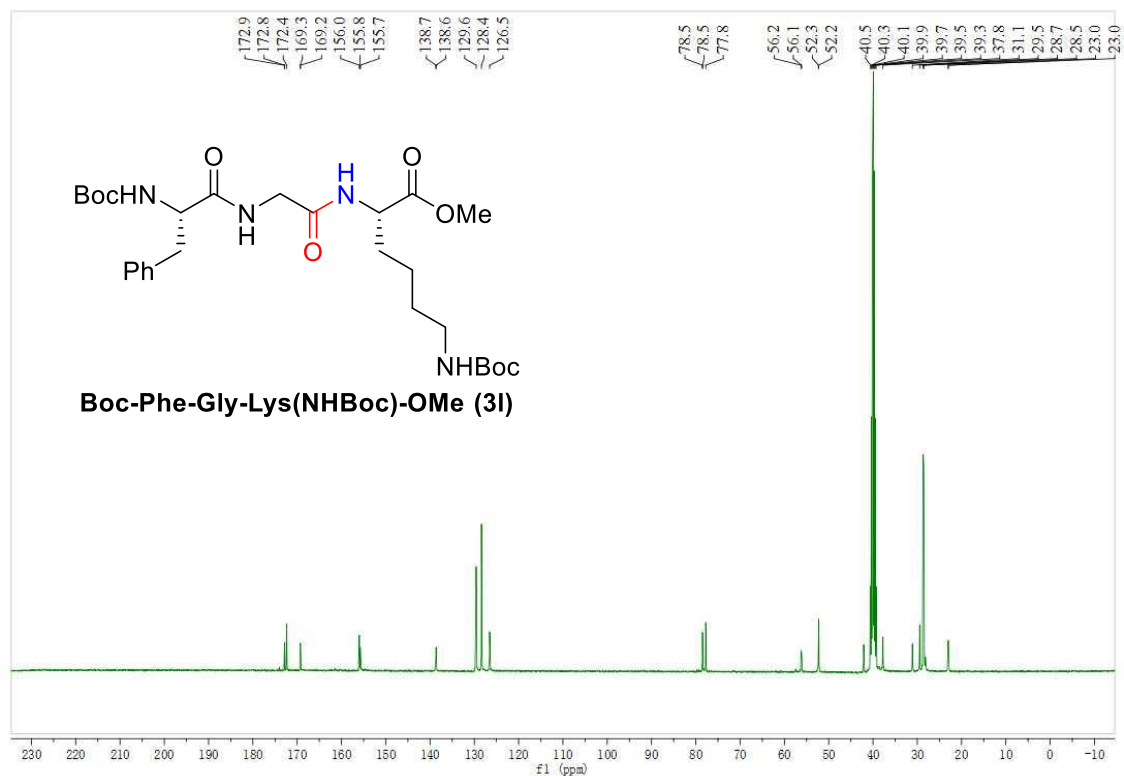

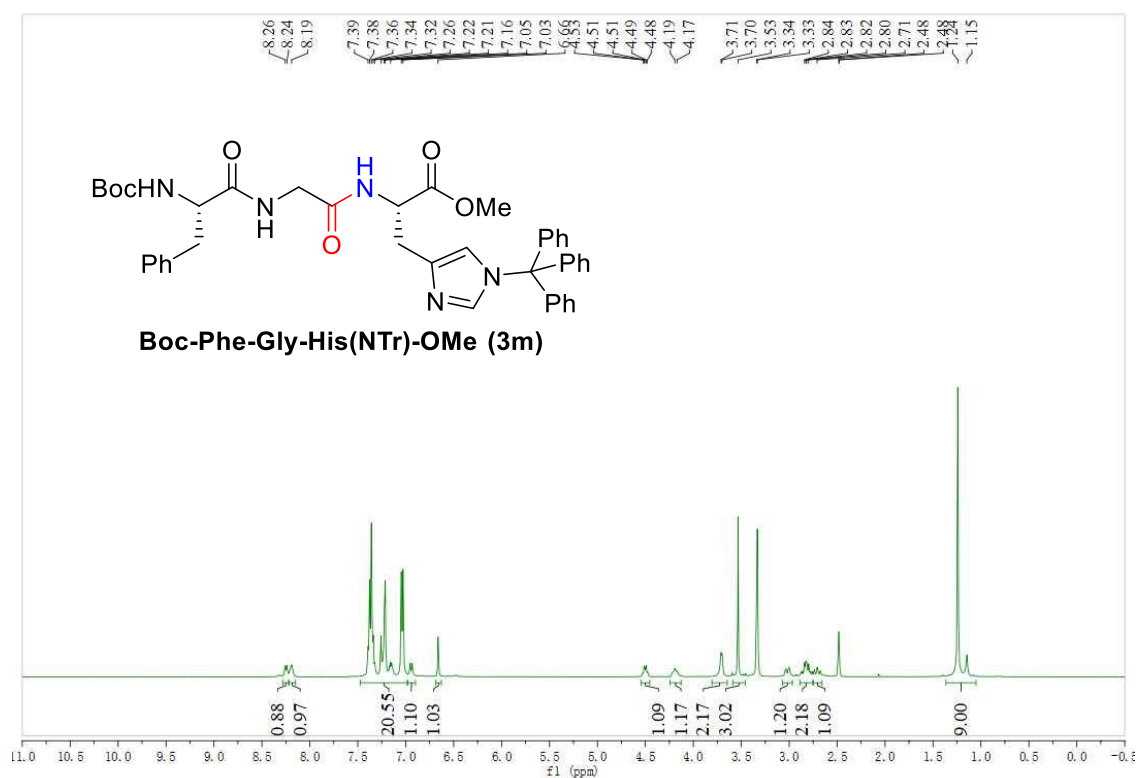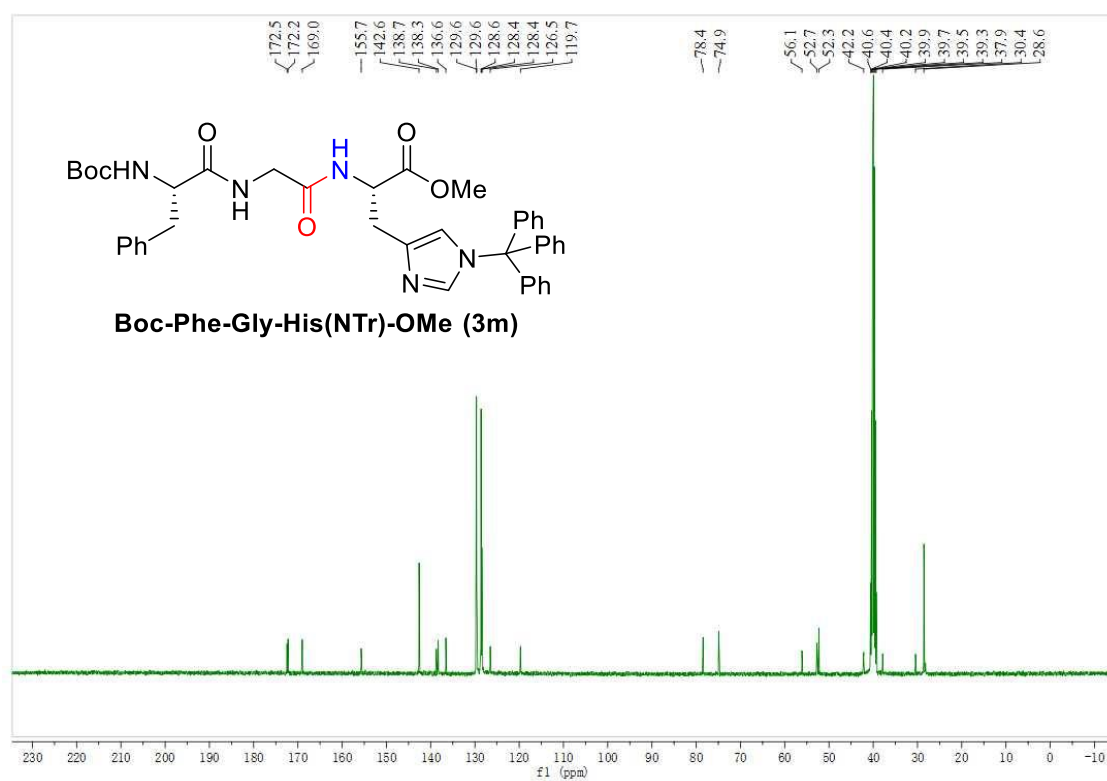

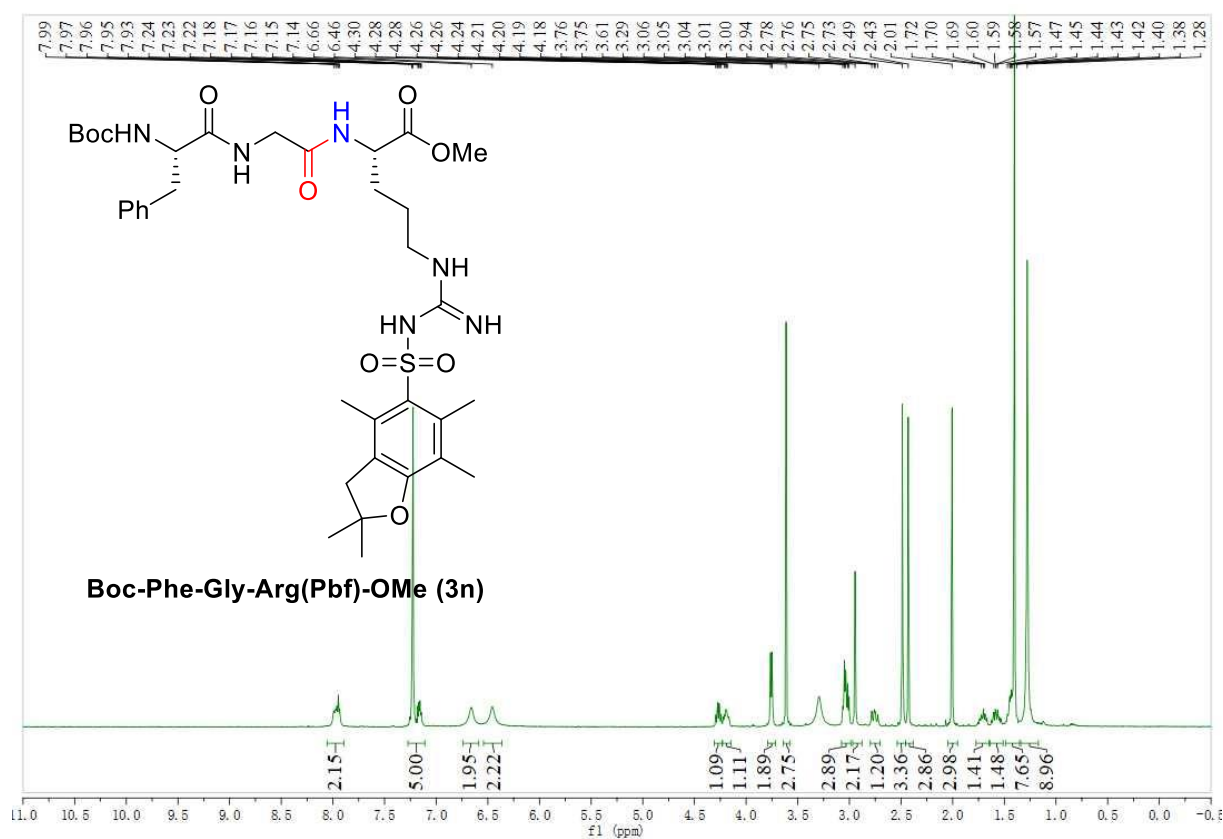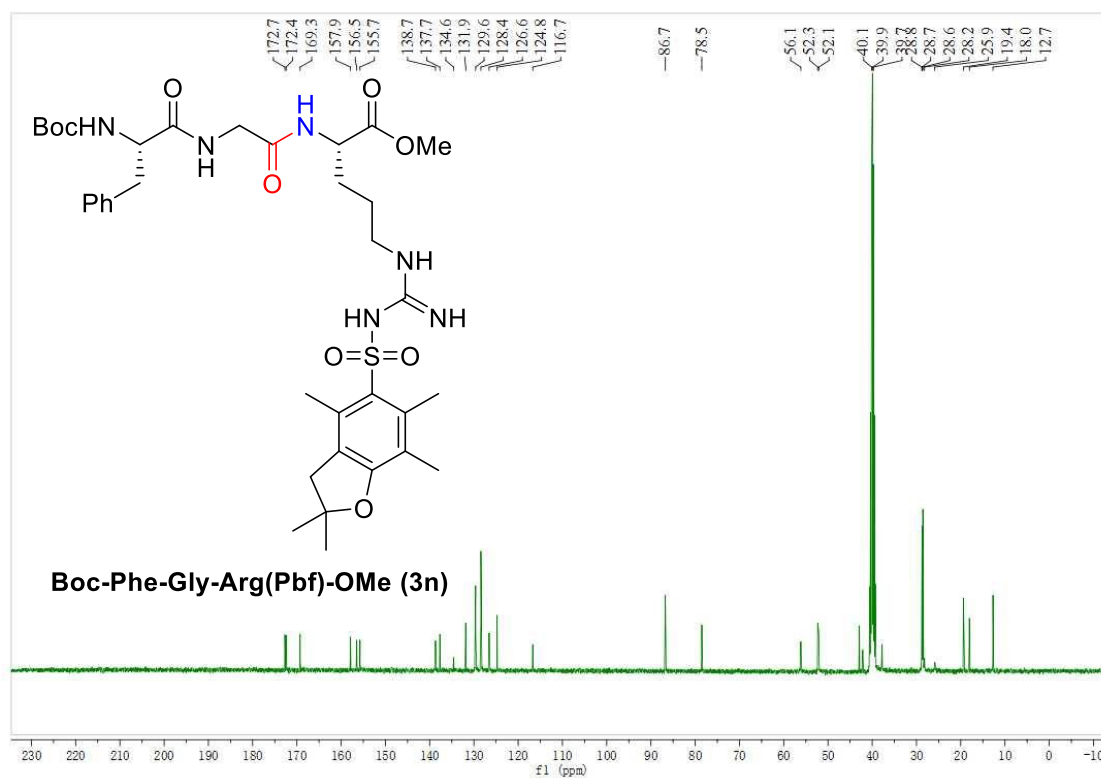

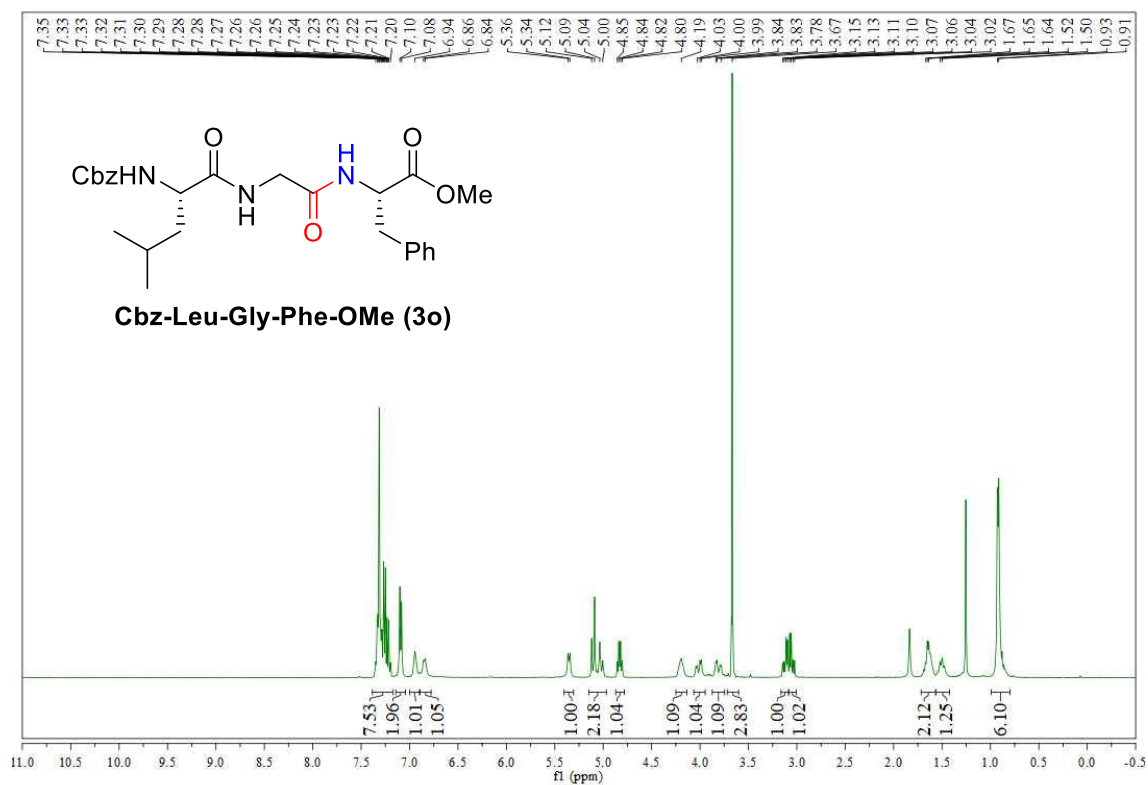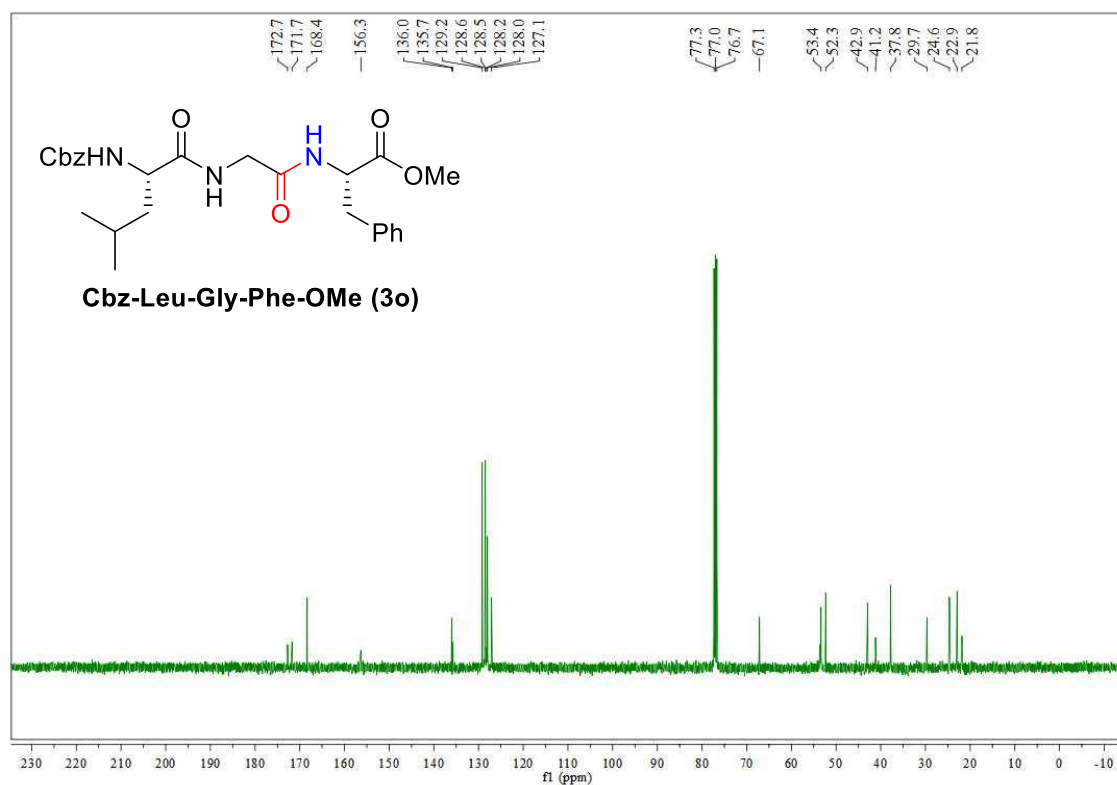

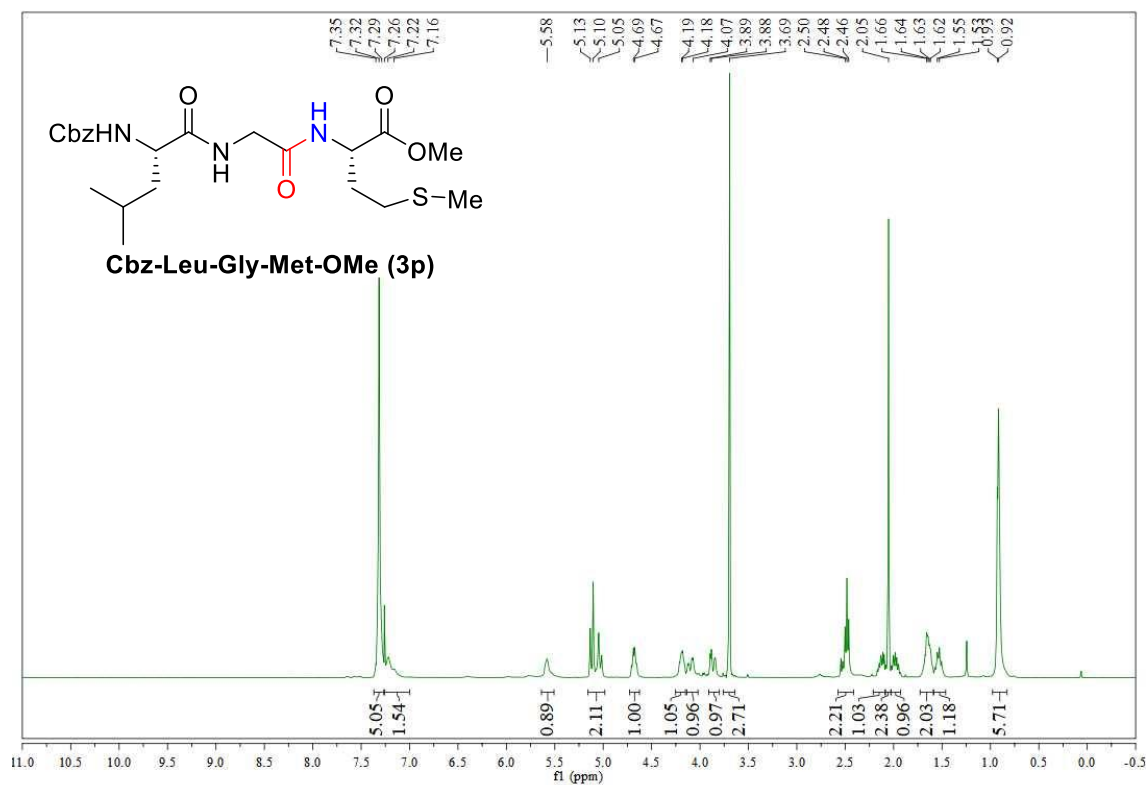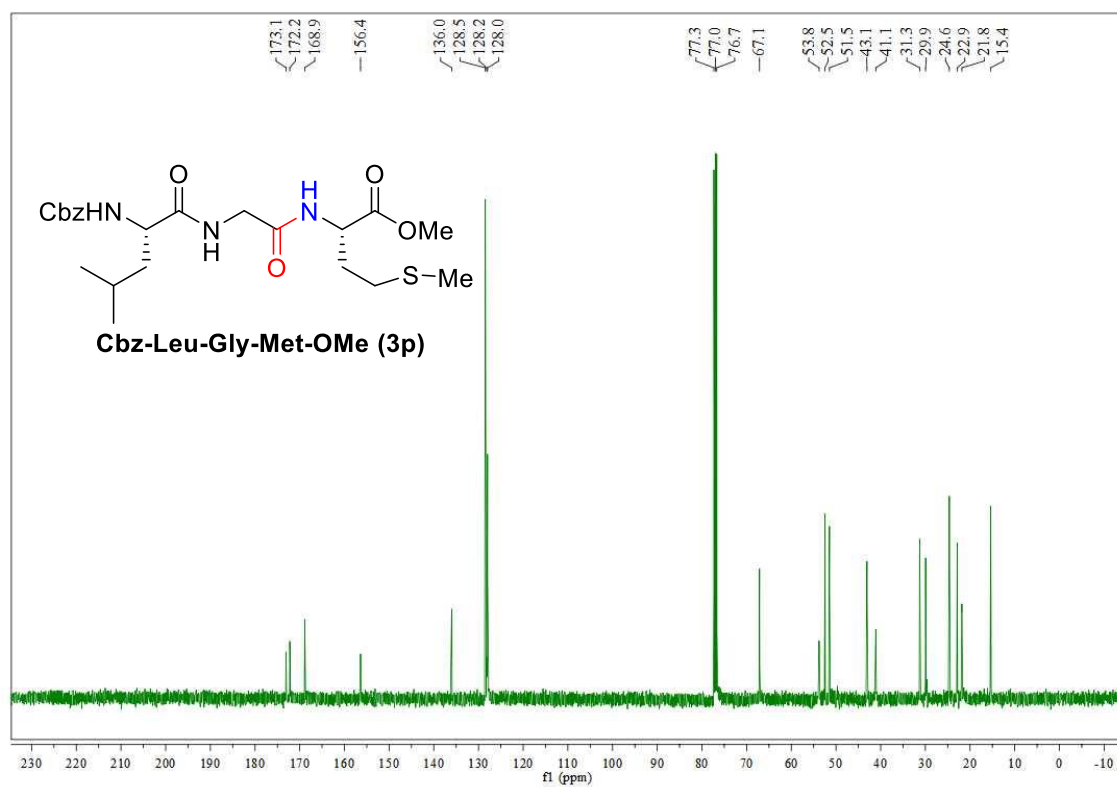

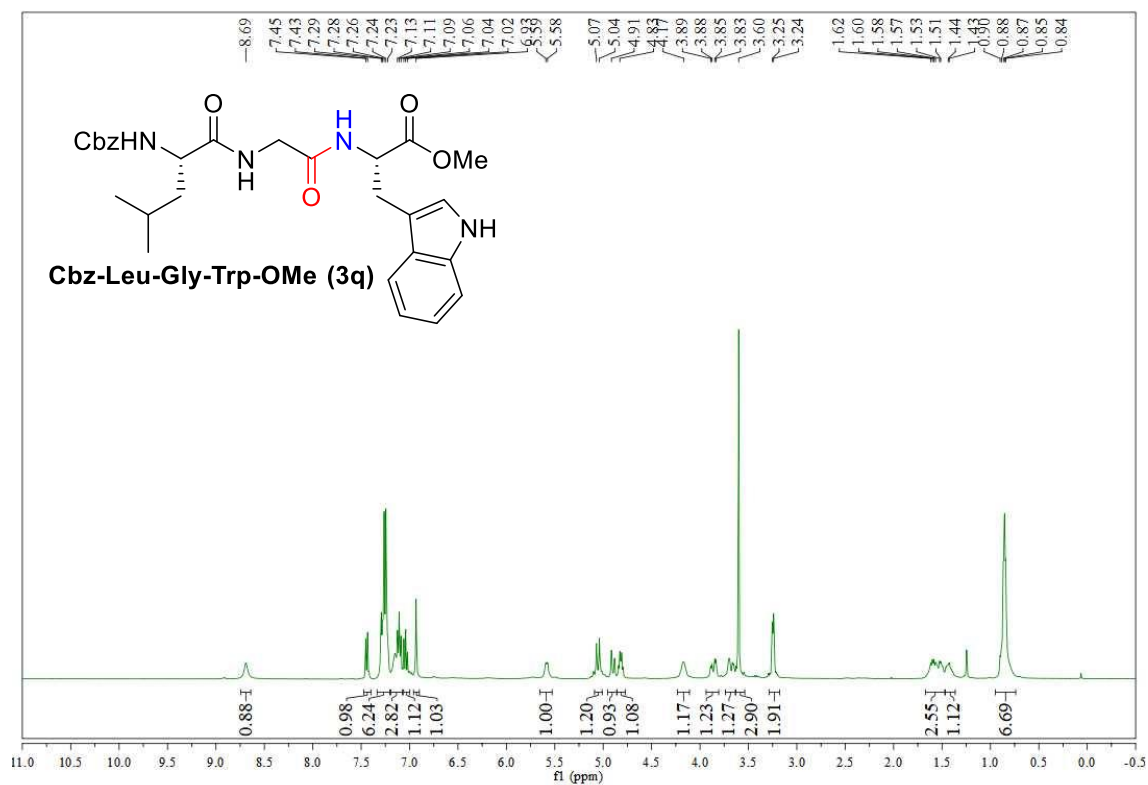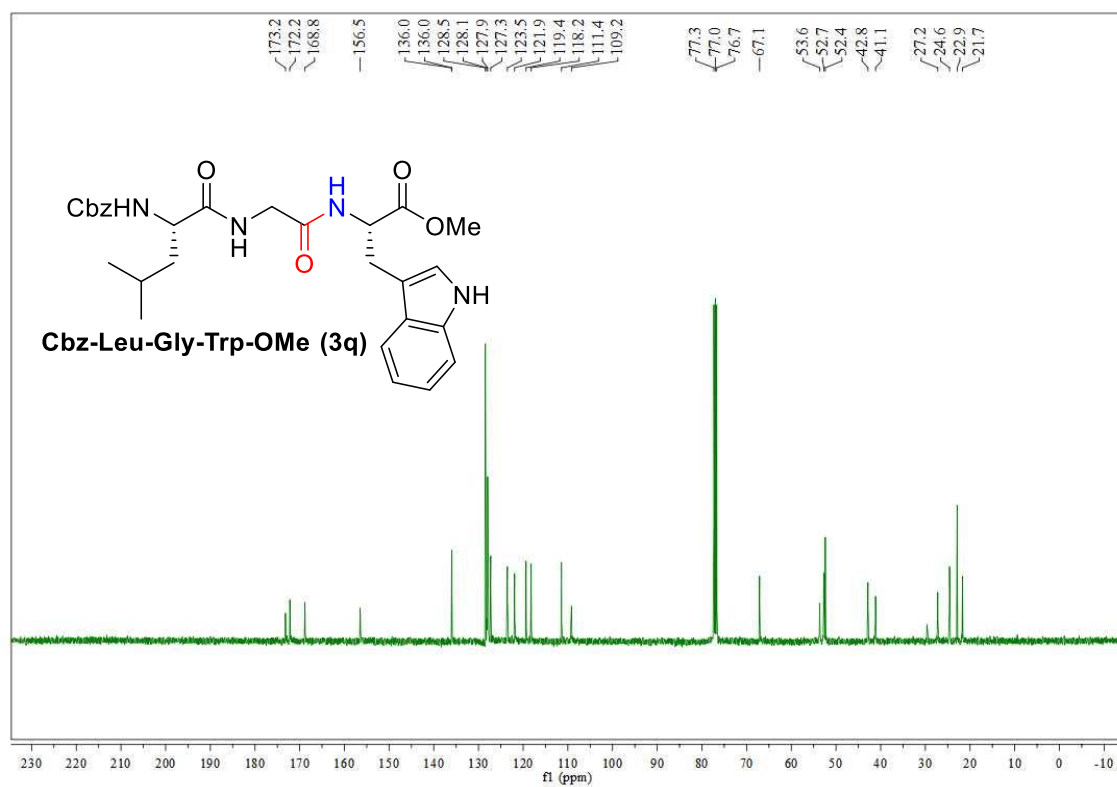

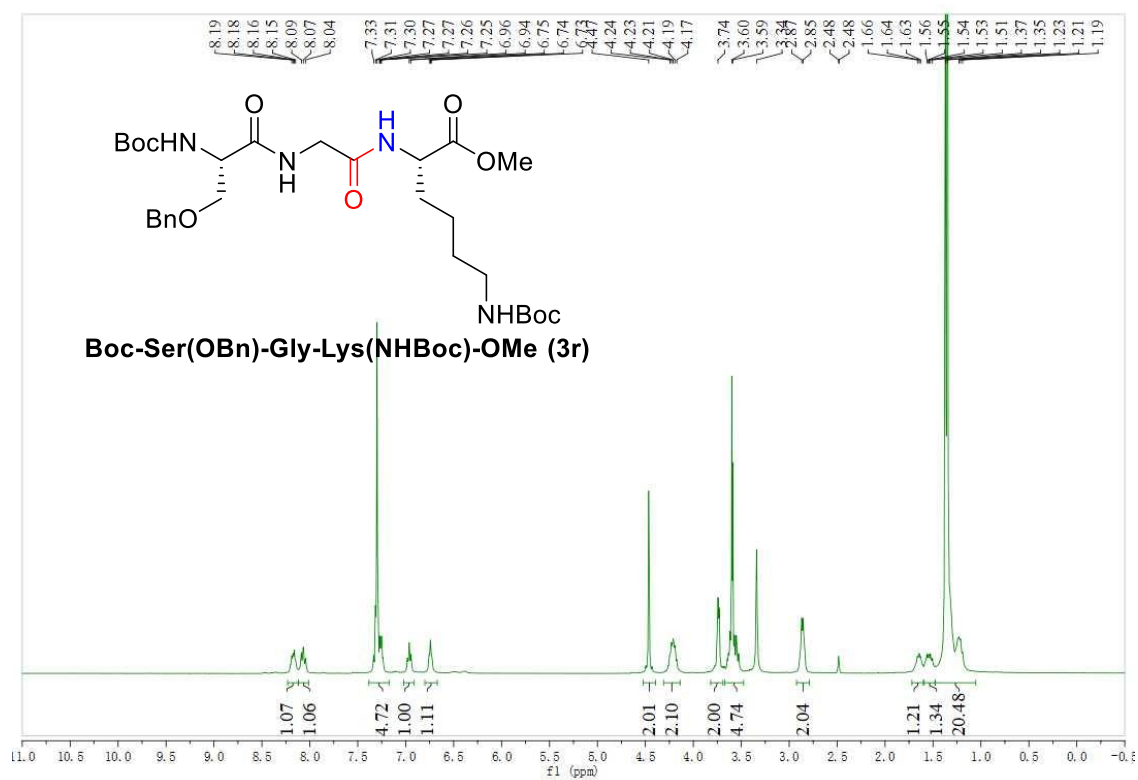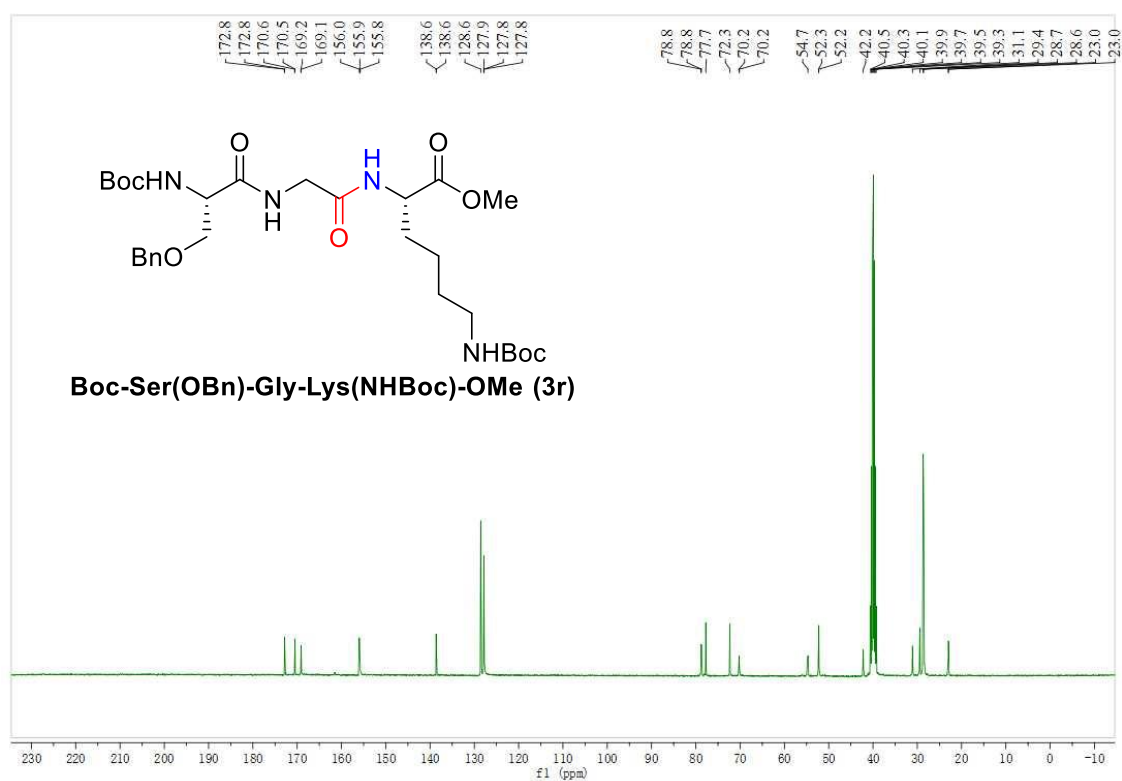

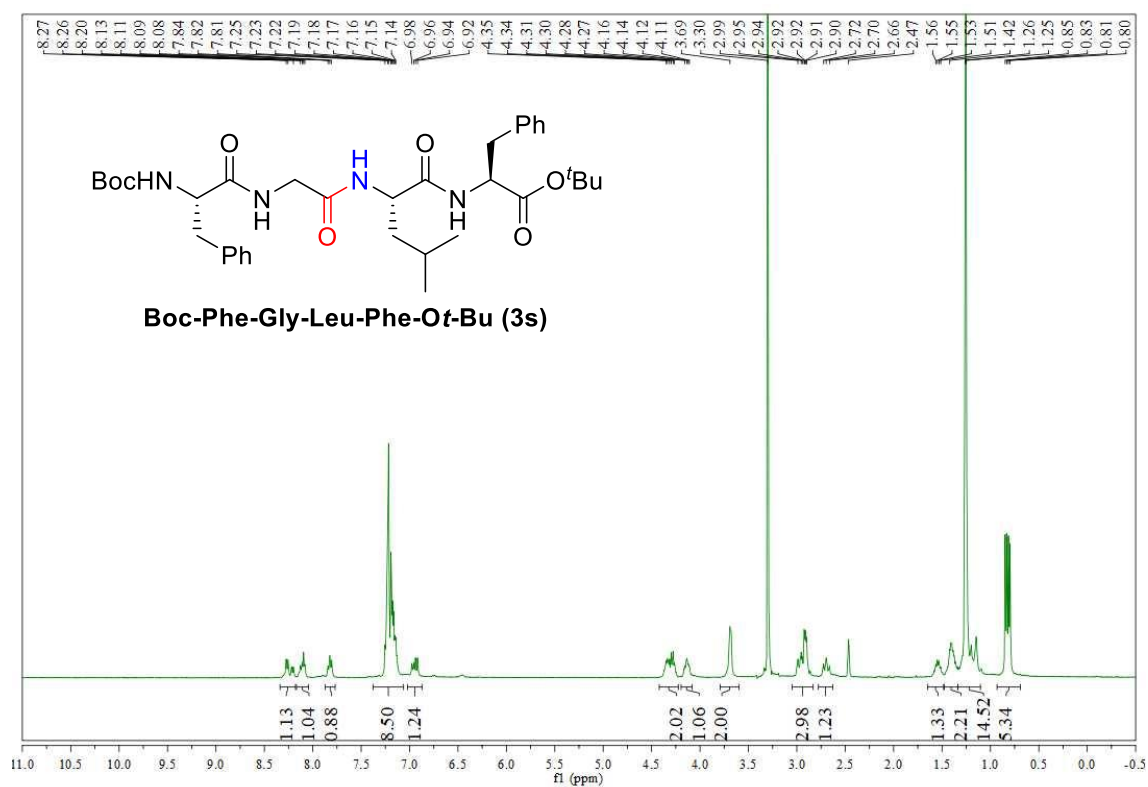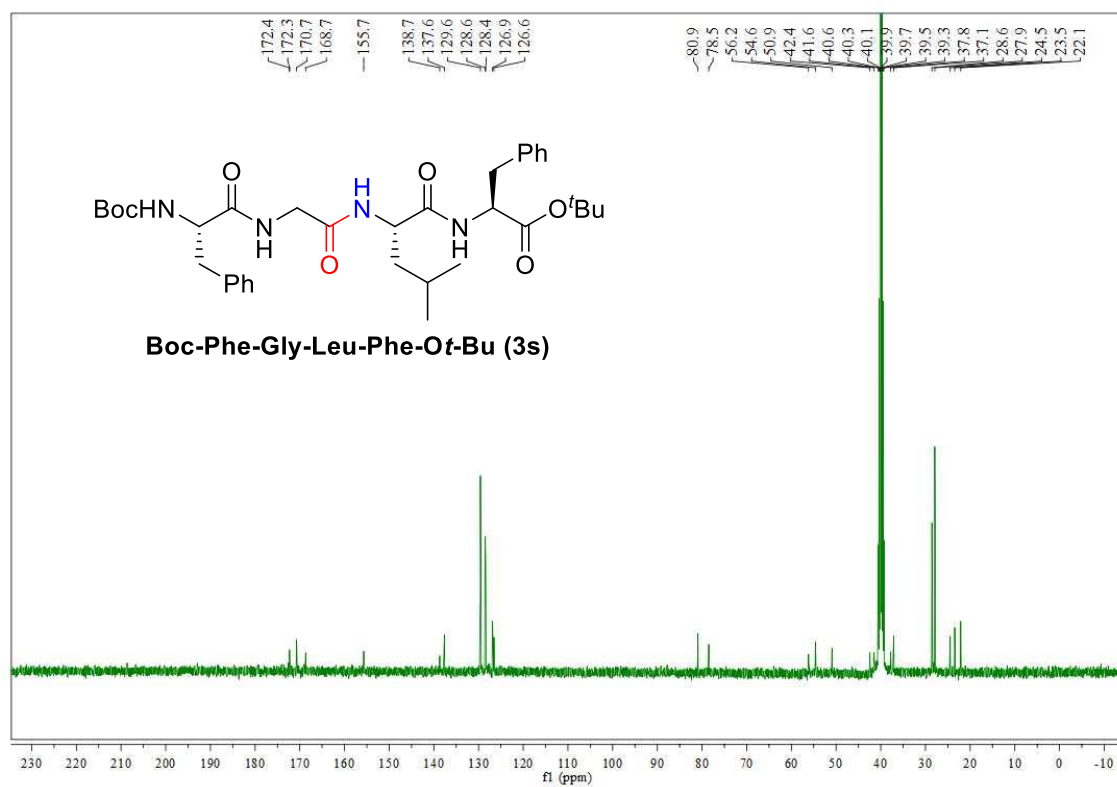

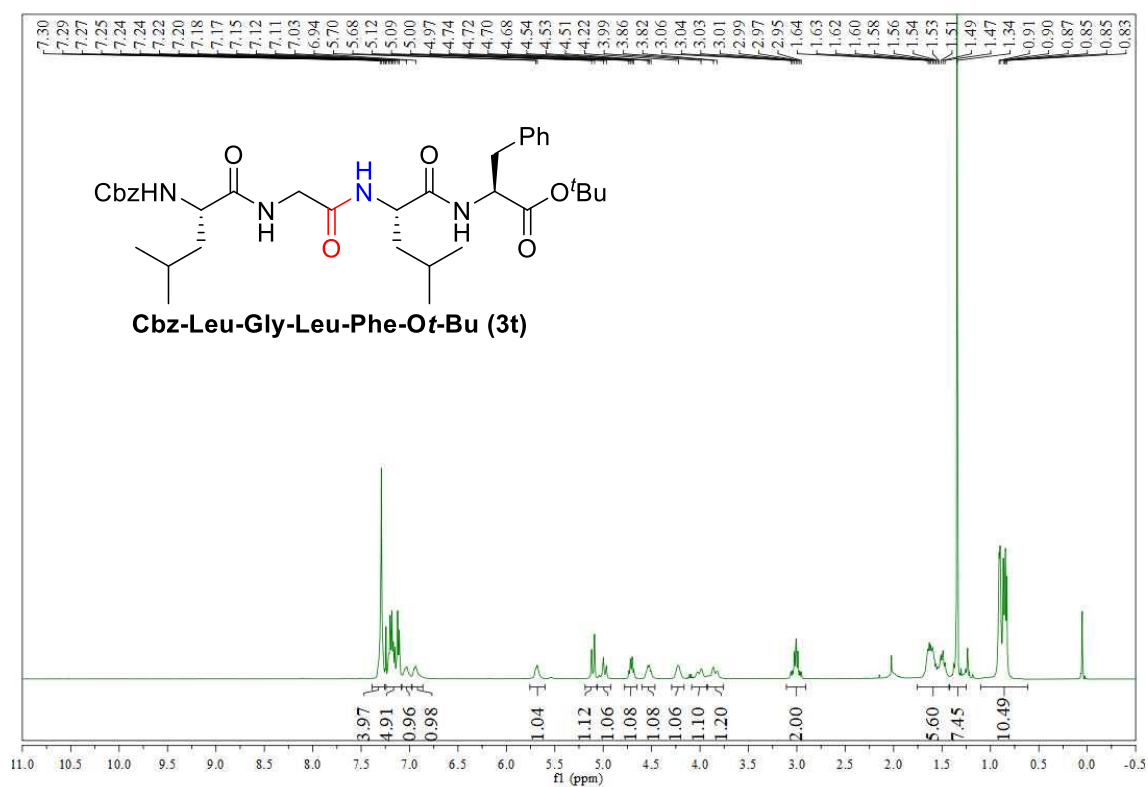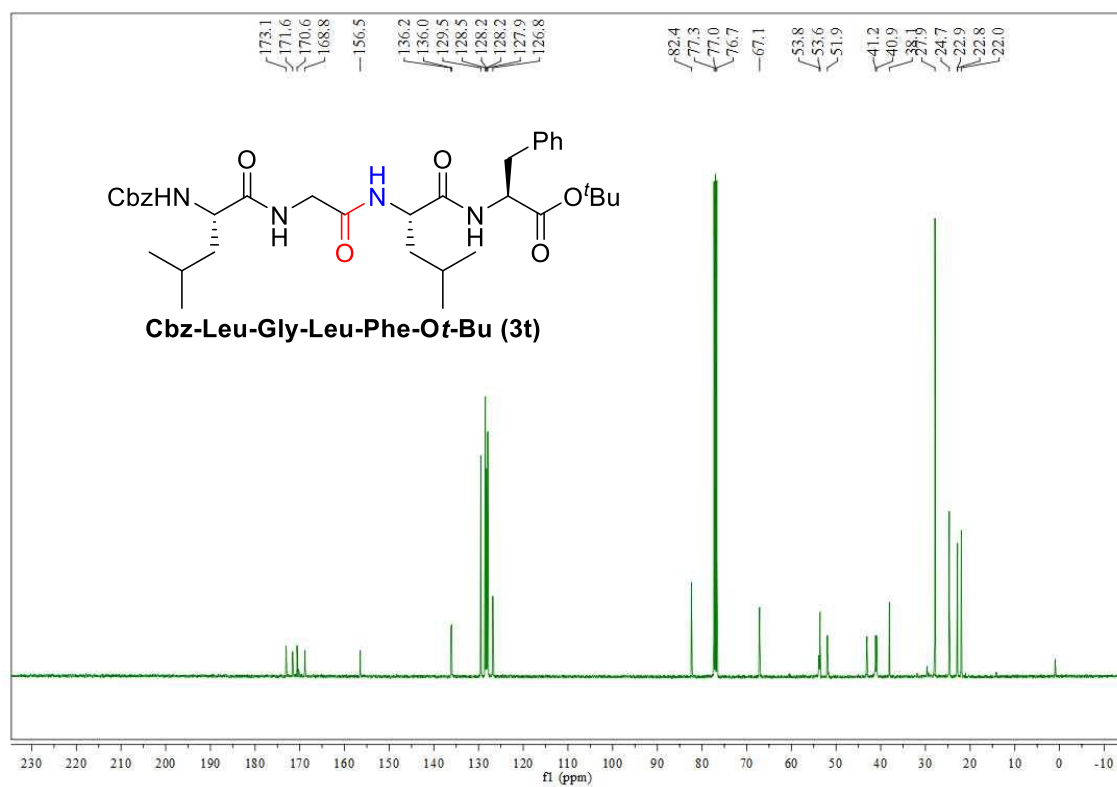

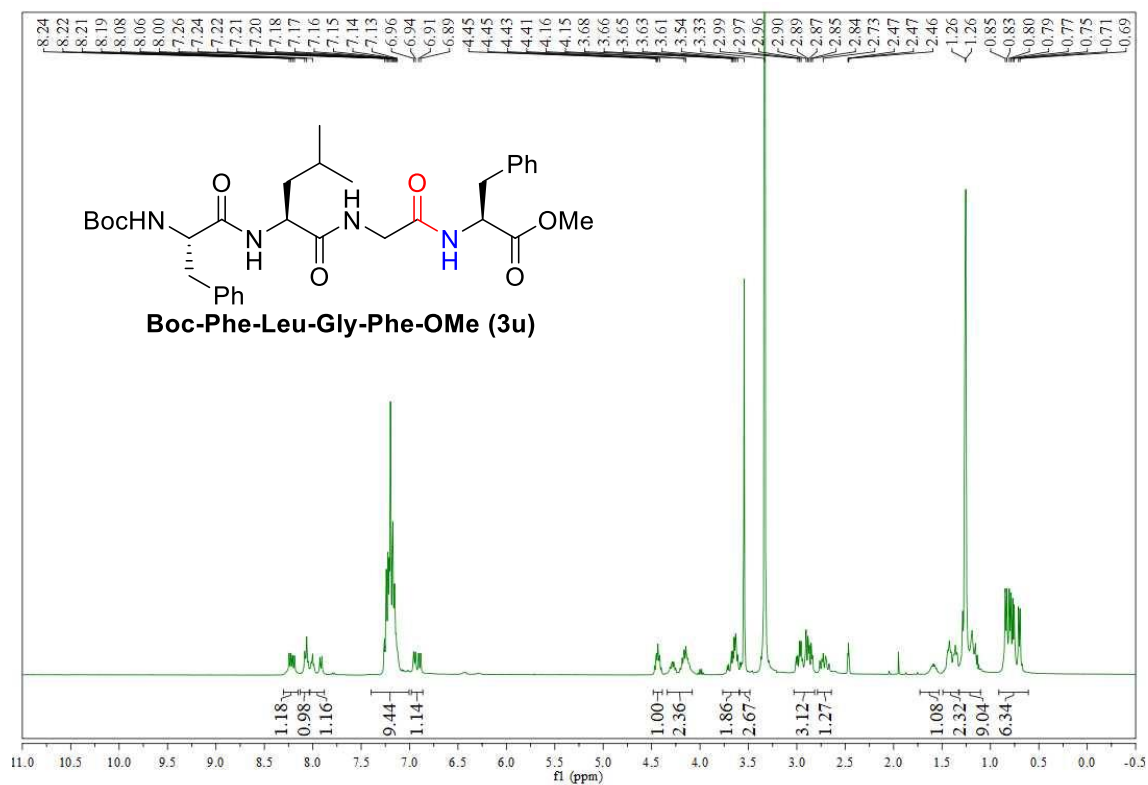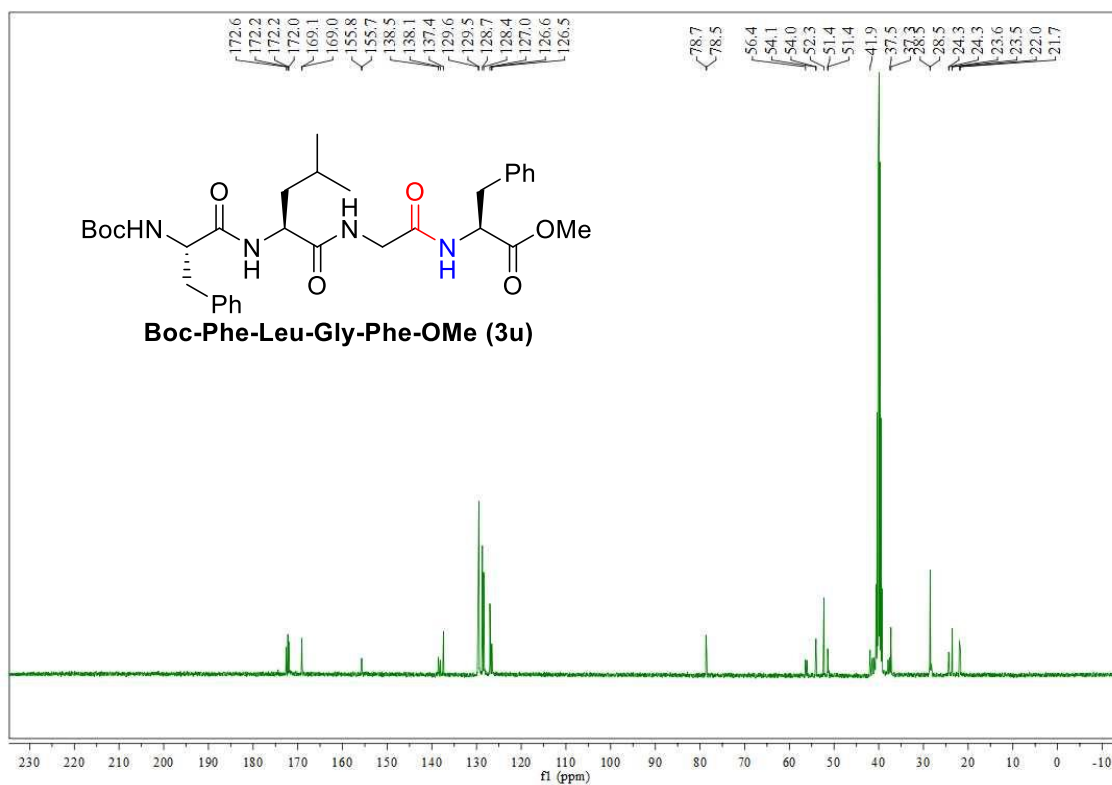

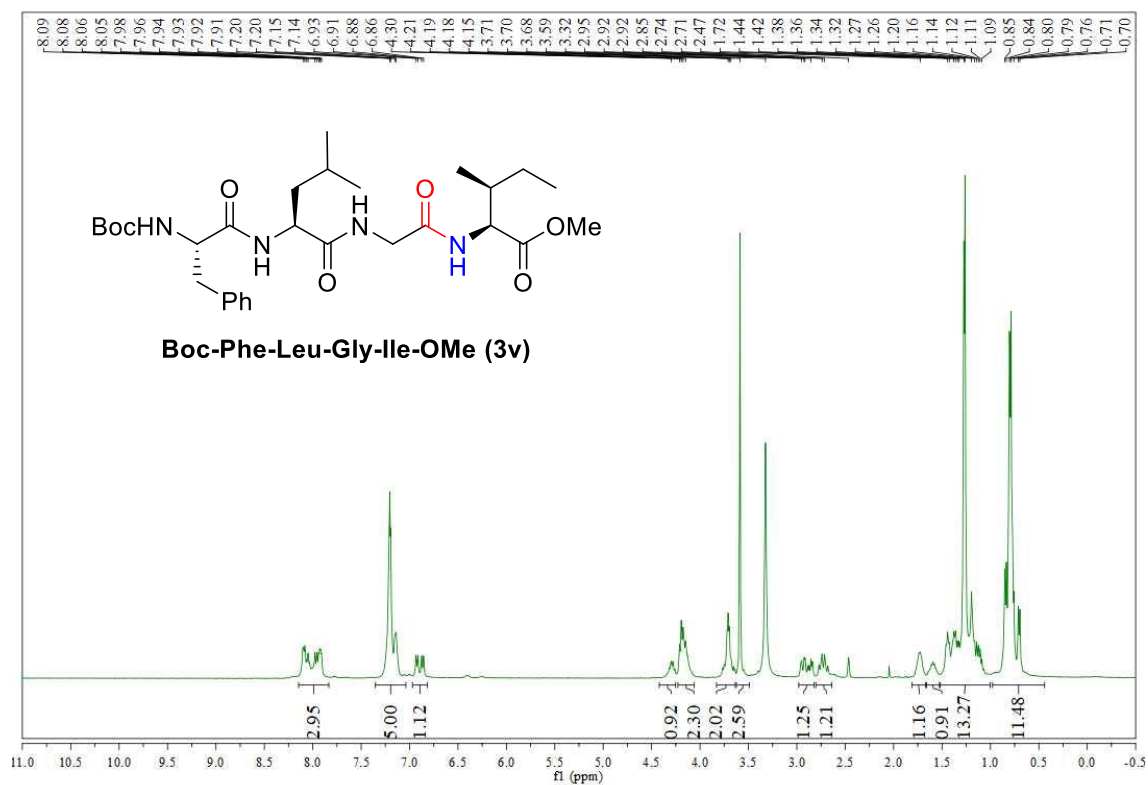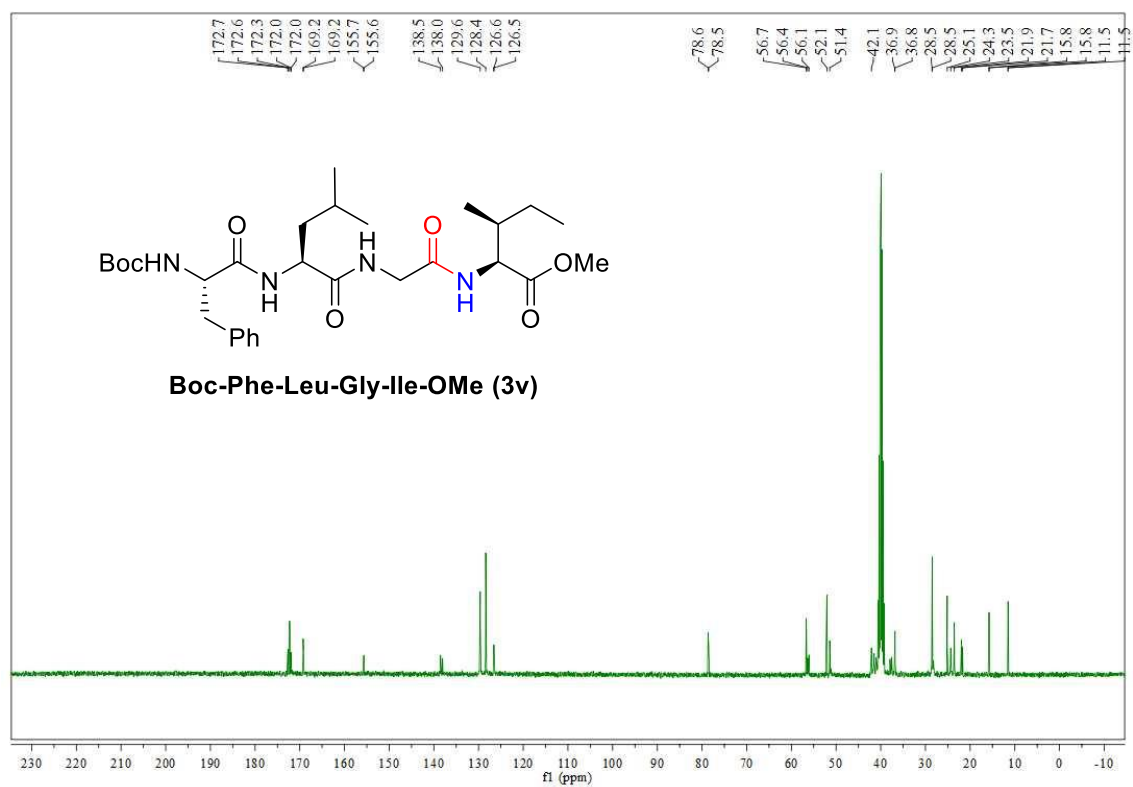

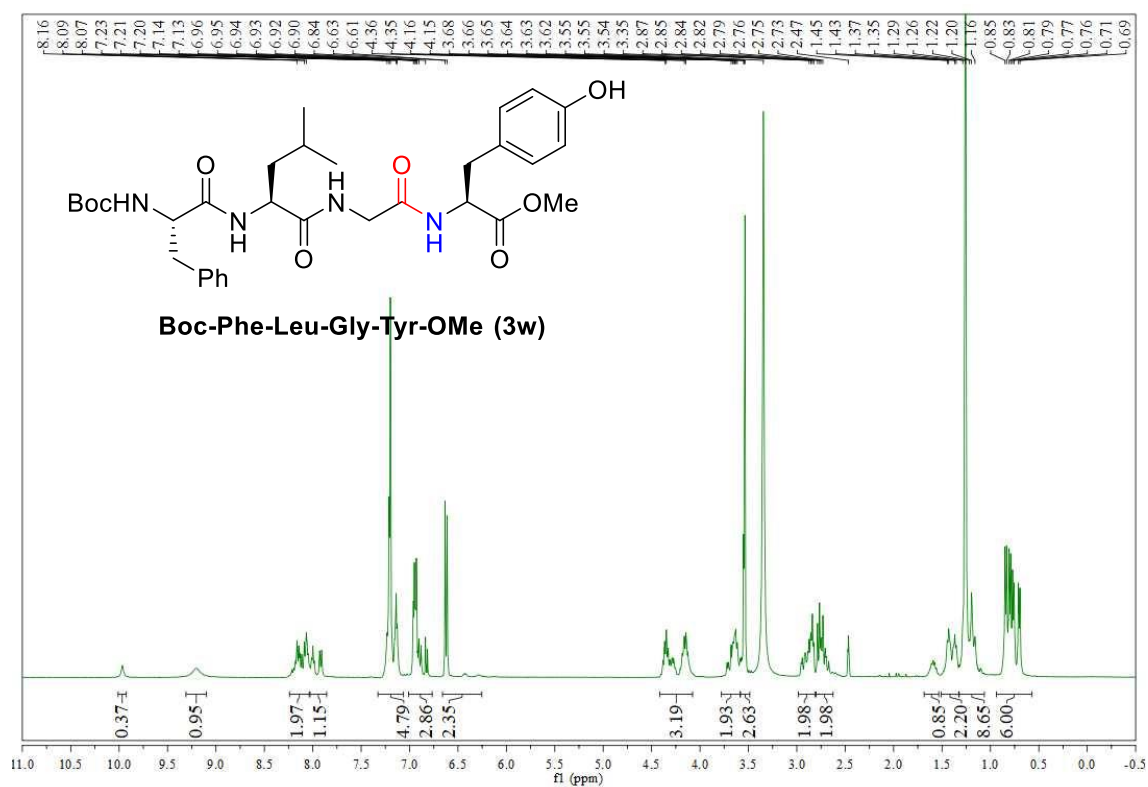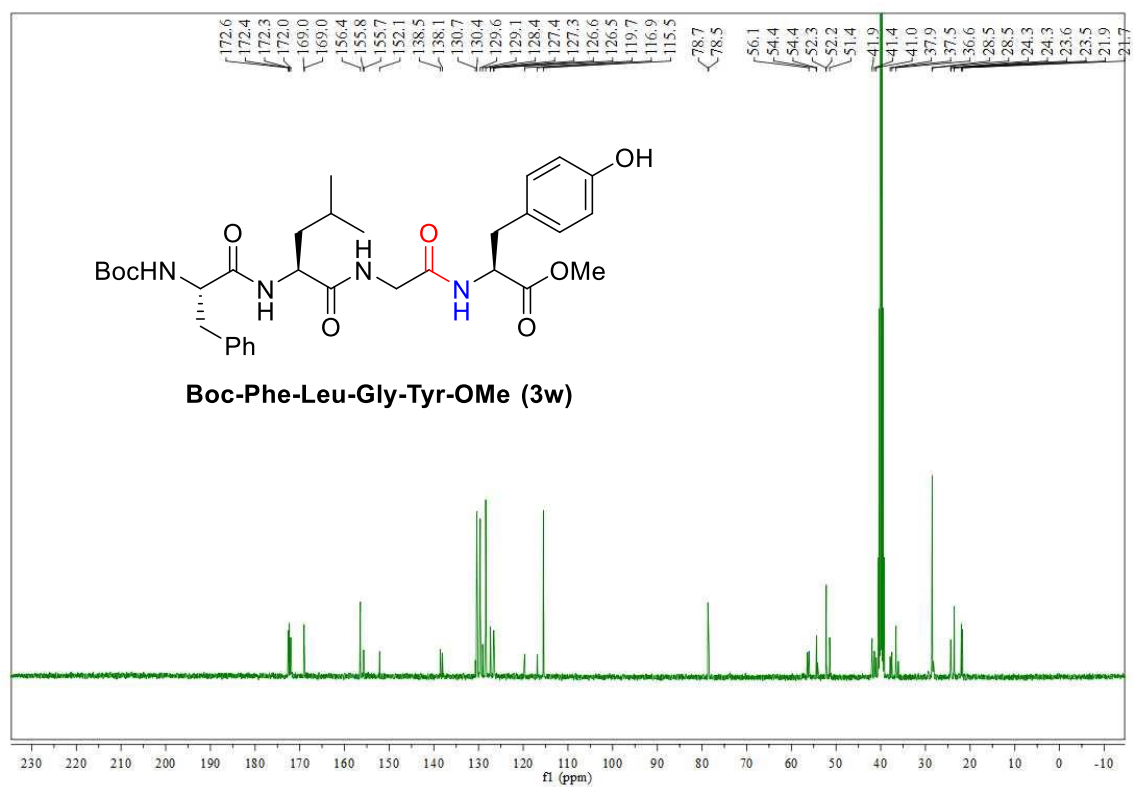

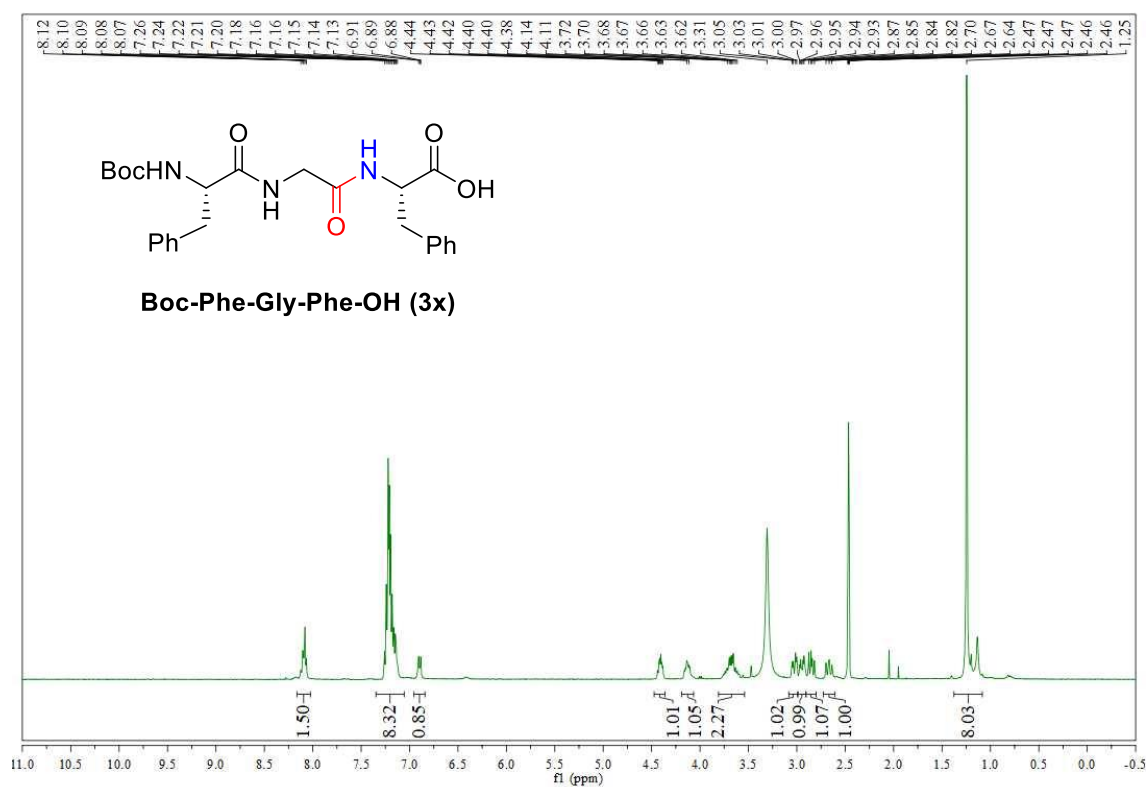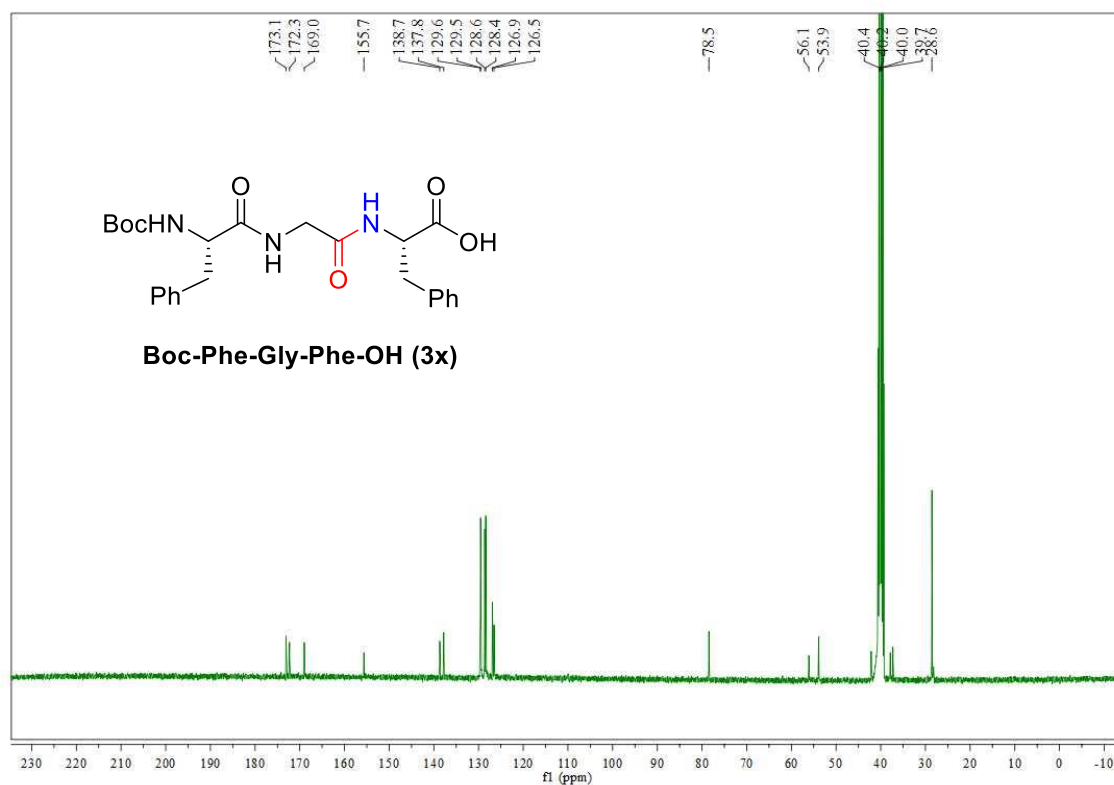

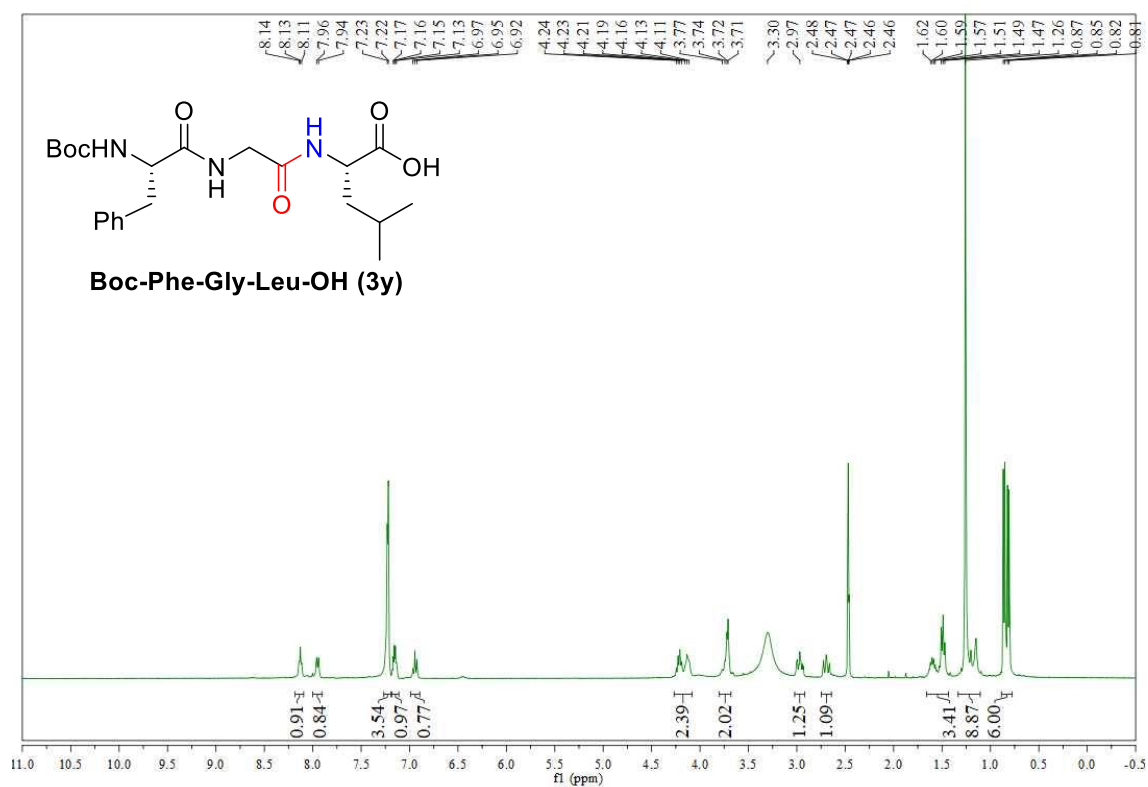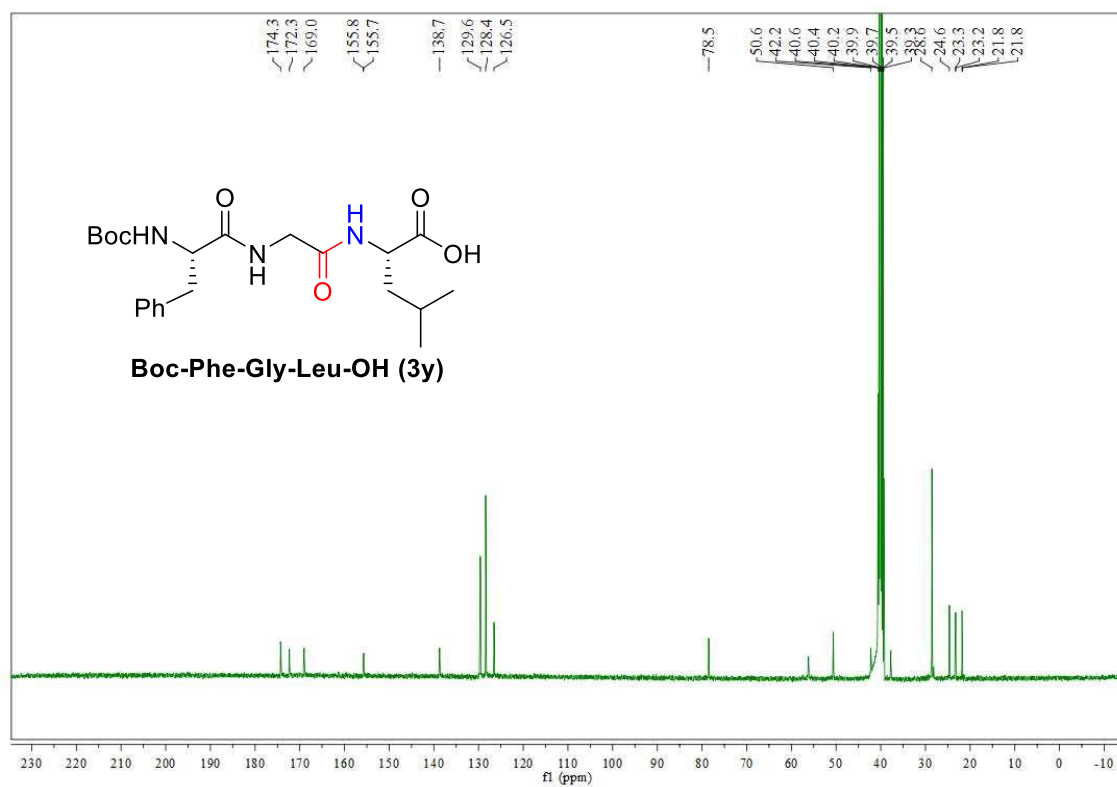

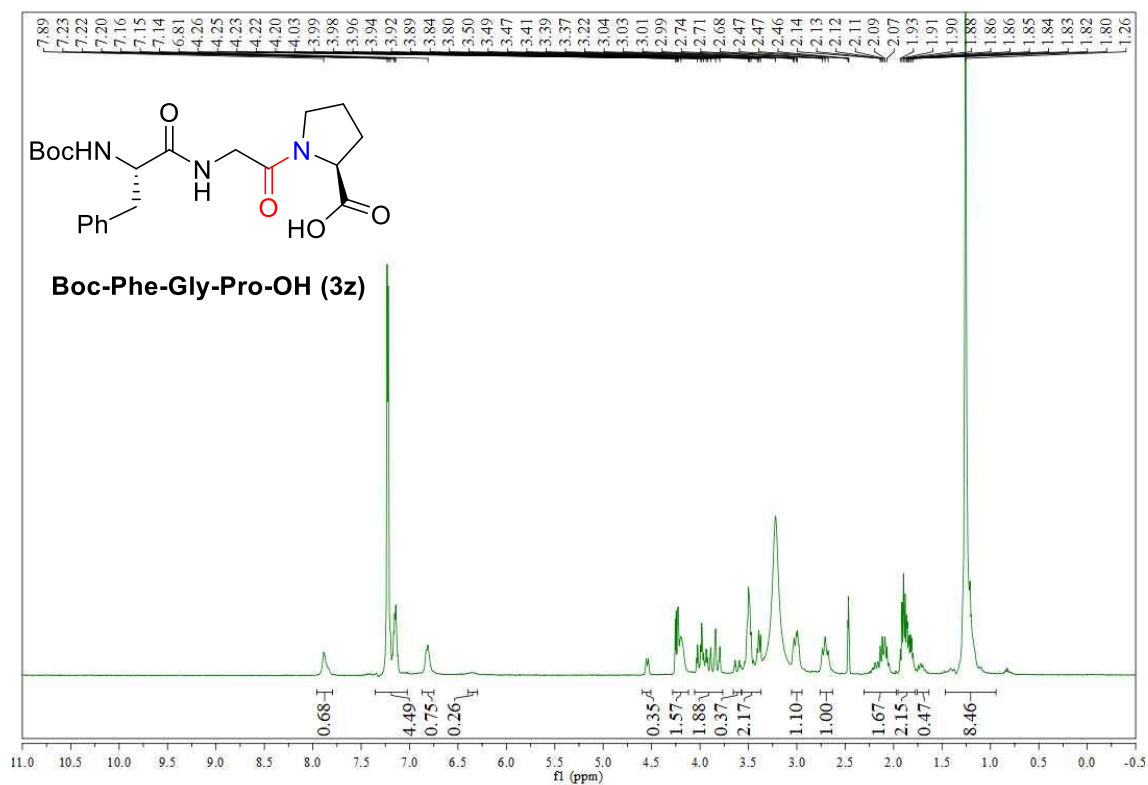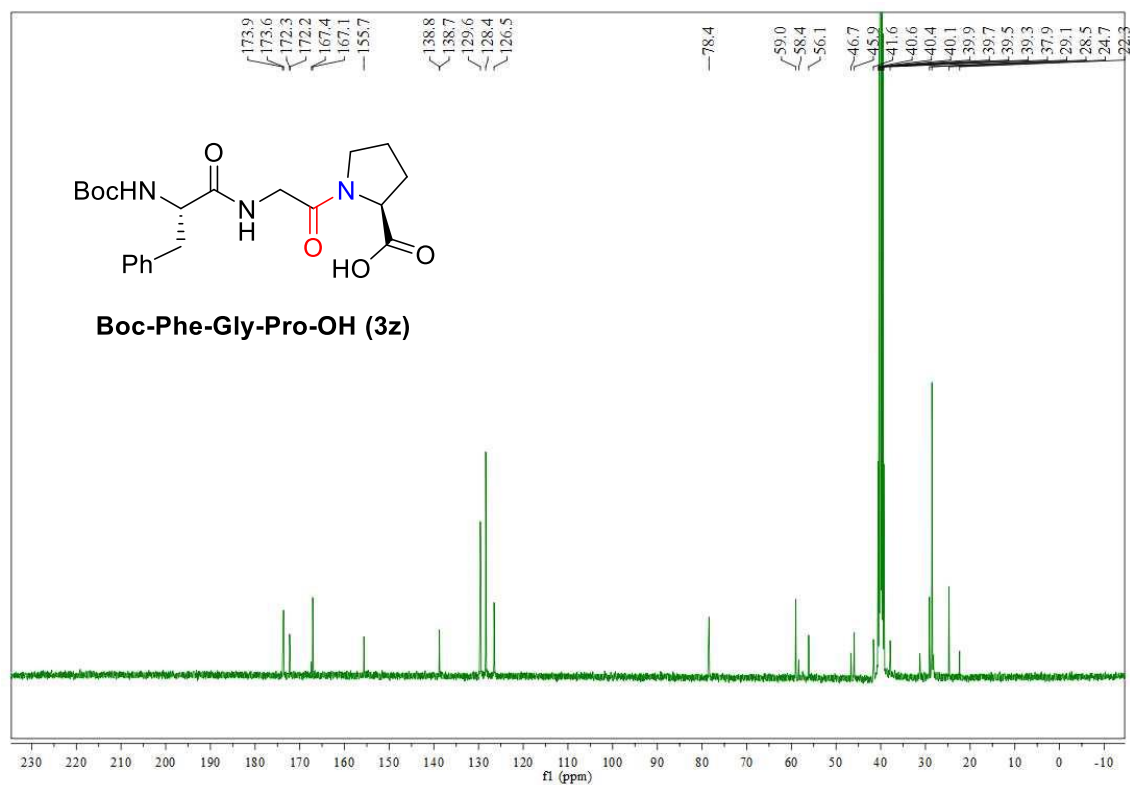

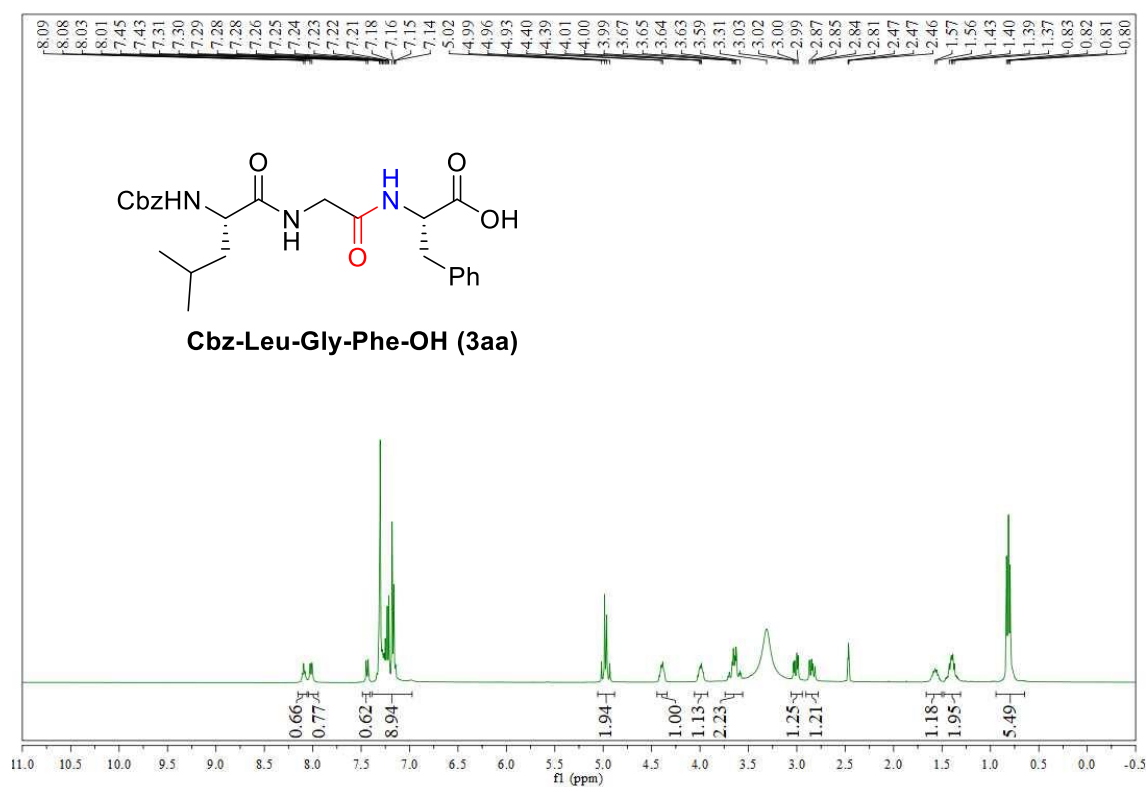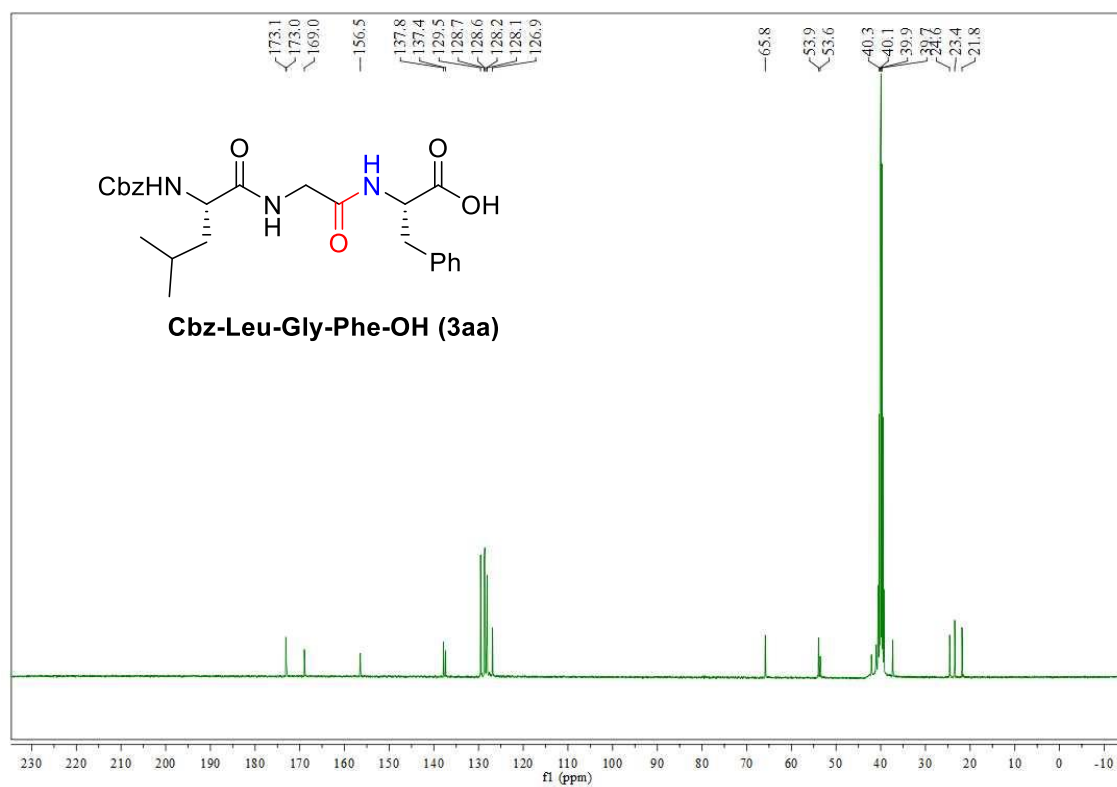

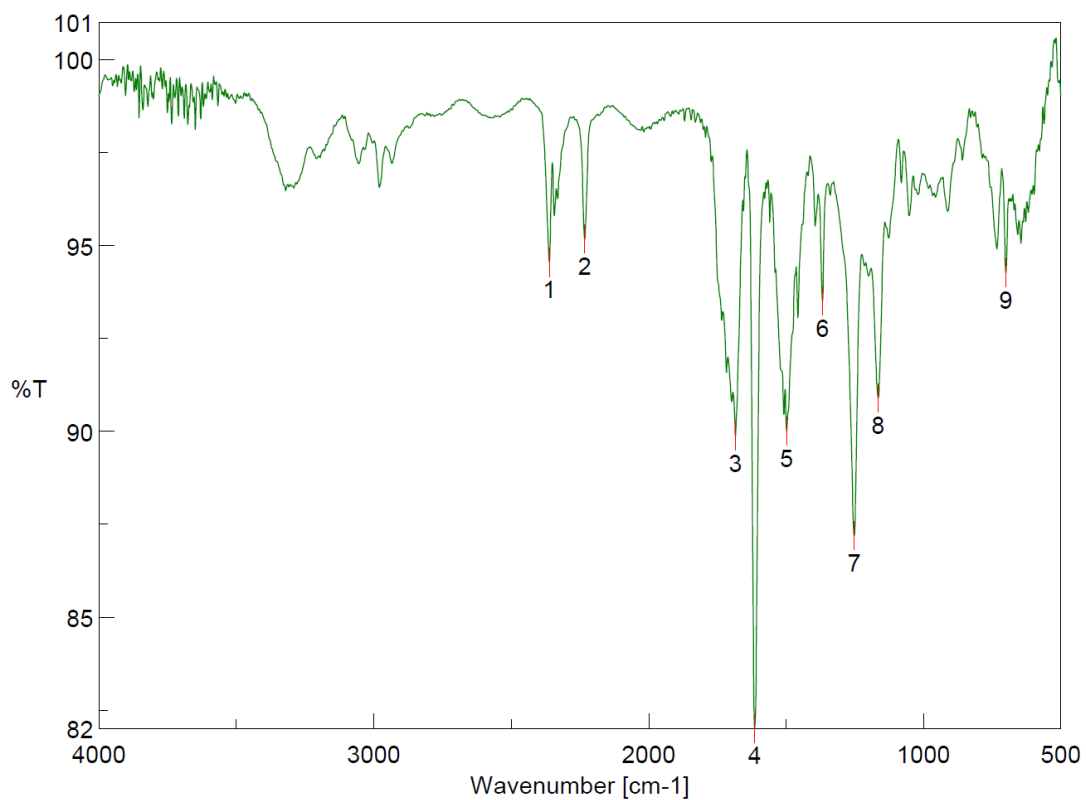

[ ピーク検出結果 ]

| No. | 位置      | 強度      | No. | 位置      | 強度      |
|-----|---------|---------|-----|---------|---------|
| 1   | 2361.41 | 94.5398 | 2   | 2233.16 | 95.1702 |
| 3   | 1683.55 | 89.8756 | 4   | 1614.13 | 82.0058 |
| 5   | 1497.45 | 89.9942 | 6   | 1367.28 | 93.5045 |
| 7   | 1251.58 | 87.1849 | 8   | 1164.79 | 90.8964 |
| 9   | 700.034 | 94.2641 |     |         |         |

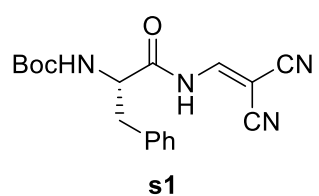

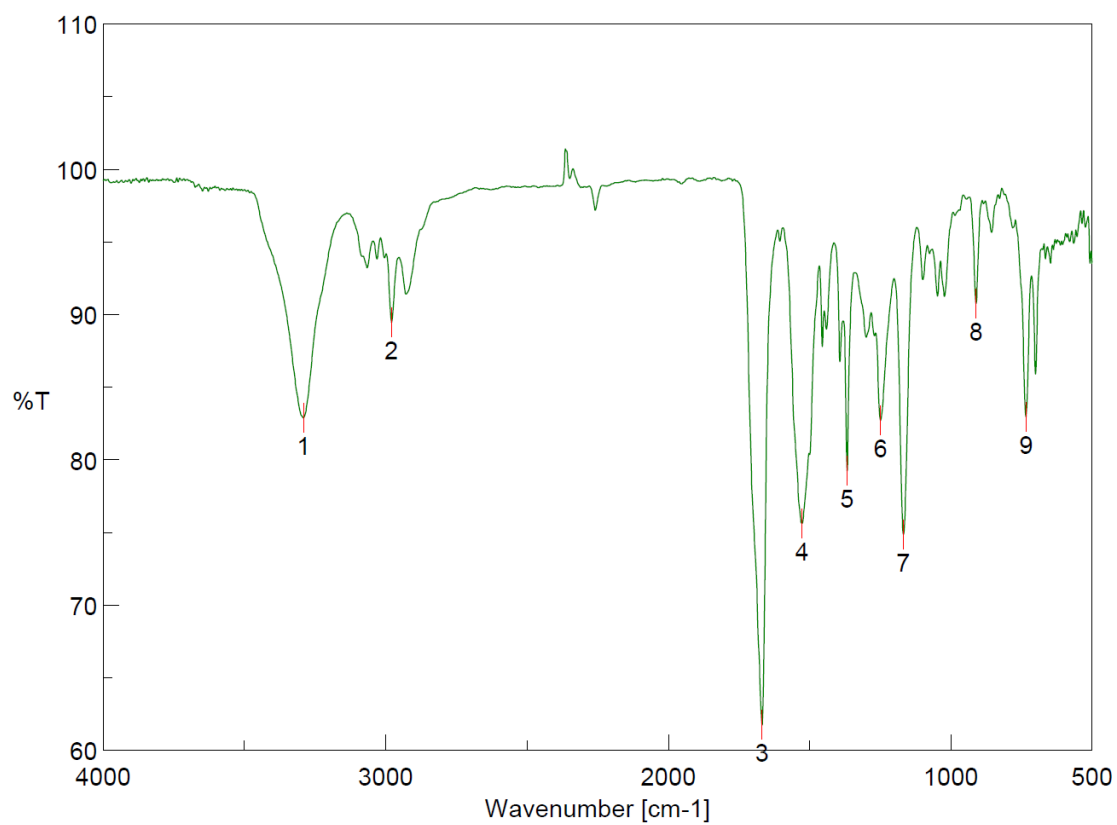

【ピーク検出結果】

| No. | 位置      | 強度      | No. | 位置      | 強度      |
|-----|---------|---------|-----|---------|---------|
| 1   | 3290.93 | 82.8717 | 2   | 2979.48 | 89.4431 |
| 3   | 1668.12 | 61.7319 | 4   | 1526.38 | 75.6103 |
| 5   | 1367.28 | 79.2345 | 6   | 1248.68 | 82.6922 |
| 7   | 1167.69 | 74.8617 | 8   | 910.236 | 90.744  |
| 9   | 733.782 | 82.9559 |     |         |         |

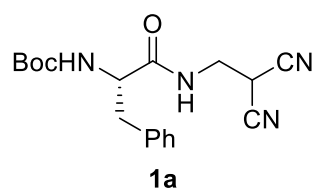

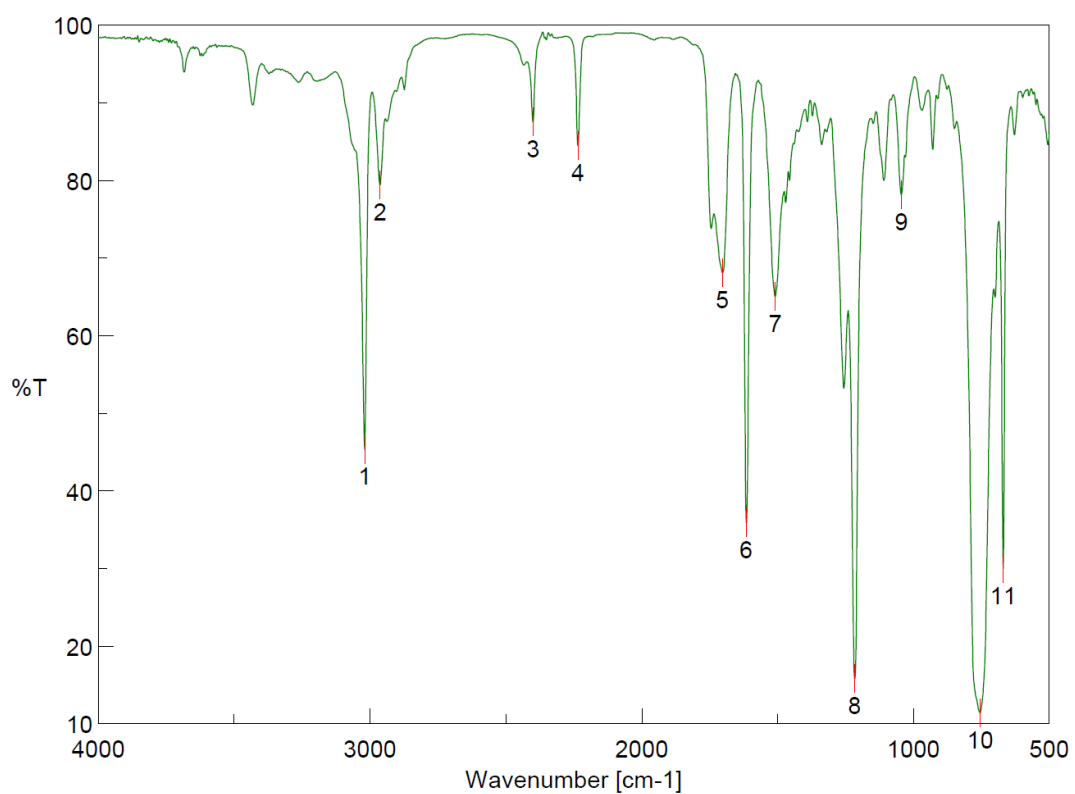

[ ピーク検出結果 ]

| No. | 位置      | 強度      | No. | 位置      | 強度      |
|-----|---------|---------|-----|---------|---------|
| 1   | 3019.98 | 45.3128 | 2   | 2963.09 | 79.3906 |
| 3   | 2399.98 | 87.4939 | 4   | 2235.09 | 84.4156 |
| 5   | 1702.84 | 68.0827 | 6   | 1615.09 | 35.88   |
| 7   | 1508.06 | 64.9972 | 8   | 1215.9  | 15.752  |
| 9   | 1044.26 | 78.0936 | 10  | 754.031 | 11.349  |
| 11  | 669.178 | 29.9544 |     |         |         |

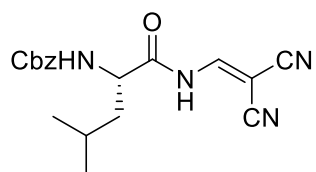

**S2**

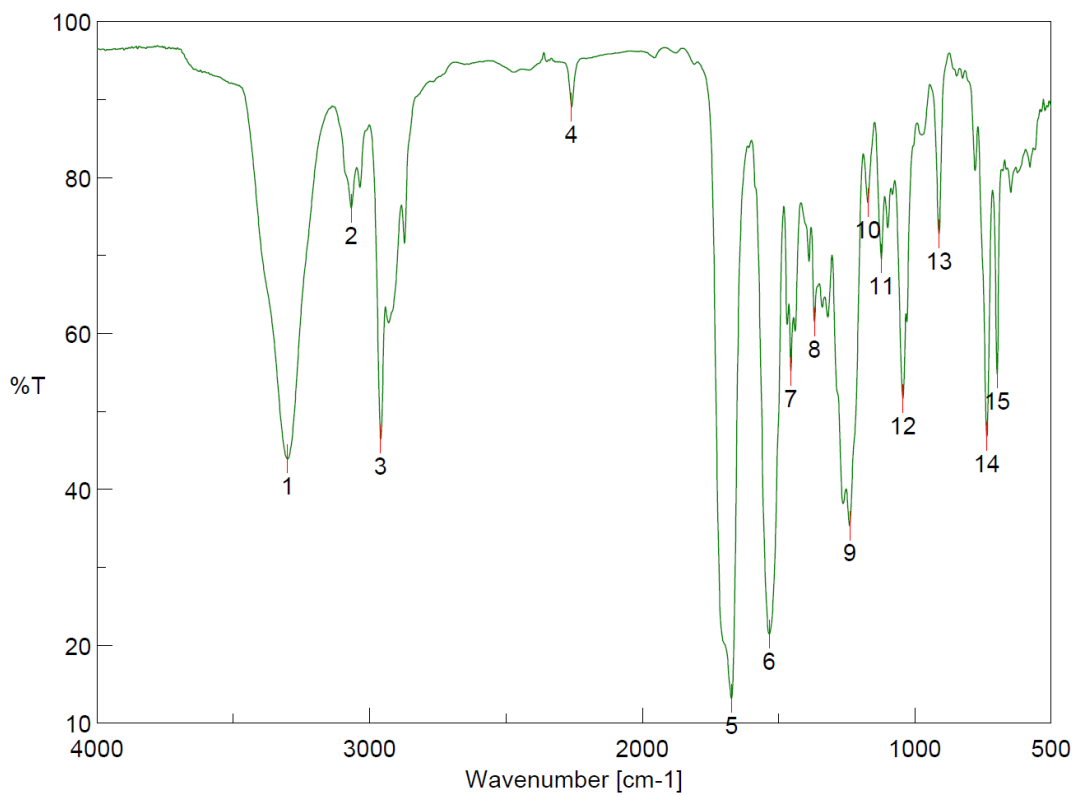

[ ピーク検出結果 ]

| No. | 位置      | 強度      | No. | 位置      | 強度      |
|-----|---------|---------|-----|---------|---------|
| 1   | 3300.57 | 43.8452 | 2   | 3067.23 | 76.0267 |
| 3   | 2959.23 | 46.4196 | 4   | 2259.2  | 89.0162 |
| 5   | 1671.98 | 13.1513 | 6   | 1534.1  | 21.4172 |
| 7   | 1455.03 | 55.0796 | 8   | 1368.25 | 61.4621 |
| 9   | 1239.04 | 35.2847 | 10  | 1172.51 | 76.7304 |
| 11  | 1122.37 | 69.5005 | 12  | 1043.3  | 51.5826 |
| 13  | 911.201 | 72.7499 | 14  | 735.71  | 46.7239 |
| 15  | 698.105 | 54.7491 |     |         |         |

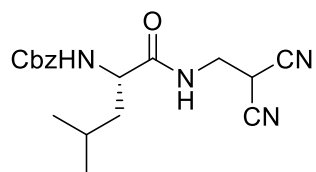

**1b**



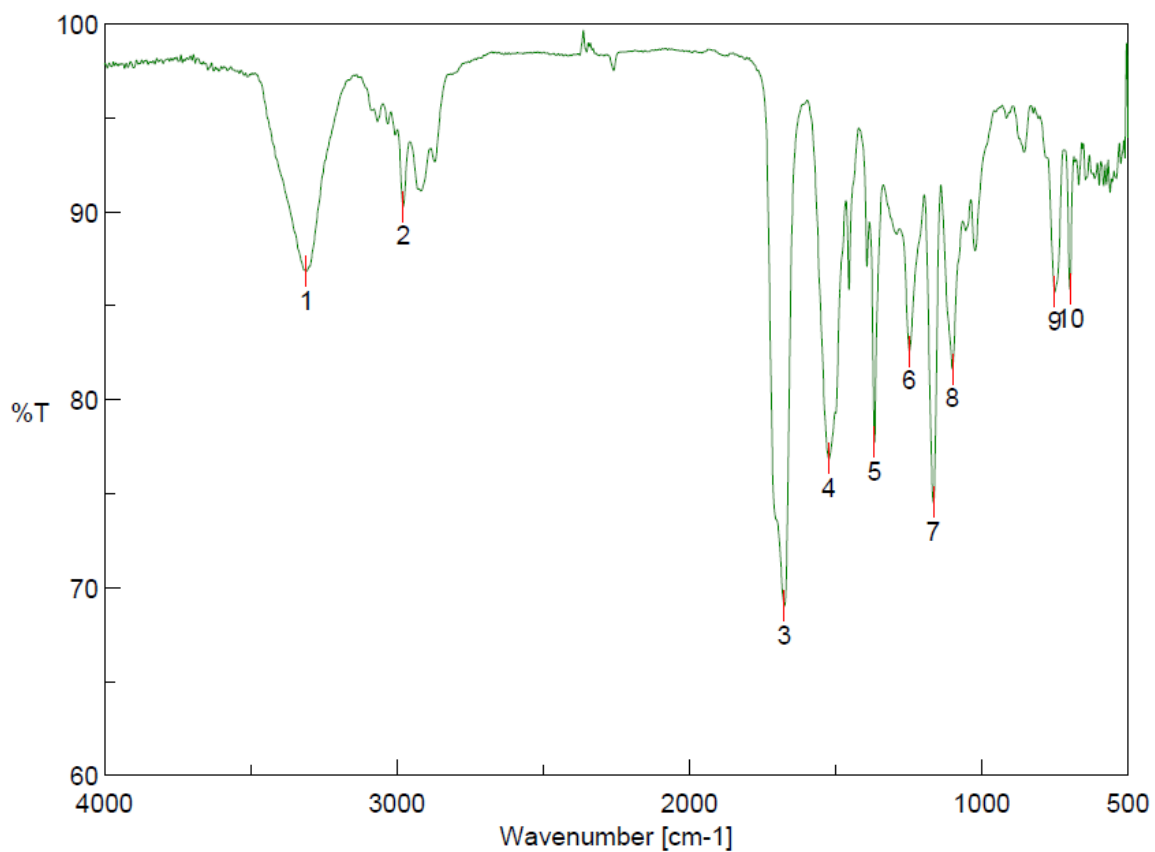

[ ピーク検出結果 ]

| No. | 位置      | 強度      | No. | 位置      | 強度      |
|-----|---------|---------|-----|---------|---------|
| 1   | 3310.21 | 86.7925 | 2   | 2978.52 | 90.2527 |
| 3   | 1674.87 | 69.0025 | 4   | 1522.52 | 76.841  |
| 5   | 1367.28 | 77.7134 | 6   | 1247.72 | 82.5589 |
| 7   | 1165.76 | 74.5069 | 8   | 1100.19 | 81.625  |
| 9   | 750.174 | 85.6964 | 10  | 698.105 | 85.8536 |

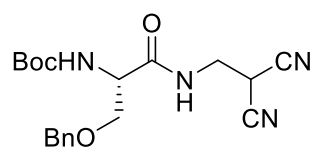

1c

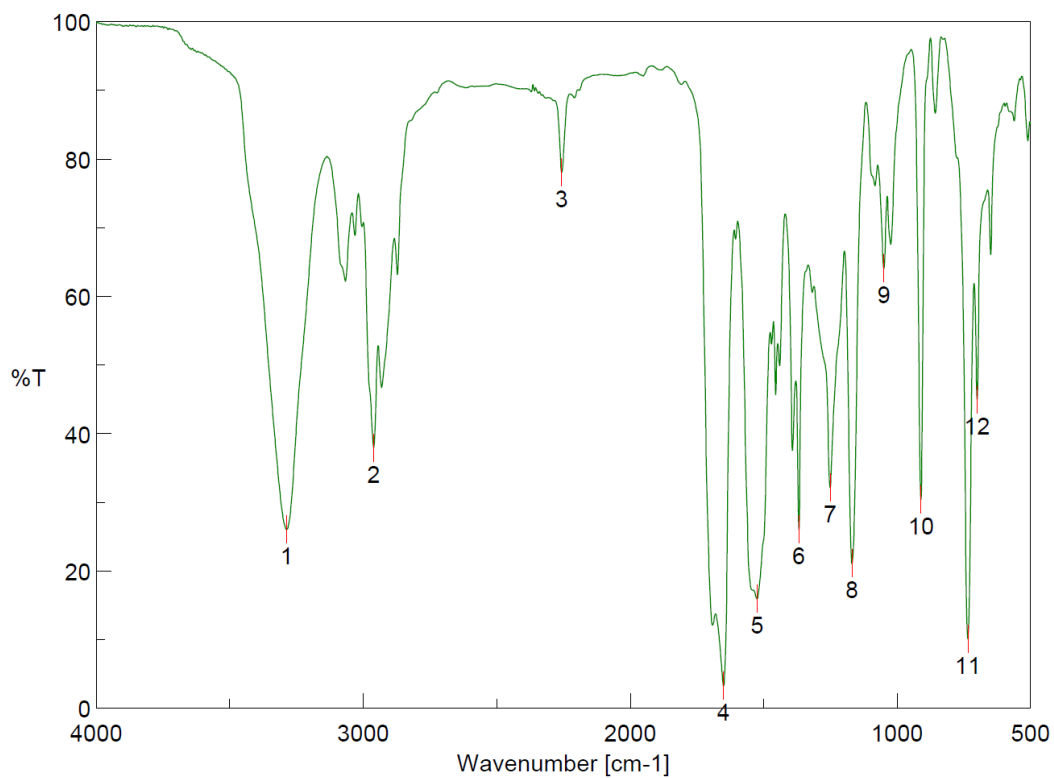

[ ピーク検出結果 ]

| No. | 位置      | 強度      | No. | 位置      | 強度      |
|-----|---------|---------|-----|---------|---------|
| 1   | 3287.07 | 26.0277 | 2   | 2961.16 | 37.9286 |
| 3   | 2256.31 | 78.0101 | 4   | 1649.8  | 3.2532  |
| 5   | 1524.45 | 15.903  | 6   | 1368.25 | 25.9993 |
| 7   | 1250.61 | 32.091  | 8   | 1168.65 | 21.0487 |
| 9   | 1049.09 | 64.0349 | 10  | 910.236 | 30.4007 |
| 11  | 734.746 | 10.0449 | 12  | 700.034 | 44.9413 |

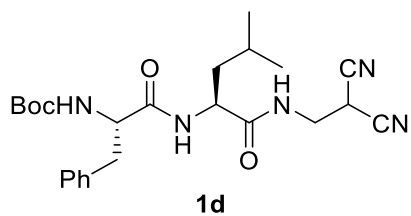

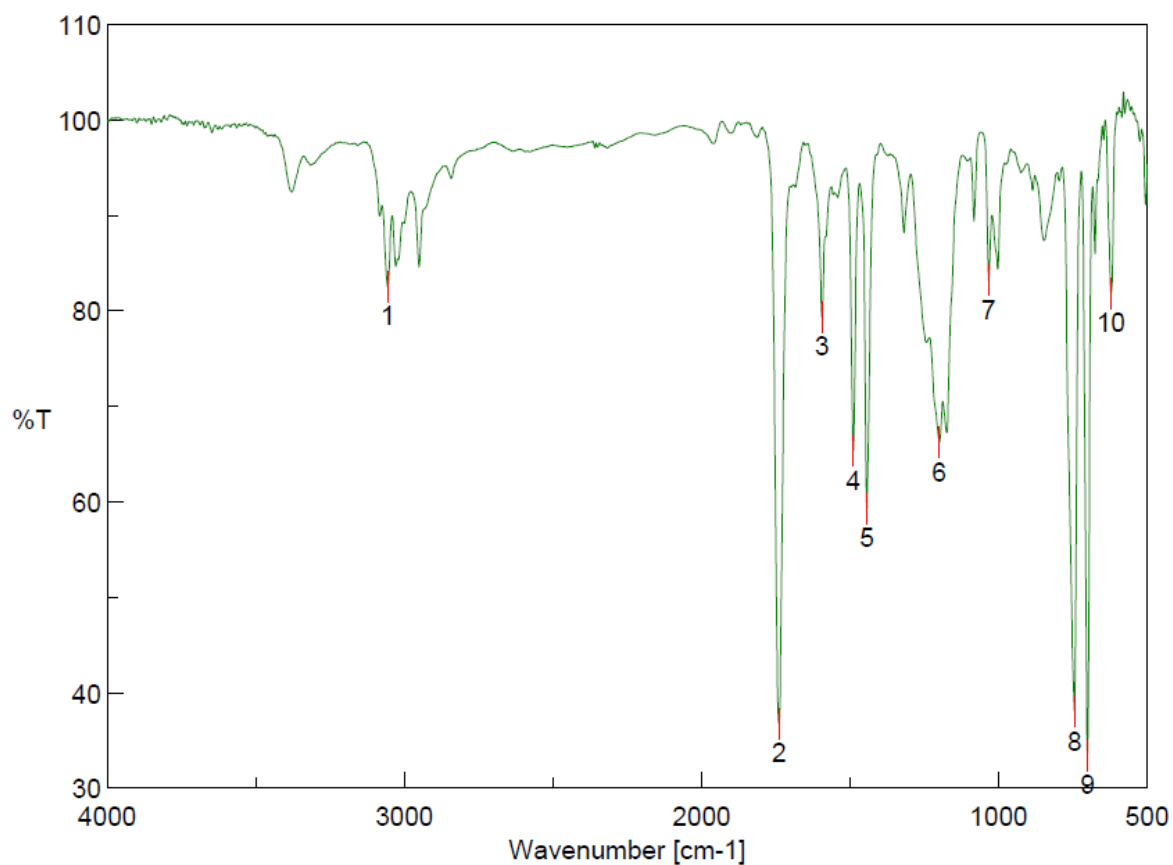

[ ピーク検出結果 ]

| No. | 位置      | 強度      | No. | 位置      | 強度      |
|-----|---------|---------|-----|---------|---------|
| 1   | 3056.62 | 82.5047 | 2   | 1739.48 | 36.7543 |
| 3   | 1594.84 | 79.2915 | 4   | 1488.78 | 65.3172 |
| 5   | 1443.46 | 59.2991 | 6   | 1199.51 | 66.2018 |
| 7   | 1033.66 | 83.1977 | 8   | 744.388 | 38.0137 |
| 9   | 700.998 | 33.4192 | 10  | 621.931 | 81.7548 |

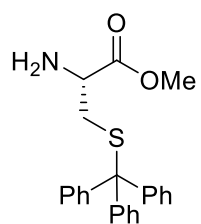

s5

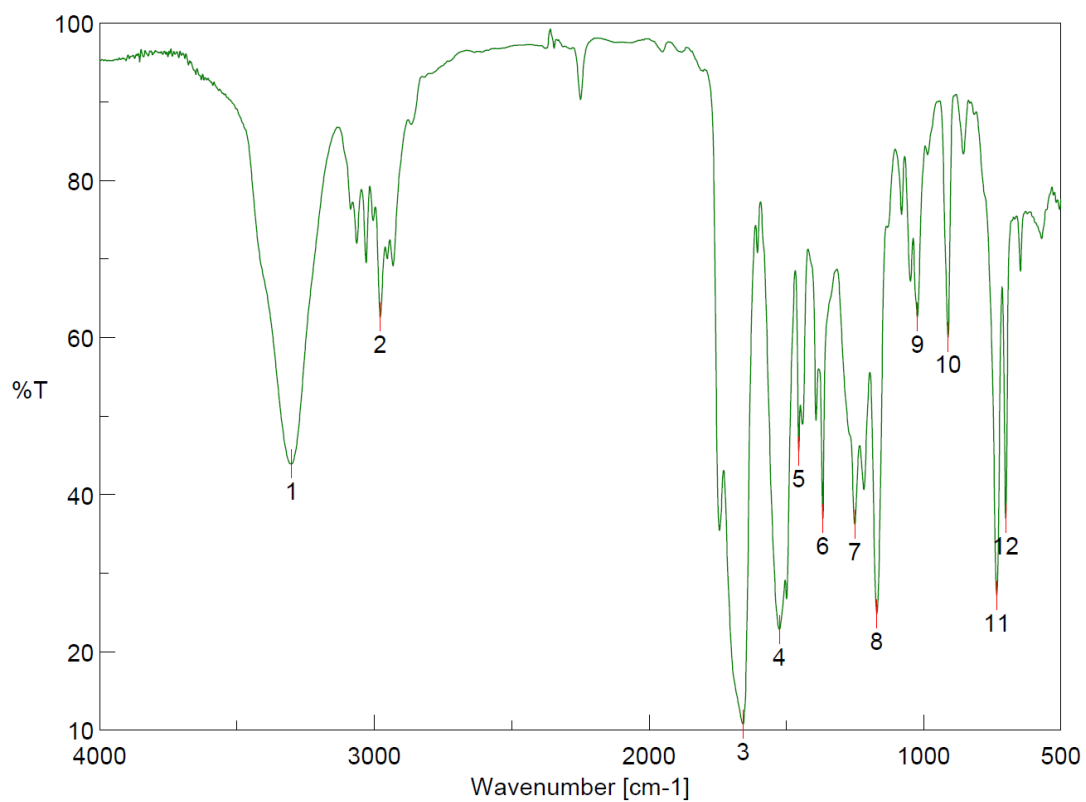

[ ピーク検出結果 ]

| No. | 位置      | 強度      |
|-----|---------|---------|
| 1   | 3301.54 | 43.8714 |
| 3   | 1656.55 | 10.7298 |
| 5   | 1455.03 | 45.4611 |
| 7   | 1250.61 | 36.1734 |
| 9   | 1022.09 | 62.5819 |
| 11  | 733.782 | 27.123  |

| No. | 位置      | 強度      |
|-----|---------|---------|
| 2   | 2978.52 | 62.5503 |
| 4   | 1525.42 | 22.8094 |
| 6   | 1367.28 | 36.9288 |
| 8   | 1170.58 | 24.7846 |
| 10  | 911.201 | 59.9884 |
| 12  | 700.998 | 36.9299 |

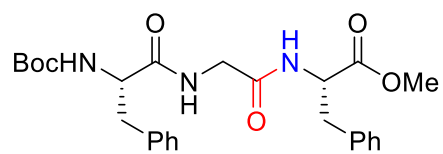

**Boc-Phe-Gly-Phe-OMe (3a)**

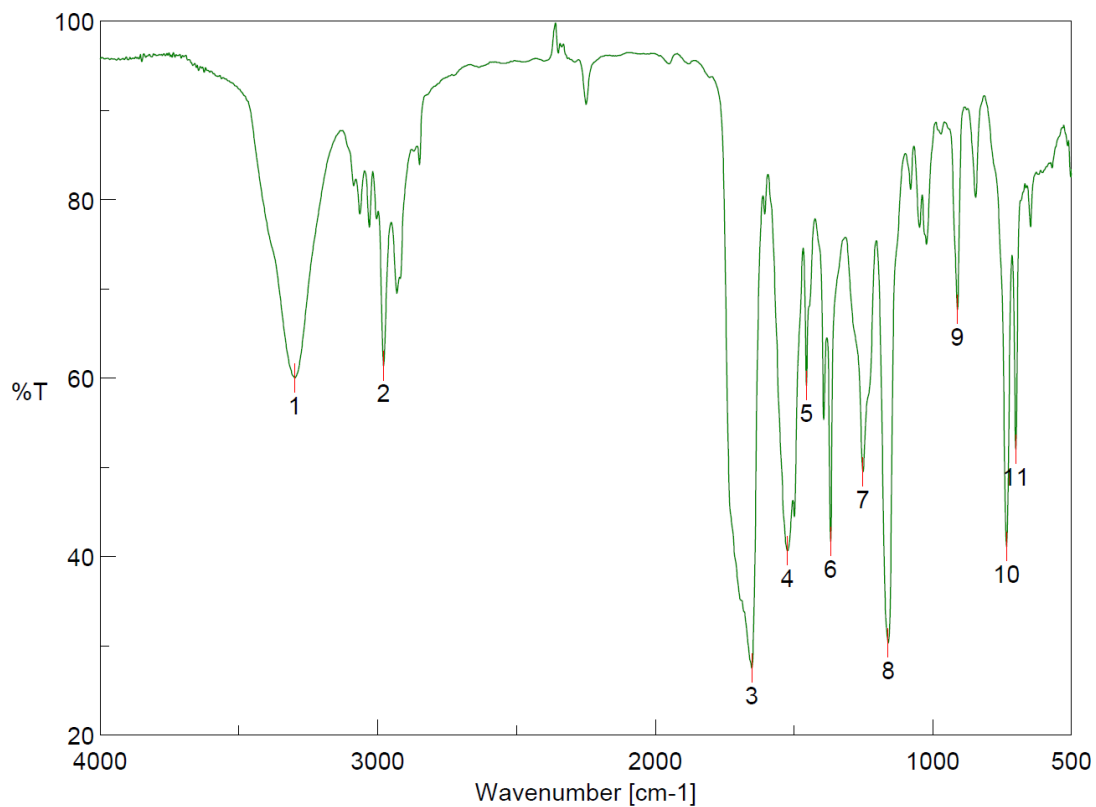

[ ピーク検出結果 ]

| No. | 位置      | 強度      | No. | 位置      | 強度      |
|-----|---------|---------|-----|---------|---------|
| 1   | 3298.64 | 60.0093 | 2   | 2978.52 | 61.3614 |
| 3   | 1651.73 | 27.4668 | 4   | 1523.49 | 40.6265 |
| 5   | 1455.03 | 59.1203 | 6   | 1368.25 | 41.7211 |
| 7   | 1251.58 | 49.5033 | 8   | 1159.97 | 30.2829 |
| 9   | 911.201 | 67.674  | 10  | 733.782 | 41.0872 |
| 11  | 700.034 | 51.9936 |     |         |         |

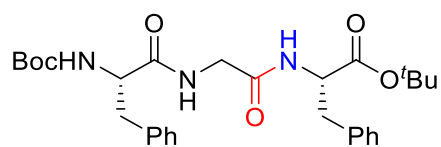

**Boc-Phe-Gly-Phe-O $t$ -Bu (3b)**

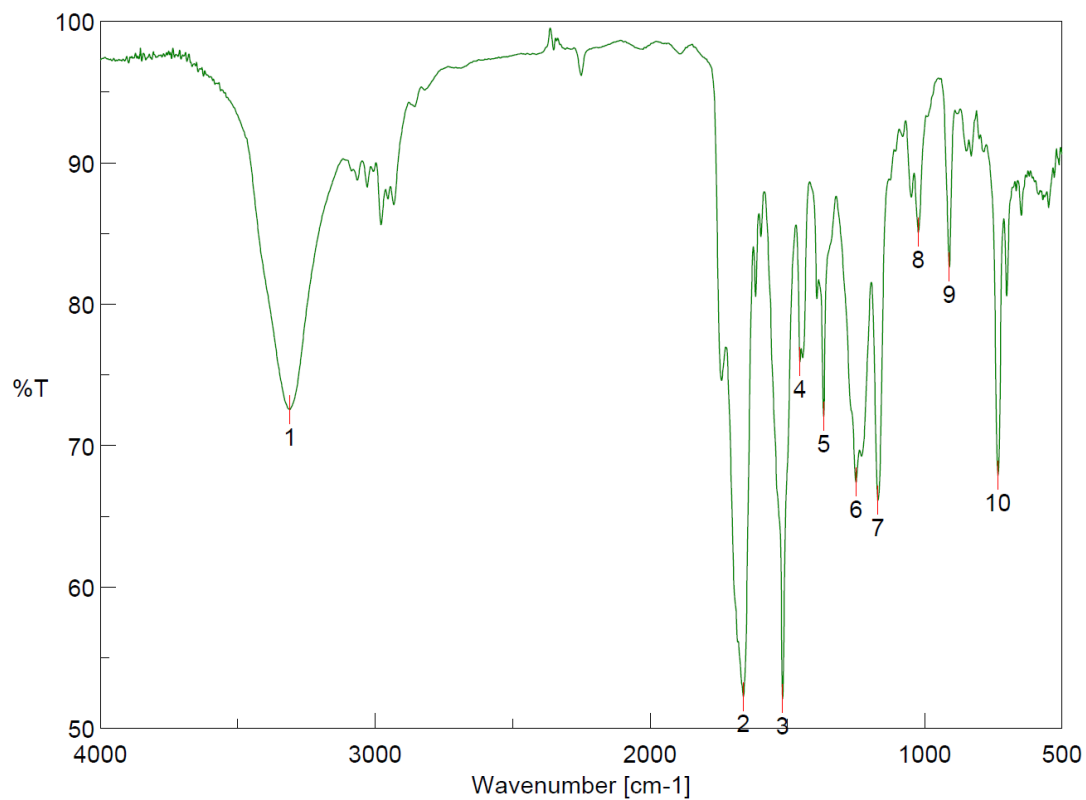

[ ピーク検出結果 ]

| No. | 位置      | 強度      | No. | 位置      | 強度      |
|-----|---------|---------|-----|---------|---------|
| 1   | 3311.18 | 72.5242 | 2   | 1660.41 | 52.2481 |
| 3   | 1516.74 | 52.0785 | 4   | 1454.06 | 75.9124 |
| 5   | 1367.28 | 72.0527 | 6   | 1249.65 | 67.3978 |
| 7   | 1169.62 | 66.1049 | 8   | 1023.05 | 85.067  |
| 9   | 910.236 | 82.6095 | 10  | 732.817 | 67.8636 |

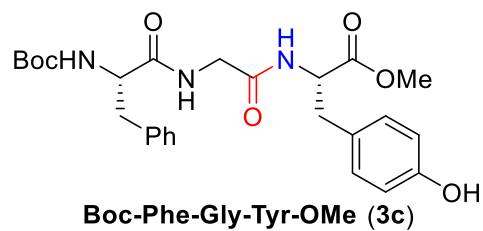

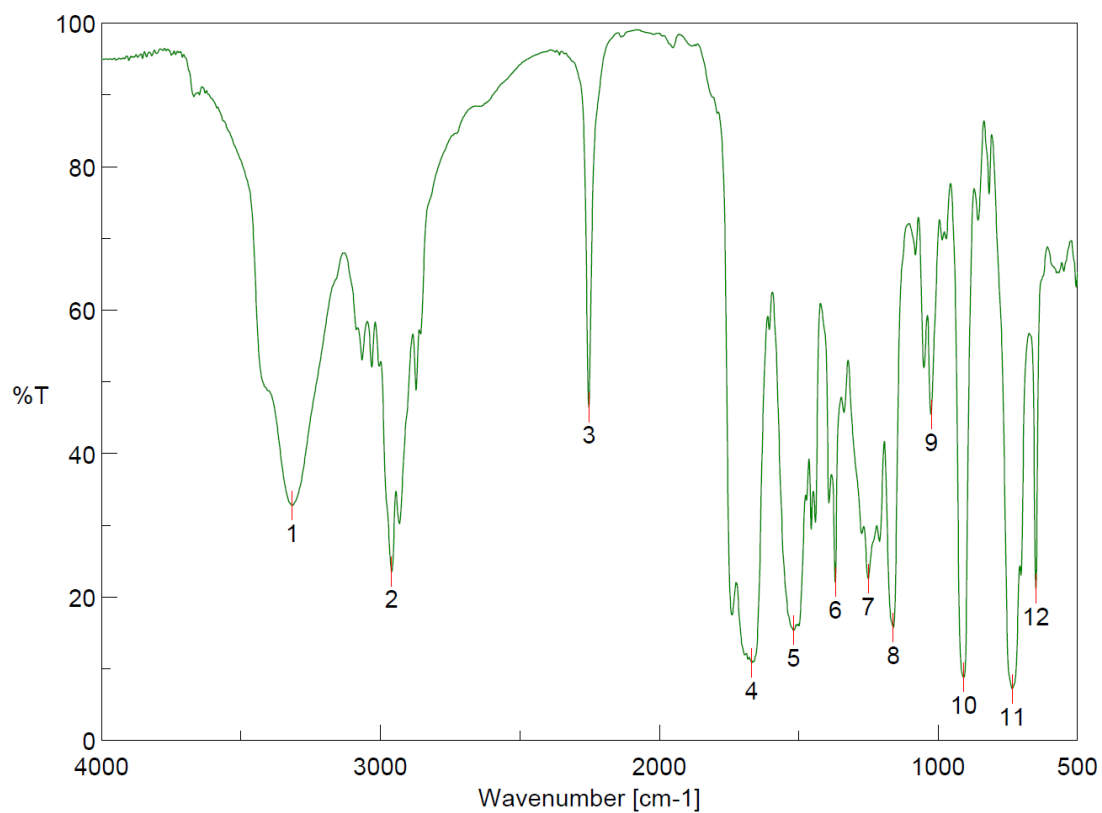

[ ピーク検出結果 ]

| No. | 位置      | 強度      | No. | 位置      | 強度      |
|-----|---------|---------|-----|---------|---------|
| 1   | 3316    | 32.7416 | 2   | 2959.23 | 23.5087 |
| 3   | 2252.45 | 46.4209 | 4   | 1668.12 | 10.8064 |
| 5   | 1517.7  | 15.3303 | 6   | 1368.25 | 22.0287 |
| 7   | 1250.61 | 22.5466 | 8   | 1159.97 | 15.7076 |
| 9   | 1024.98 | 45.4259 | 10  | 907.344 | 8.72998 |
| 11  | 733.782 | 7.17211 | 12  | 648.929 | 21.1374 |

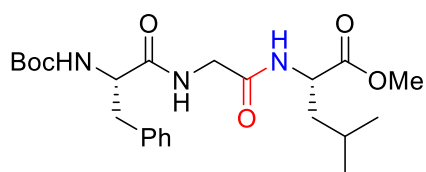

**Boc-Phe-Gly-Leu-OMe (3d)**

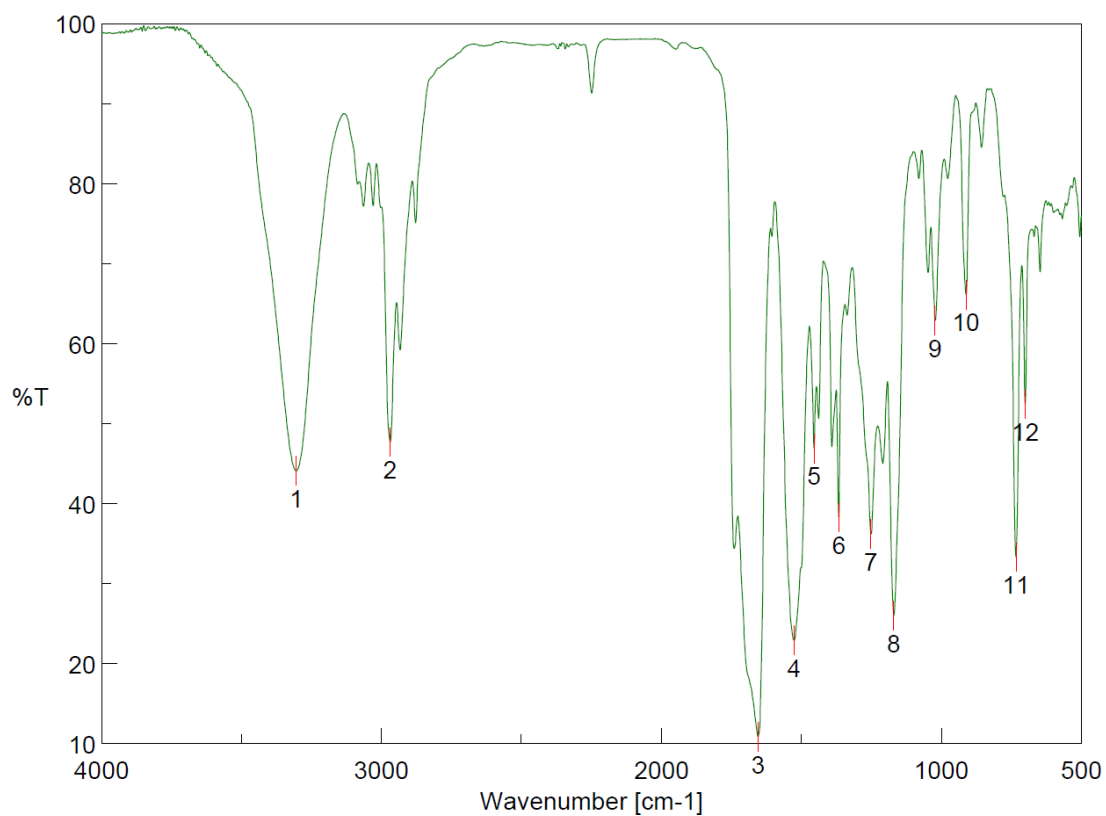

[ ピーク検出結果 ]

| No. | 位置      | 強度      | No. | 位置      | 強度      |
|-----|---------|---------|-----|---------|---------|
| 1   | 3304.43 | 44.096  | 2   | 2968.87 | 47.6925 |
| 3   | 1654.62 | 10.8463 | 4   | 1526.38 | 22.9138 |
| 5   | 1455.03 | 46.8776 | 6   | 1366.32 | 38.3292 |
| 7   | 1251.58 | 36.1985 | 8   | 1169.62 | 26.0006 |
| 9   | 1022.09 | 62.8908 | 10  | 912.165 | 66.1071 |
| 11  | 733.782 | 33.304  | 12  | 700.034 | 52.4097 |

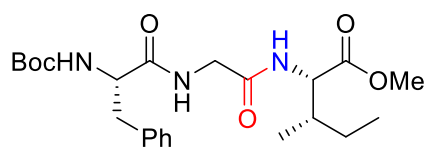

**Boc-Phe-Gly-Ile-OMe (3e)**

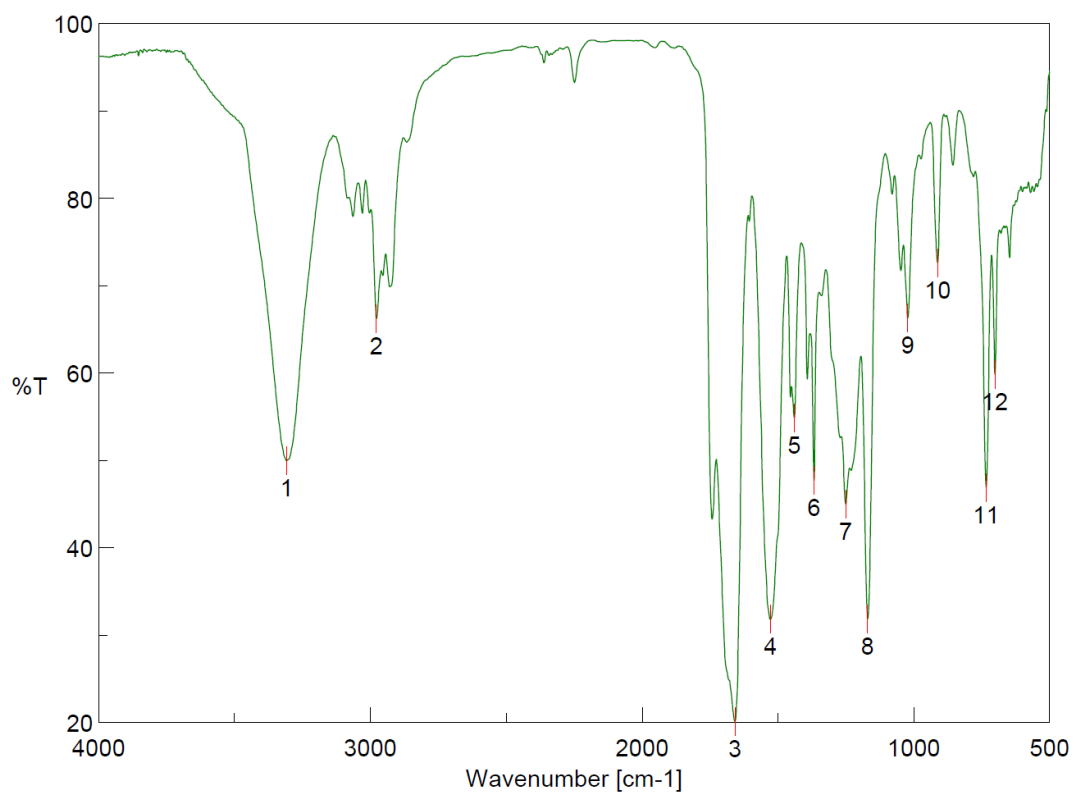

[ ピーク検出結果 ]

| No. | 位置      | 強度      | No. | 位置      | 強度      |
|-----|---------|---------|-----|---------|---------|
| 1   | 3308.29 | 49.9198 | 2   | 2977.55 | 66.1941 |
| 3   | 1658.48 | 20.1148 | 4   | 1527.35 | 31.7812 |
| 5   | 1439.6  | 54.863  | 6   | 1367.28 | 47.6799 |
| 7   | 1250.61 | 44.9626 | 8   | 1169.62 | 31.8551 |
| 9   | 1022.09 | 66.2899 | 10  | 912.165 | 72.6073 |
| 11  | 732.817 | 46.8598 | 12  | 700.998 | 59.8015 |

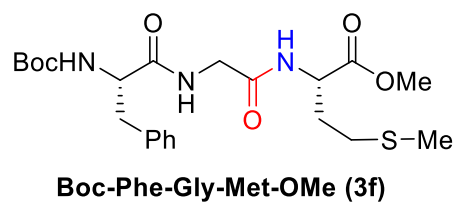

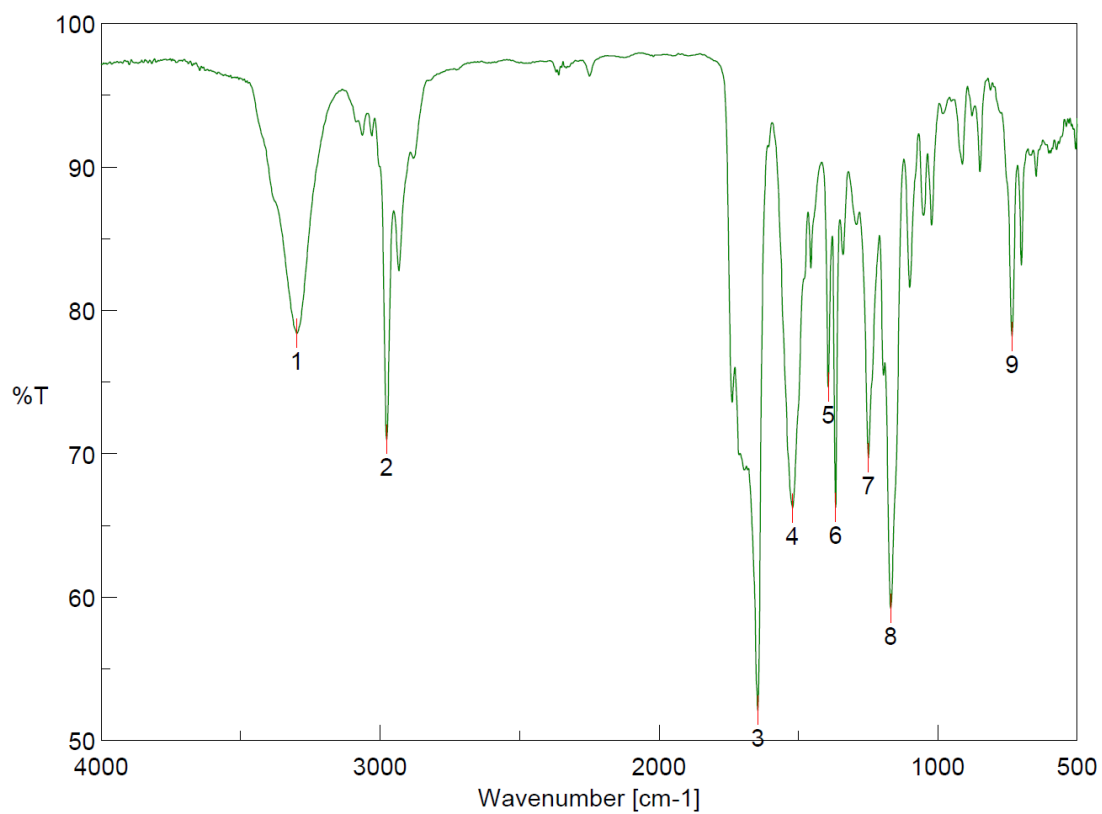

[ ピーク検出結果 ]

| No. | 位置      | 強度      | No. | 位置      | 強度      |
|-----|---------|---------|-----|---------|---------|
| 1   | 3298.64 | 78.3825 | 2   | 2976.59 | 70.9697 |
| 3   | 1644.98 | 52.0729 | 4   | 1520.6  | 66.2115 |
| 5   | 1392.35 | 74.6342 | 6   | 1366.32 | 66.2503 |
| 7   | 1248.68 | 69.7086 | 8   | 1168.65 | 59.2233 |
| 9   | 733.782 | 78.1645 |     |         |         |

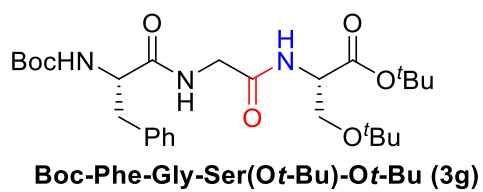

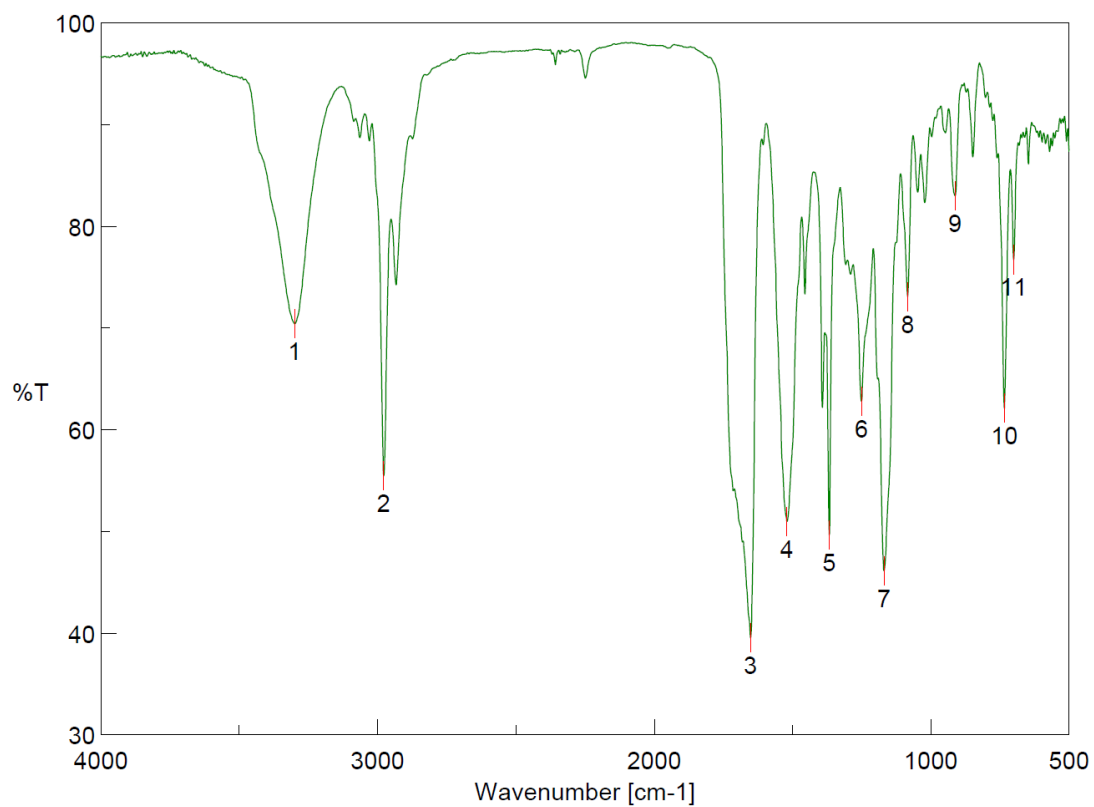

[ ピーク検出結果 ]

| No. | 位置      | 強度      | No. | 位置      | 強度      |
|-----|---------|---------|-----|---------|---------|
| 1   | 3299.61 | 70.391  | 2   | 2977.55 | 55.4201 |
| 3   | 1651.73 | 39.4972 | 4   | 1519.63 | 50.9488 |
| 5   | 1367.28 | 49.6368 | 6   | 1250.61 | 62.7666 |
| 7   | 1168.65 | 46.111  | 8   | 1083.8  | 73.0417 |
| 9   | 912.165 | 82.9818 | 10  | 733.782 | 62.0768 |
| 11  | 700.034 | 76.708  |     |         |         |

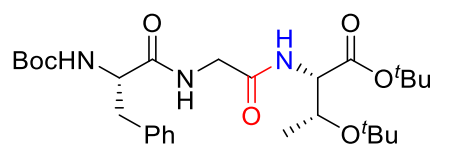

**Boc-Phe-Gly-Thr(Ot-Bu)-Ot-Bu (3h)**

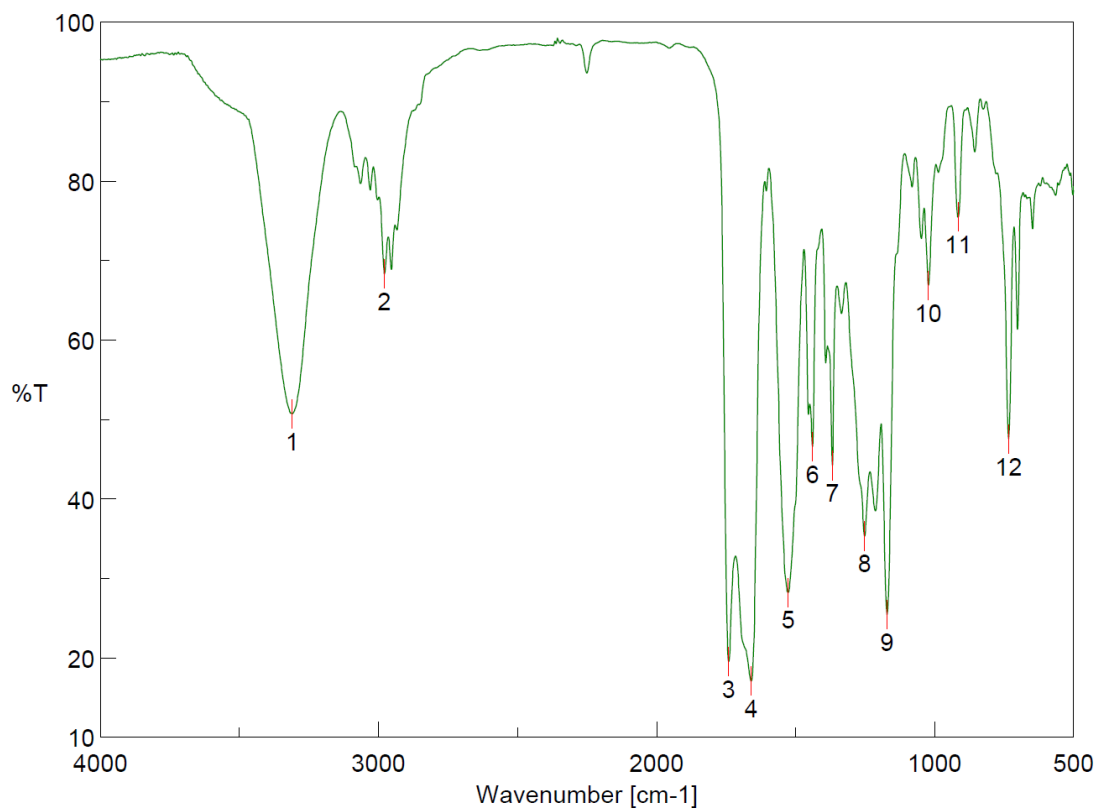

[ ピーク検出結果 ]

| No. | 位置      | 強度      | No. | 位置      | 強度      |
|-----|---------|---------|-----|---------|---------|
| 1   | 3310.21 | 50.6815 | 2   | 2978.52 | 68.2958 |
| 3   | 1740.44 | 19.4793 | 4   | 1659.45 | 17.035  |
| 5   | 1526.38 | 28.1887 | 6   | 1438.64 | 46.5453 |
| 7   | 1367.28 | 44.1716 | 8   | 1251.58 | 35.2838 |
| 9   | 1170.58 | 25.4031 | 10  | 1022.09 | 66.8709 |
| 11  | 915.058 | 75.4201 | 12  | 733.782 | 47.5129 |

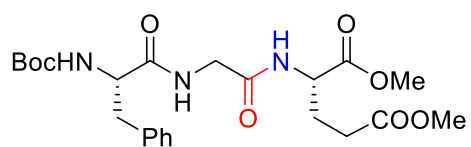

**Boc-Phe-Gly-Glu(OMe)-OMe (3i)**

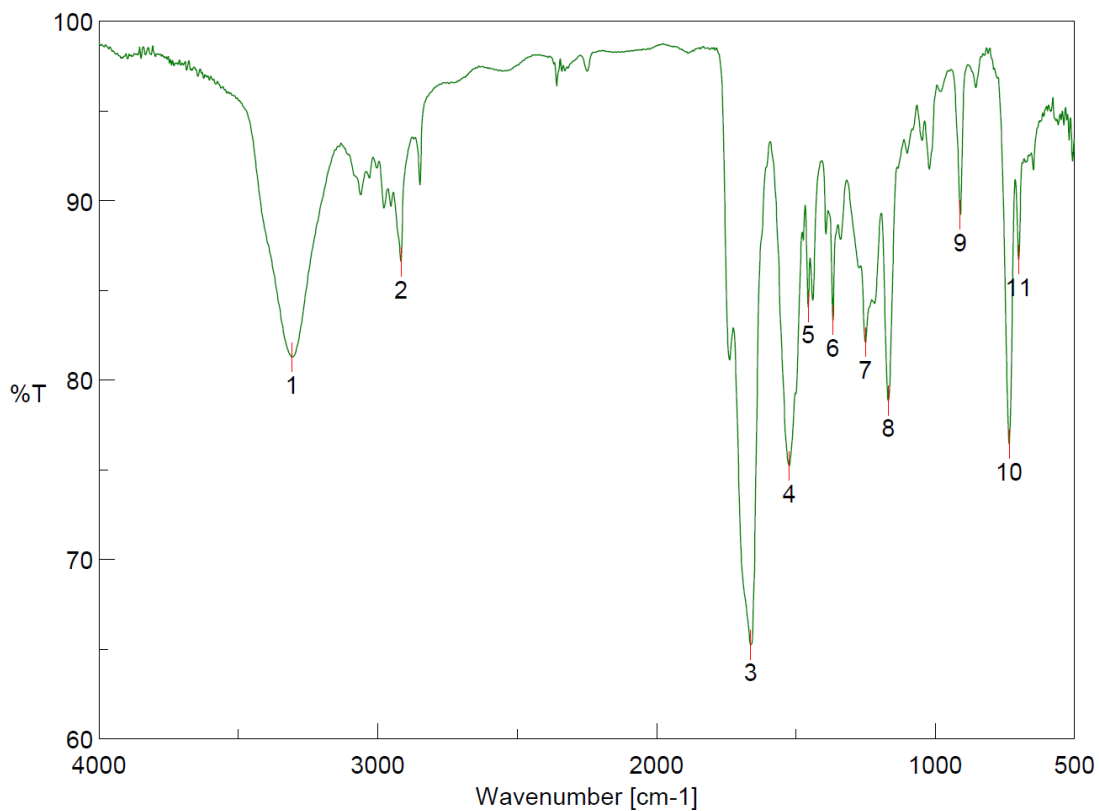

[ ピーク検出結果 ]

| No. | 位置      | 強度      | No. | 位置      | 強度      |
|-----|---------|---------|-----|---------|---------|
| 1   | 3308.29 | 81.275  | 2   | 2916.81 | 86.59   |
| 3   | 1662.34 | 65.2255 | 4   | 1523.49 | 75.2082 |
| 5   | 1455.99 | 84.0545 | 6   | 1367.28 | 83.3322 |
| 7   | 1250.61 | 82.0954 | 8   | 1167.69 | 78.8467 |
| 9   | 910.236 | 89.2091 | 10  | 734.746 | 76.4169 |
| 11  | 700.034 | 86.6986 |     |         |         |

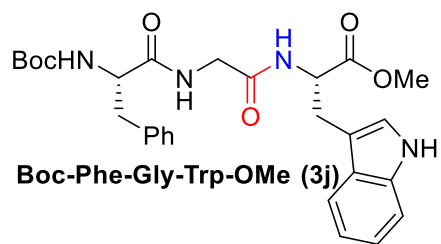

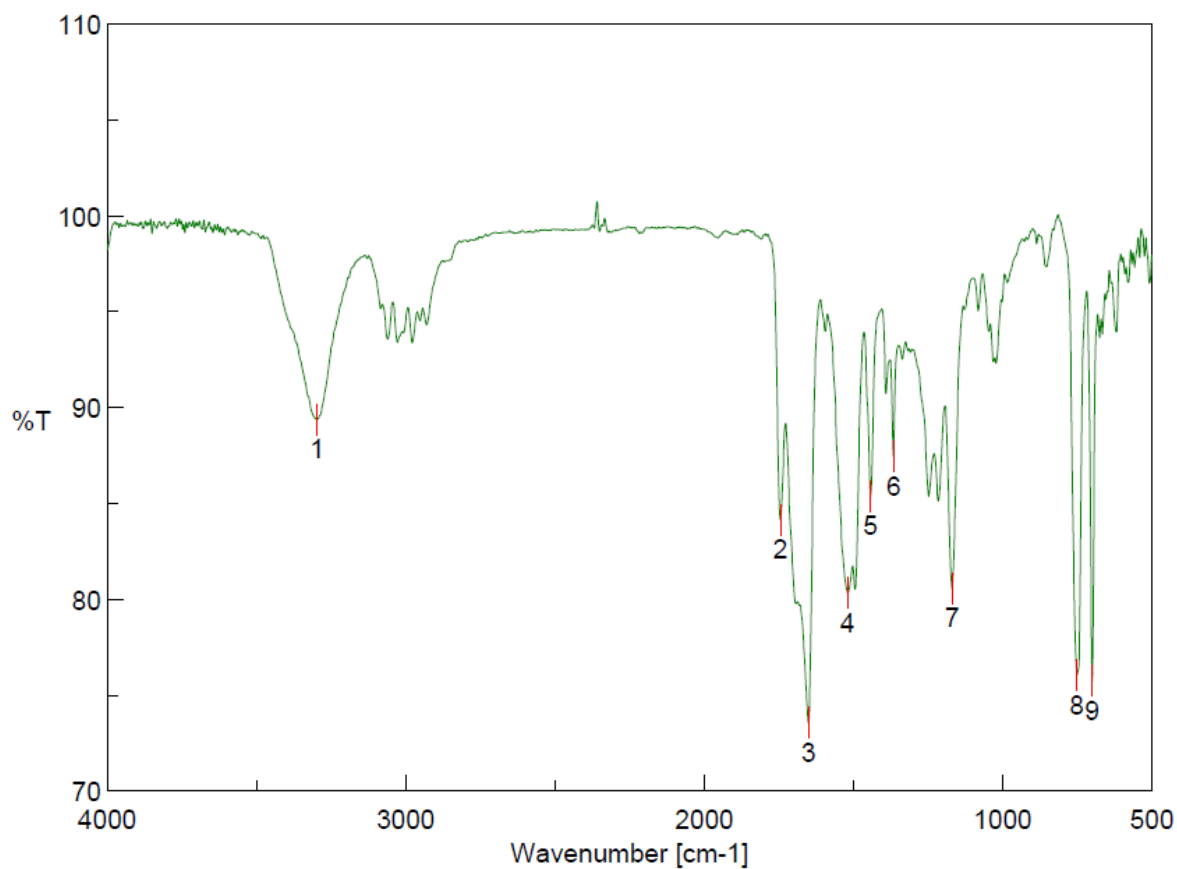

[ ピーク検出結果 ]

| No. | 位置      | 強度      | No. | 位置      | 強度      |
|-----|---------|---------|-----|---------|---------|
| 1   | 3297.68 | 89.366  | 2   | 1745.26 | 84.1273 |
| 3   | 1650.77 | 73.5398 | 4   | 1518.67 | 80.331  |
| 5   | 1442.49 | 85.3644 | 6   | 1366.32 | 87.4338 |
| 7   | 1169.62 | 80.5739 | 8   | 751.138 | 76.033  |
| 9   | 700.034 | 75.7426 |     |         |         |

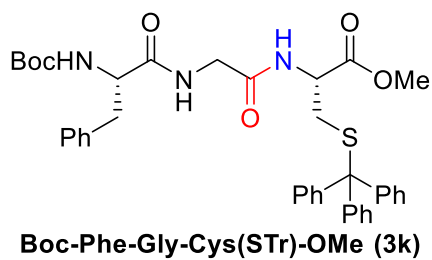

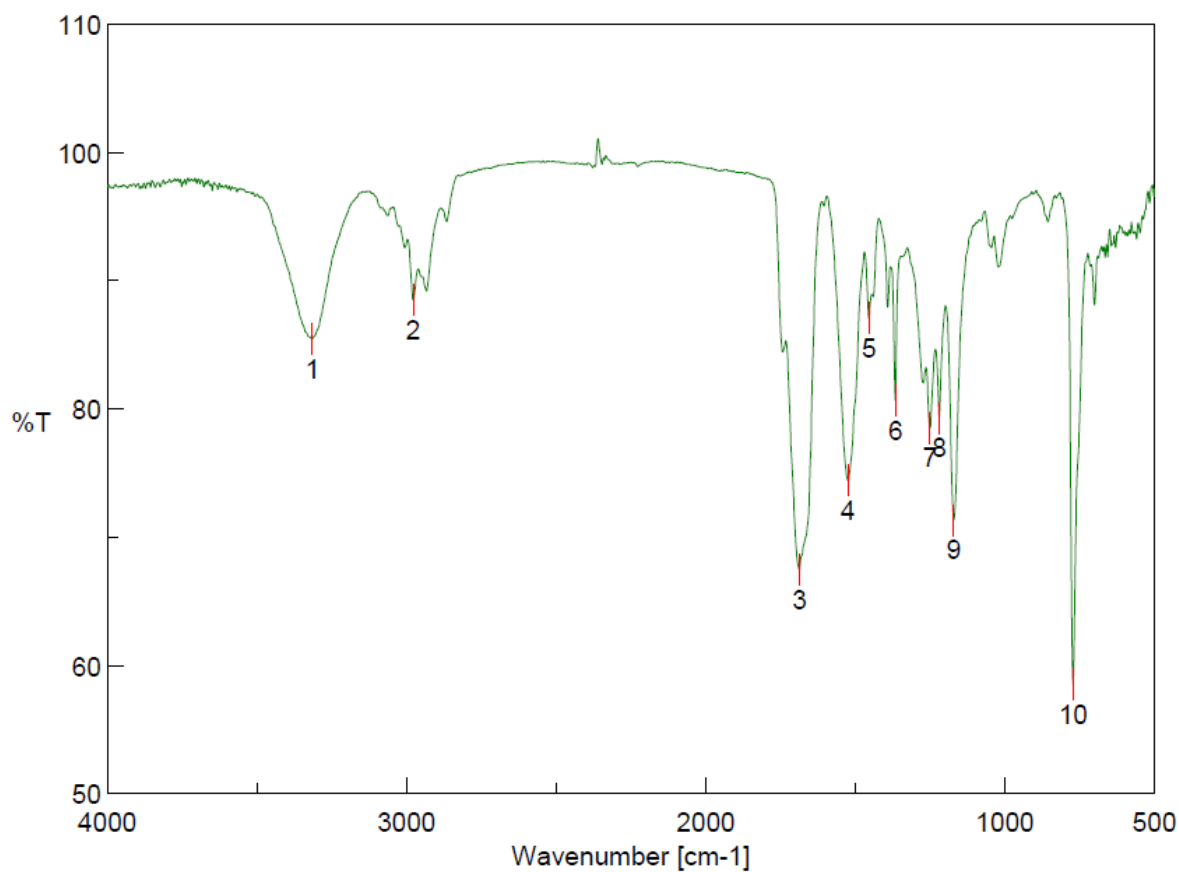

[ ピーク検出結果 ]

| No. | 位置      | 強度      | No. | 位置      | 強度      |
|-----|---------|---------|-----|---------|---------|
| 1   | 3315.03 | 85.4422 | 2   | 2977.55 | 88.4715 |
| 3   | 1687.41 | 67.4625 | 4   | 1524.45 | 74.3915 |
| 5   | 1455.03 | 87.0301 | 6   | 1366.32 | 80.6165 |
| 7   | 1250.61 | 78.4828 | 8   | 1219.76 | 79.2566 |
| 9   | 1170.58 | 71.3235 | 10  | 772.351 | 58.5079 |

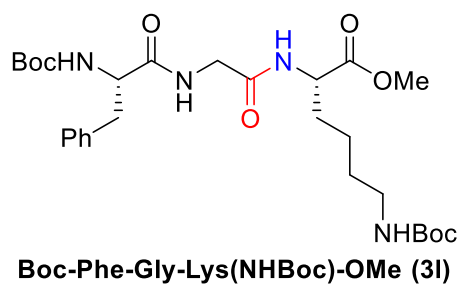

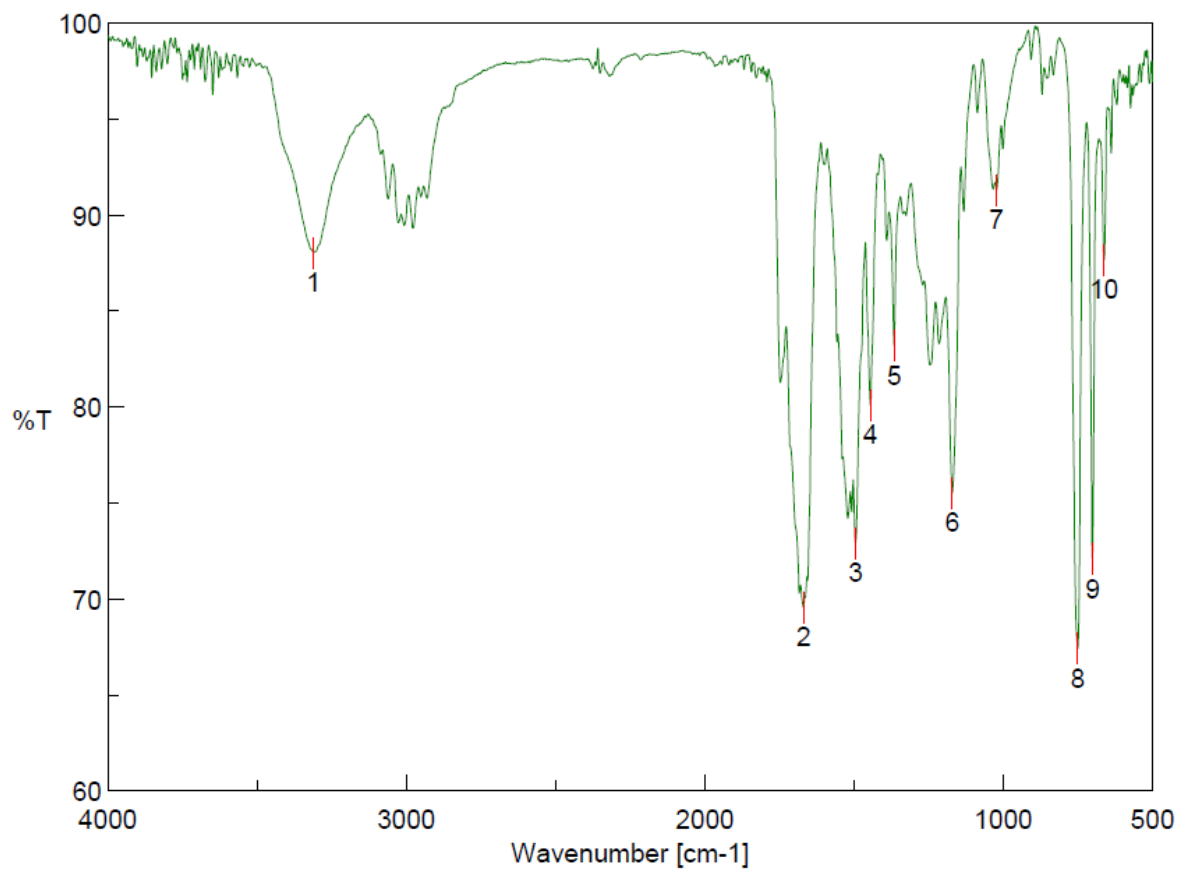

[ ピーク検出結果 ]

| No. | 位置      | 強度      | No. | 位置      | 強度      |
|-----|---------|---------|-----|---------|---------|
| 1   | 3312.14 | 88.0061 | 2   | 1670.05 | 69.561  |
| 3   | 1495.53 | 72.8783 | 4   | 1445.39 | 80.0703 |
| 5   | 1366.32 | 83.1778 | 6   | 1170.58 | 75.5172 |
| 7   | 1022.09 | 91.2757 | 8   | 750.174 | 67.4112 |
| 9   | 700.998 | 72.0437 | 10  | 662.428 | 87.6546 |

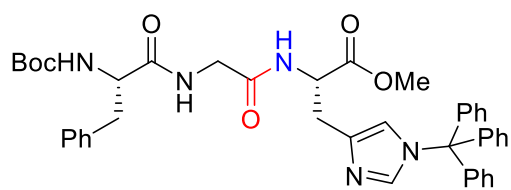

**Boc-Phe-Gly-His(NTr)-OMe (3m)**

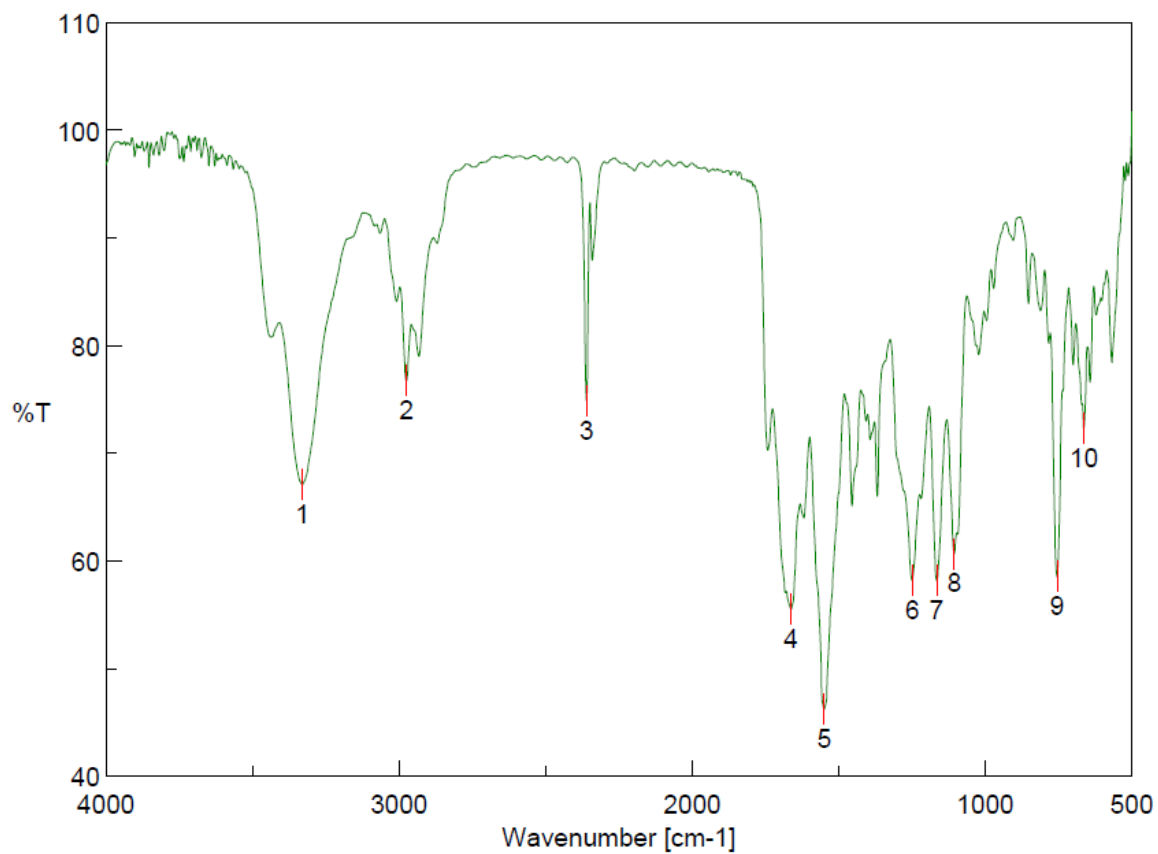

[ ピーク検出結果 ]

| No. | 位置      | 強度      | No. | 位置      | 強度      |
|-----|---------|---------|-----|---------|---------|
| 1   | 3330.46 | 67.0803 | 2   | 2975.62 | 76.6946 |
| 3   | 2360.44 | 74.8292 | 4   | 1662.34 | 55.4888 |
| 5   | 1550.49 | 46.2182 | 6   | 1249.65 | 58.1851 |
| 7   | 1165.76 | 58.1771 | 8   | 1105.98 | 60.6509 |
| 9   | 754.995 | 58.5308 | 10  | 663.393 | 72.2808 |

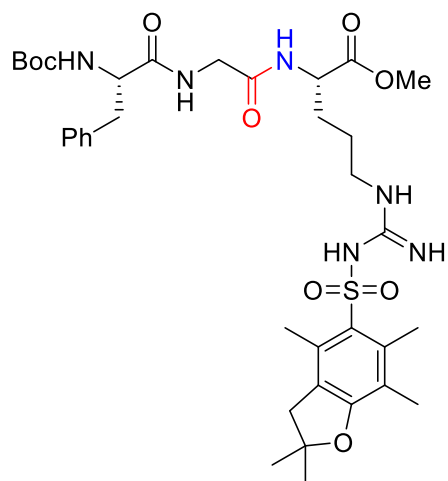

**Boc-Phe-Gly-Arg(Pbf)-OMe (3n)**

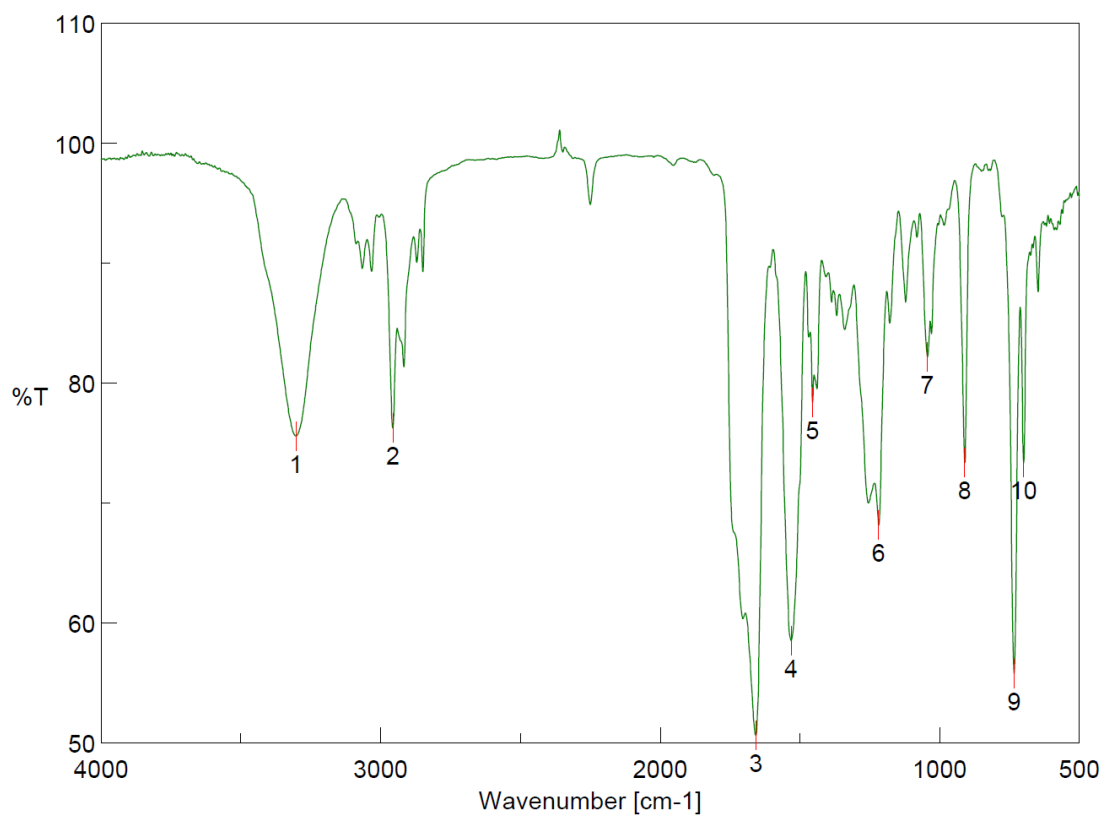

[ ピーク検出結果 ]

| No. | 位置      | 強度      | No. | 位置      | 強度      |
|-----|---------|---------|-----|---------|---------|
| 1   | 3303.46 | 75.58   | 2   | 2956.34 | 76.2501 |
| 3   | 1657.52 | 50.6284 | 4   | 1531.2  | 58.5182 |
| 5   | 1455.03 | 78.3637 | 6   | 1217.83 | 68.1593 |
| 7   | 1043.3  | 82.1589 | 8   | 910.236 | 73.3698 |
| 9   | 732.817 | 55.7579 | 10  | 699.069 | 73.3381 |

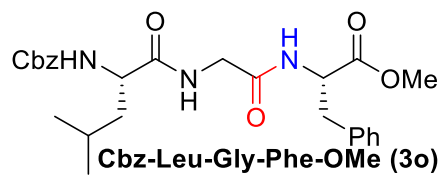

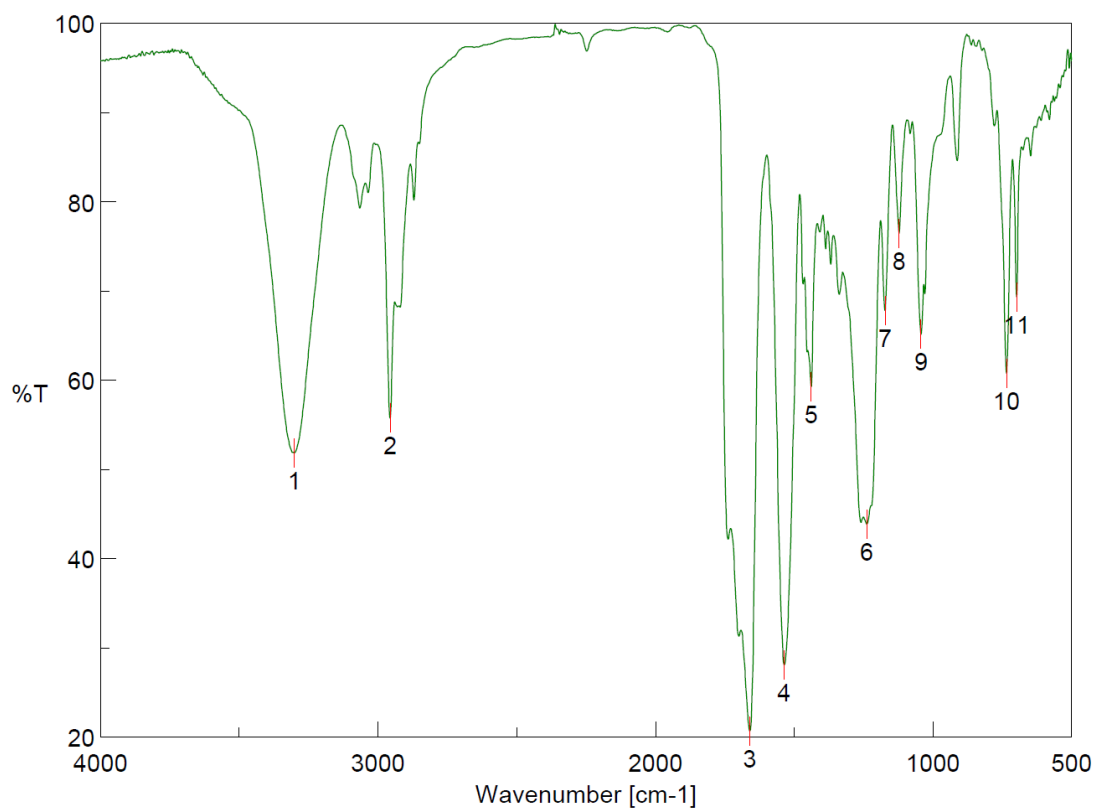

[ ピーク検出結果 ]

| No. | 位置      | 強度      |
|-----|---------|---------|
| 1   | 3301.54 | 51.839  |
| 3   | 1660.41 | 20.6665 |
| 5   | 1438.64 | 59.25   |
| 7   | 1172.51 | 67.7781 |
| 9   | 1042.34 | 65.1036 |
| 11  | 698.105 | 69.3008 |

| No. | 位置      | 強度      |
|-----|---------|---------|
| 2   | 2956.34 | 55.7298 |
| 4   | 1536.02 | 28.0911 |
| 6   | 1238.08 | 43.841  |
| 8   | 1121.4  | 76.4294 |
| 10  | 734.746 | 60.7577 |

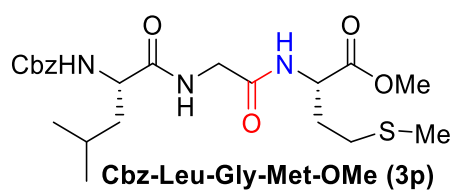

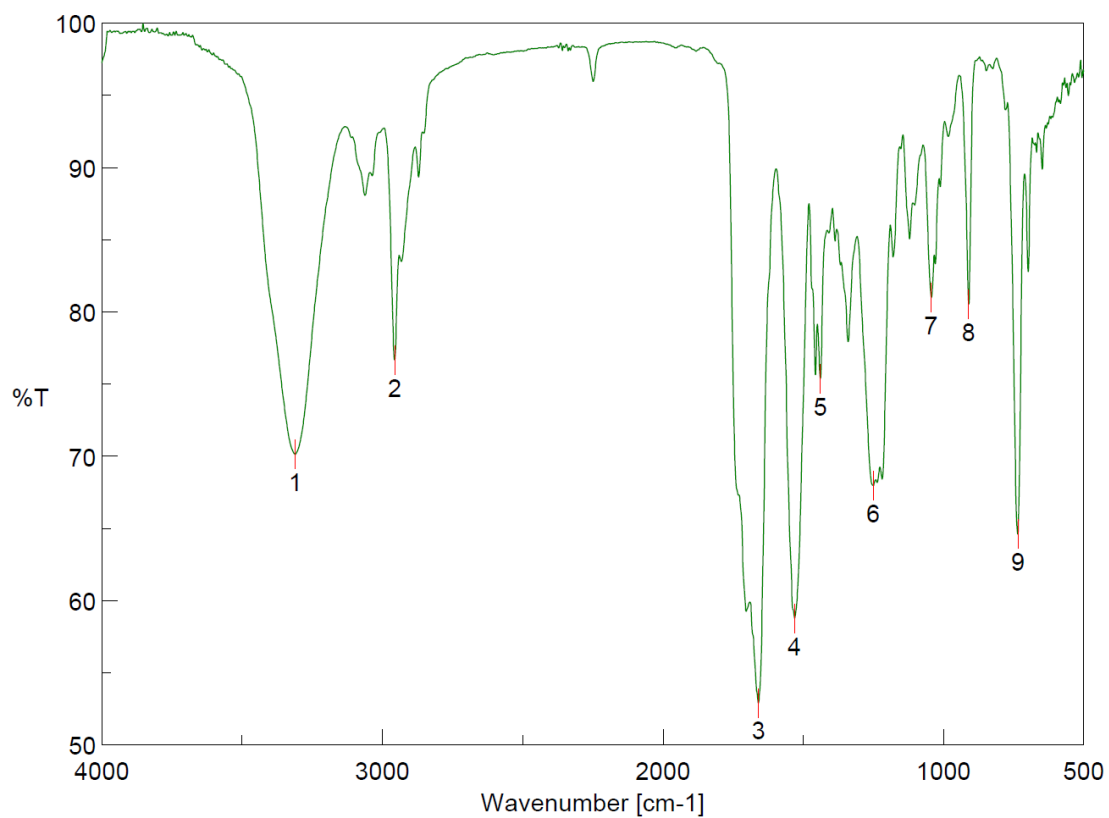

[ ピーク検出結果 ]

| No. | 位置      | 強度      | No. | 位置      | 強度      |
|-----|---------|---------|-----|---------|---------|
| 1   | 3311.18 | 70.1075 | 2   | 2956.34 | 76.6451 |
| 3   | 1659.45 | 52.9004 | 4   | 1530.24 | 58.7539 |
| 5   | 1438.64 | 75.3581 | 6   | 1250.61 | 67.9598 |
| 7   | 1043.3  | 80.9608 | 8   | 910.236 | 80.5249 |
| 9   | 734.746 | 64.5908 |     |         |         |

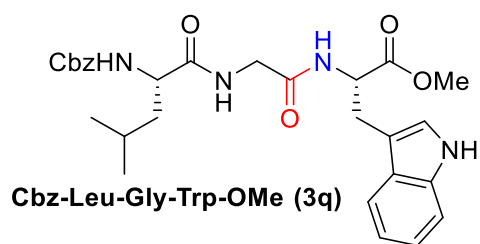

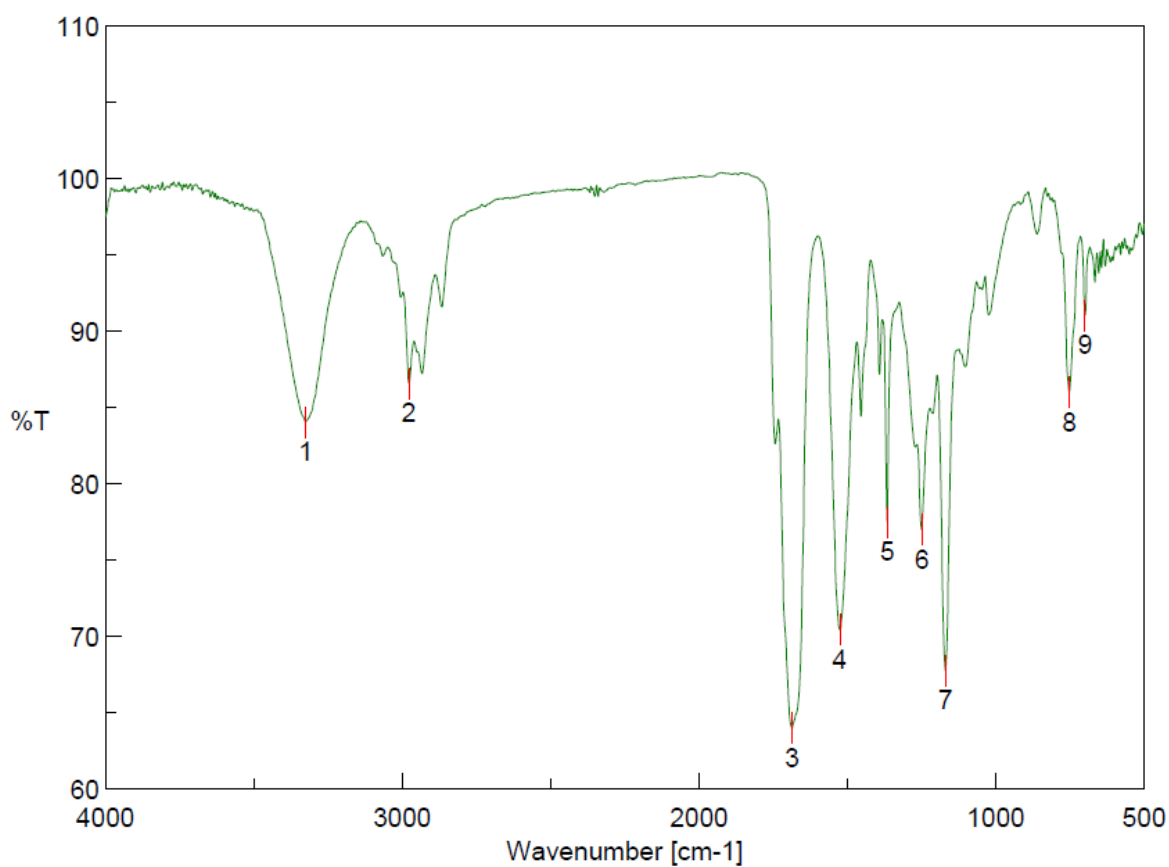

[ ピーク検出結果 ]

| No. | 位置      | 強度      | No. | 位置      | 強度      |
|-----|---------|---------|-----|---------|---------|
| 1   | 3325.64 | 84.0348 | 2   | 2977.55 | 86.5813 |
| 3   | 1686.44 | 63.9845 | 4   | 1525.42 | 70.4228 |
| 5   | 1366.32 | 77.4767 | 6   | 1249.65 | 77.0054 |
| 7   | 1169.62 | 67.79   | 8   | 752.102 | 85.958  |
| 9   | 699.069 | 91.0233 |     |         |         |

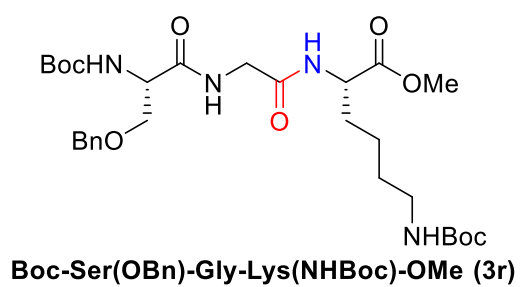

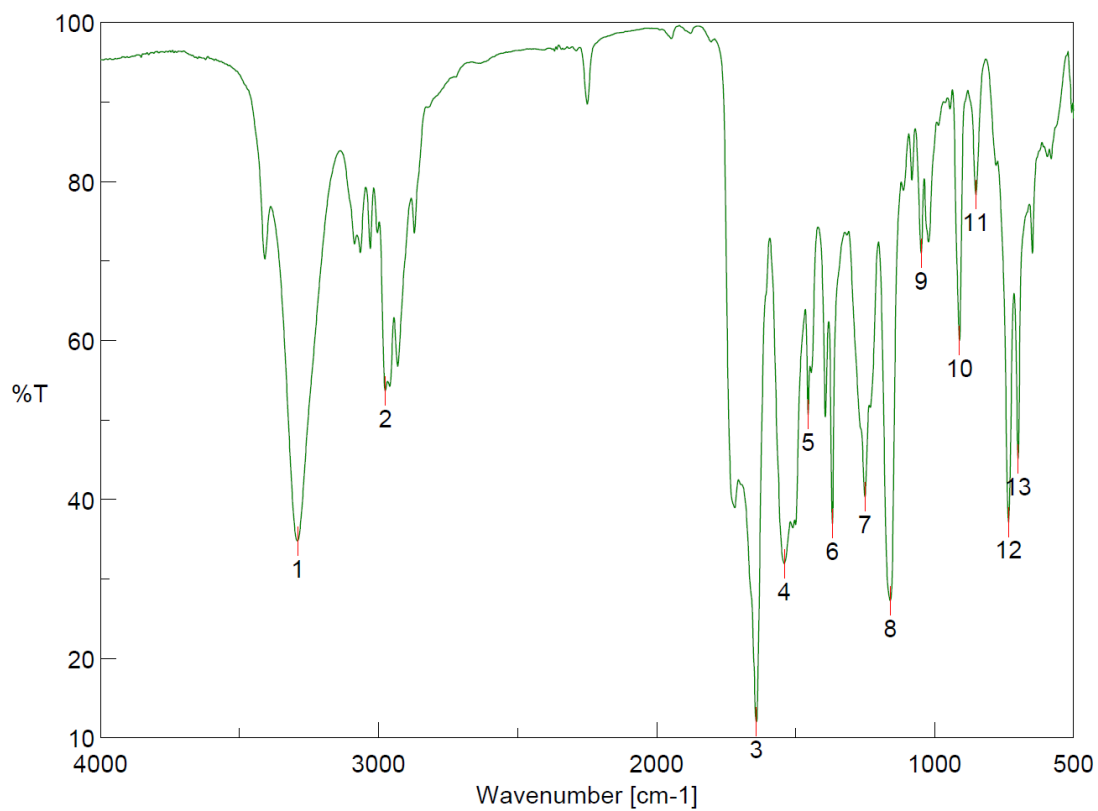

[ ピーク検出結果 ]

| No. | 位置      | 強度      | No. | 位置      | 強度      |
|-----|---------|---------|-----|---------|---------|
| 1   | 3291.89 | 34.7281 | 2   | 2975.62 | 53.6266 |
| 3   | 1641.13 | 11.9959 | 4   | 1540.85 | 31.8723 |
| 5   | 1455.03 | 50.6314 | 6   | 1367.28 | 36.9033 |
| 7   | 1250.61 | 40.3131 | 8   | 1159.01 | 27.2415 |
| 9   | 1048.12 | 70.9378 | 10  | 910.236 | 59.9538 |
| 11  | 851.418 | 78.3084 | 12  | 733.782 | 37.0725 |
| 13  | 699.069 | 45.1068 |     |         |         |

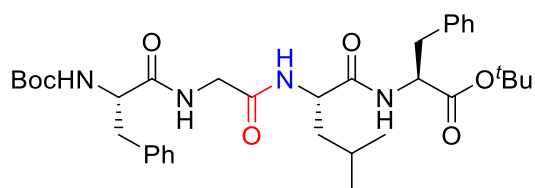

**Boc-Phe-Gly-Leu-Phe-Of-Bu (3s)**

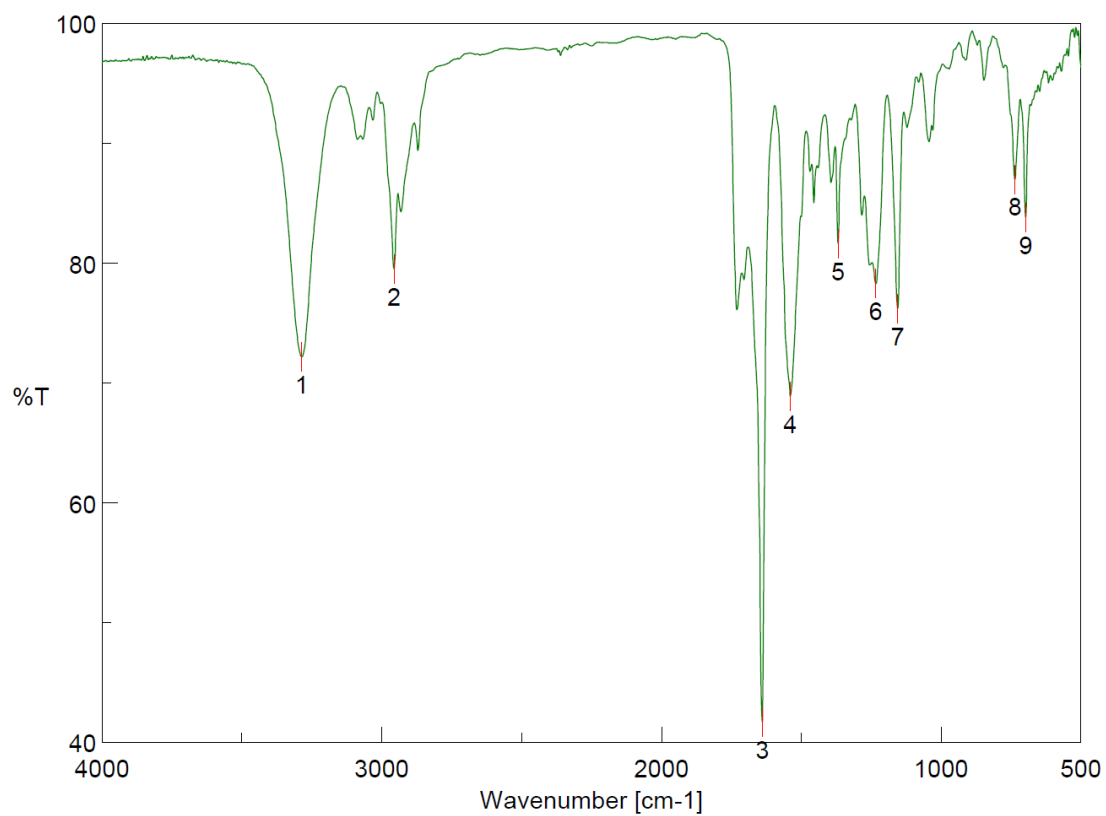

[ ピーク検出結果 ]

| No. | 位置      | 強度      | No. | 位置      | 強度      |
|-----|---------|---------|-----|---------|---------|
| 1   | 3286.11 | 72.1915 | 2   | 2956.34 | 79.5364 |
| 3   | 1639.2  | 41.6939 | 4   | 1538.92 | 68.8885 |
| 5   | 1368.25 | 81.6261 | 6   | 1233.25 | 78.2821 |
| 7   | 1155.15 | 76.1955 | 8   | 735.71  | 86.9833 |
| 9   | 697.141 | 83.8246 |     |         |         |

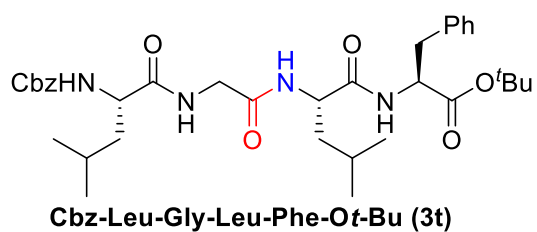

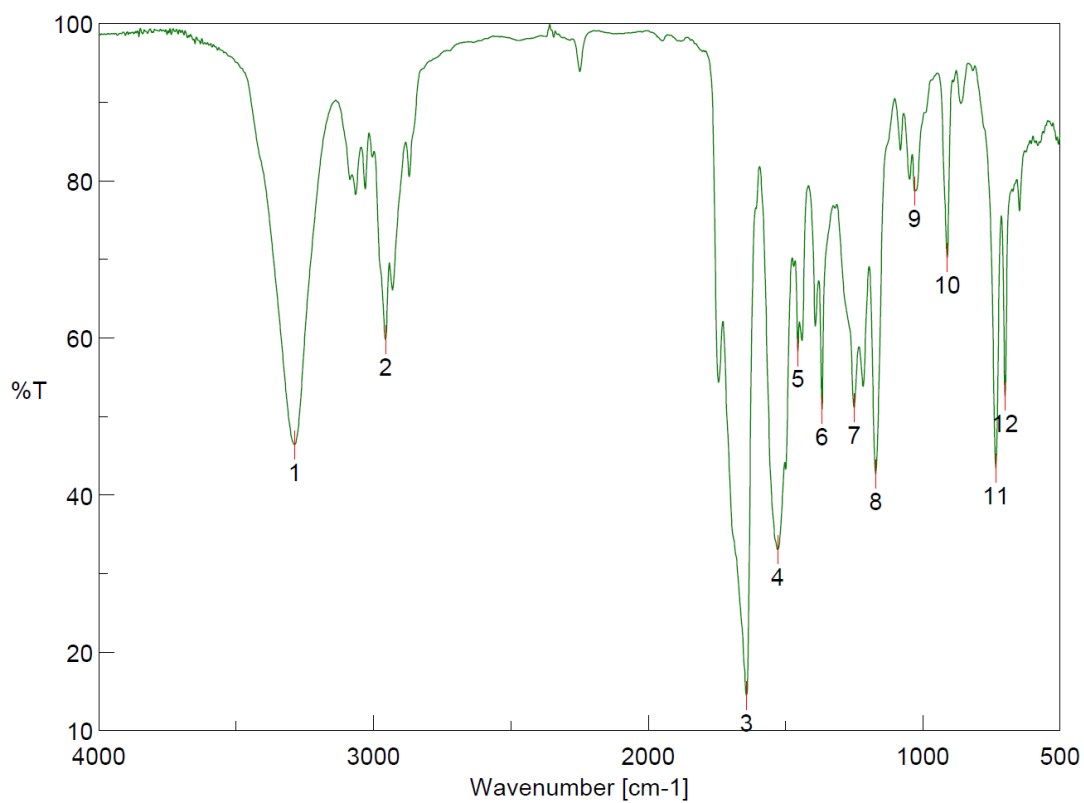

[ ピーク検出結果 ]

| No. | 位置      | 強度      | No. | 位置      | 強度      |
|-----|---------|---------|-----|---------|---------|
| 1   | 3287.07 | 46.3847 | 2   | 2956.34 | 59.7417 |
| 3   | 1642.09 | 14.4701 | 4   | 1528.31 | 33.0283 |
| 5   | 1455.03 | 58.1901 | 6   | 1367.28 | 50.9039 |
| 7   | 1249.65 | 51.0945 | 8   | 1171.54 | 42.625  |
| 9   | 1029.8  | 78.6058 | 10  | 911.201 | 70.1885 |
| 11  | 733.782 | 43.3694 | 12  | 700.034 | 52.4965 |

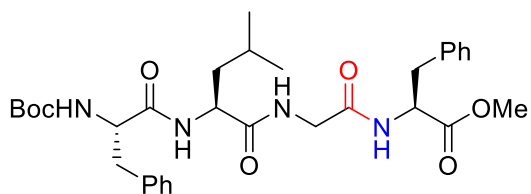

**Boc-Phe-Leu-Gly-Phe-OMe (3u)**

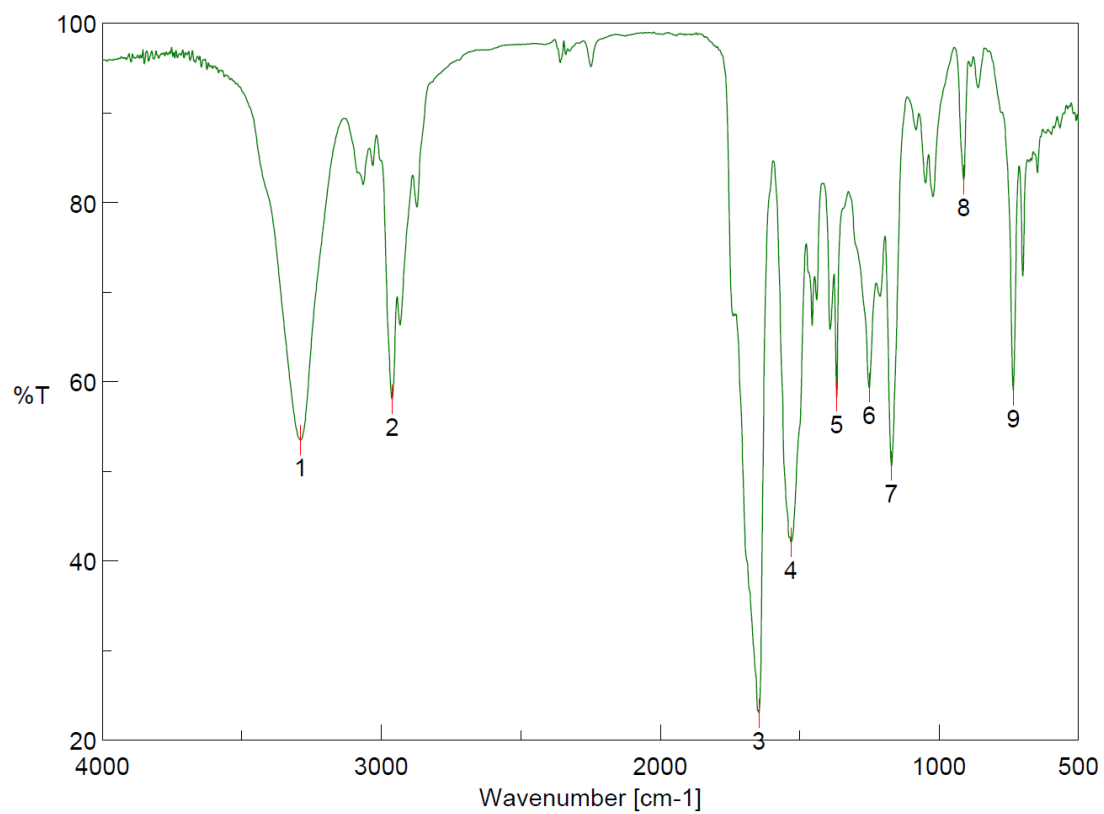

[ ピーク検出結果 ]

| No. | 位置      | 強度      | No. | 位置      | 強度      |
|-----|---------|---------|-----|---------|---------|
| 1   | 3289    | 53.4656 | 2   | 2961.16 | 57.9913 |
| 3   | 1645.95 | 23.0177 | 4   | 1530.24 | 42.0124 |
| 5   | 1367.28 | 58.253  | 6   | 1250.61 | 59.3112 |
| 7   | 1170.58 | 50.5711 | 8   | 911.201 | 82.532  |
| 9   | 733.782 | 58.9794 |     |         |         |

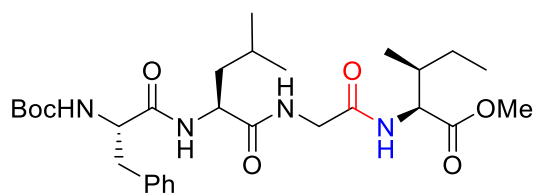

**Boc-Phe-Leu-Gly-Ile-OMe (3v)**

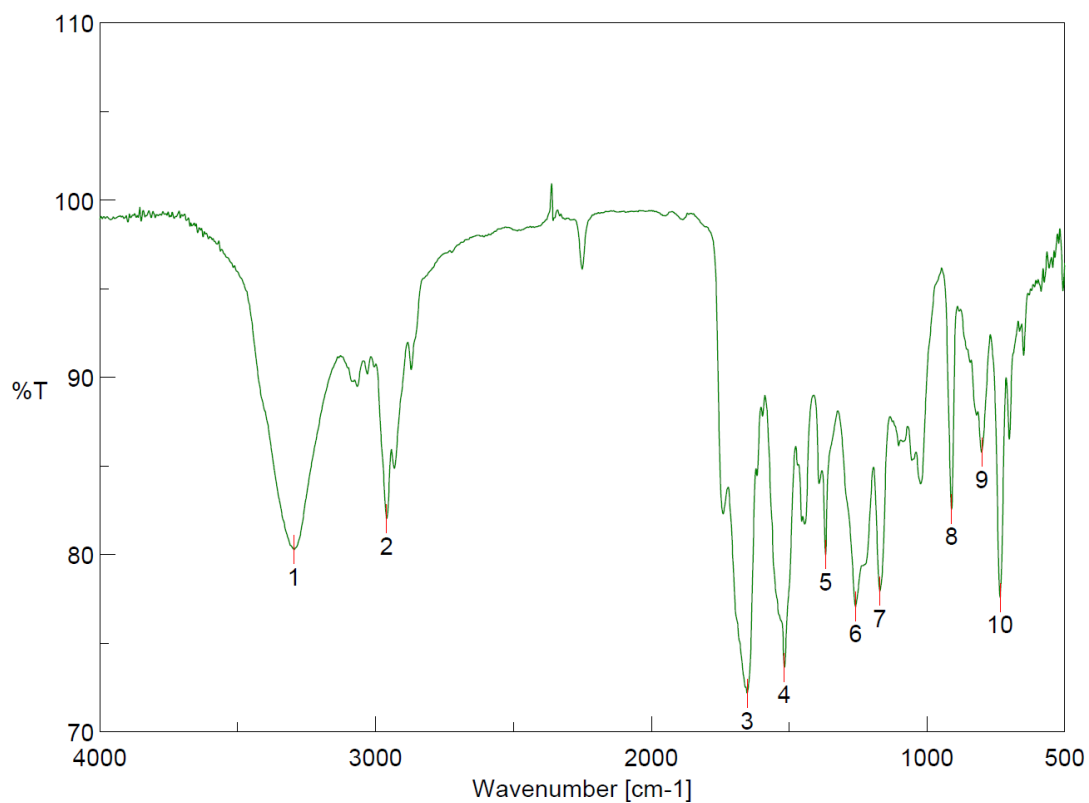

[ ピーク検出結果 ]

| No. | 位置      | 強度      | No. | 位置      | 強度      |
|-----|---------|---------|-----|---------|---------|
| 1   | 3295.75 | 80.2578 | 2   | 2959.23 | 82.0158 |
| 3   | 1651.73 | 72.164  | 4   | 1516.74 | 73.6263 |
| 5   | 1367.28 | 79.9733 | 6   | 1259.29 | 77.0601 |
| 7   | 1170.58 | 77.913  | 8   | 910.236 | 82.543  |
| 9   | 801.278 | 85.7612 | 10  | 734.746 | 77.5714 |

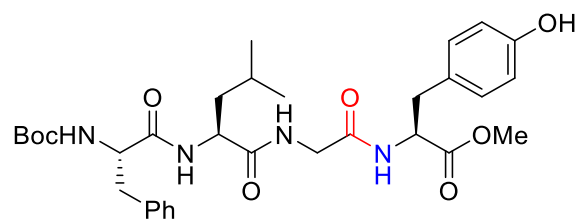

**Boc-Phe-Leu-Gly-Tyr-OMe (3w)**

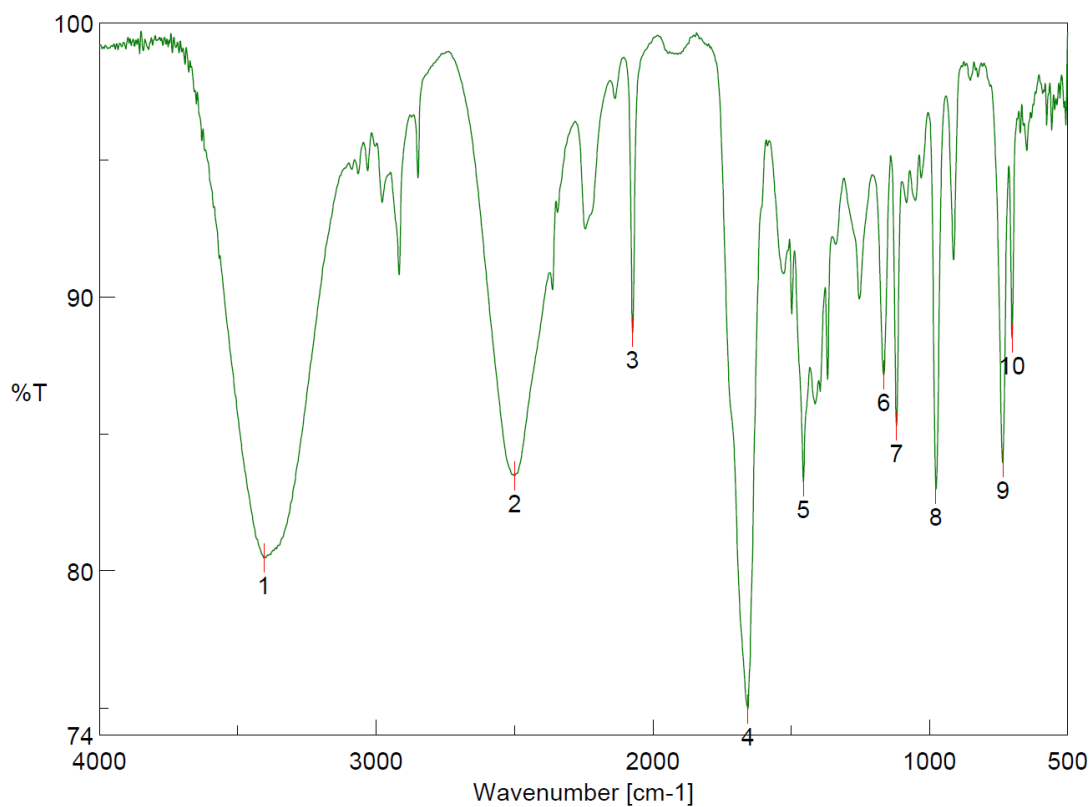

[ ピーク検出結果 ]

| No. | 位置      | 強度      | No. | 位置      | 強度      |
|-----|---------|---------|-----|---------|---------|
| 1   | 3405.67 | 80.4743 | 2   | 2499.29 | 83.4713 |
| 3   | 2073.1  | 88.7074 | 4   | 1655.59 | 74.948  |
| 5   | 1455.99 | 83.2477 | 6   | 1164.79 | 87.1448 |
| 7   | 1118.51 | 85.2991 | 8   | 975.804 | 82.9677 |
| 9   | 734.746 | 83.9333 | 10  | 700.998 | 88.4719 |

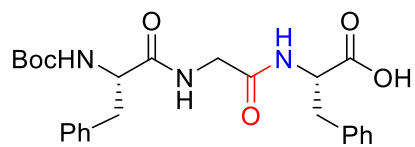

**Boc-Phe-Gly-Phe-OH (3x)**

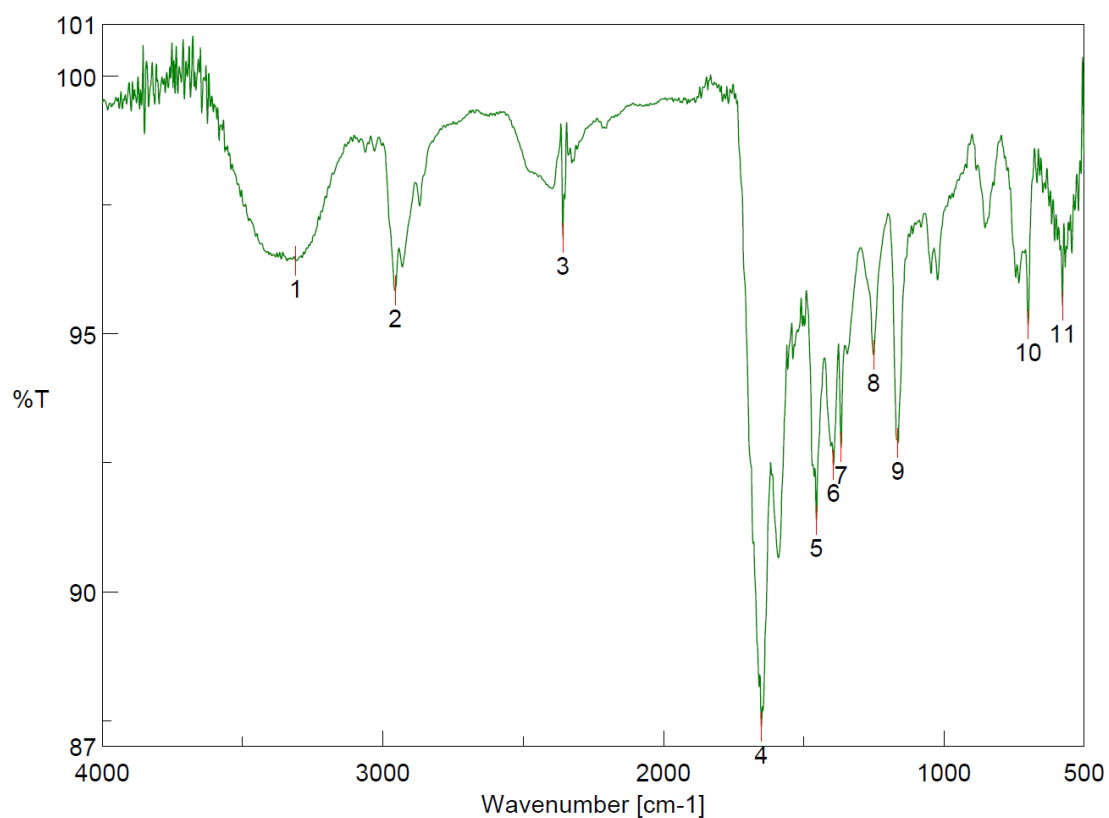

[ ピーク検出結果 ]

| No. | 位置      | 強度      | No. | 位置      | 強度      |
|-----|---------|---------|-----|---------|---------|
| 1   | 3310.21 | 96.4073 | 2   | 2956.34 | 95.8378 |
| 3   | 2358.52 | 96.8568 | 4   | 1650.77 | 87.3806 |
| 5   | 1455.03 | 91.3791 | 6   | 1393.32 | 92.4463 |
| 7   | 1366.32 | 92.7953 | 8   | 1250.61 | 94.5888 |
| 9   | 1163.83 | 92.8854 | 10  | 699.069 | 95.1729 |
| 11  | 577.576 | 95.5465 |     |         |         |

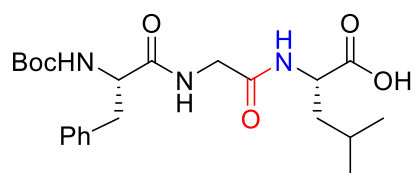

**Boc-Phe-Gly-Leu-OH (3y)**

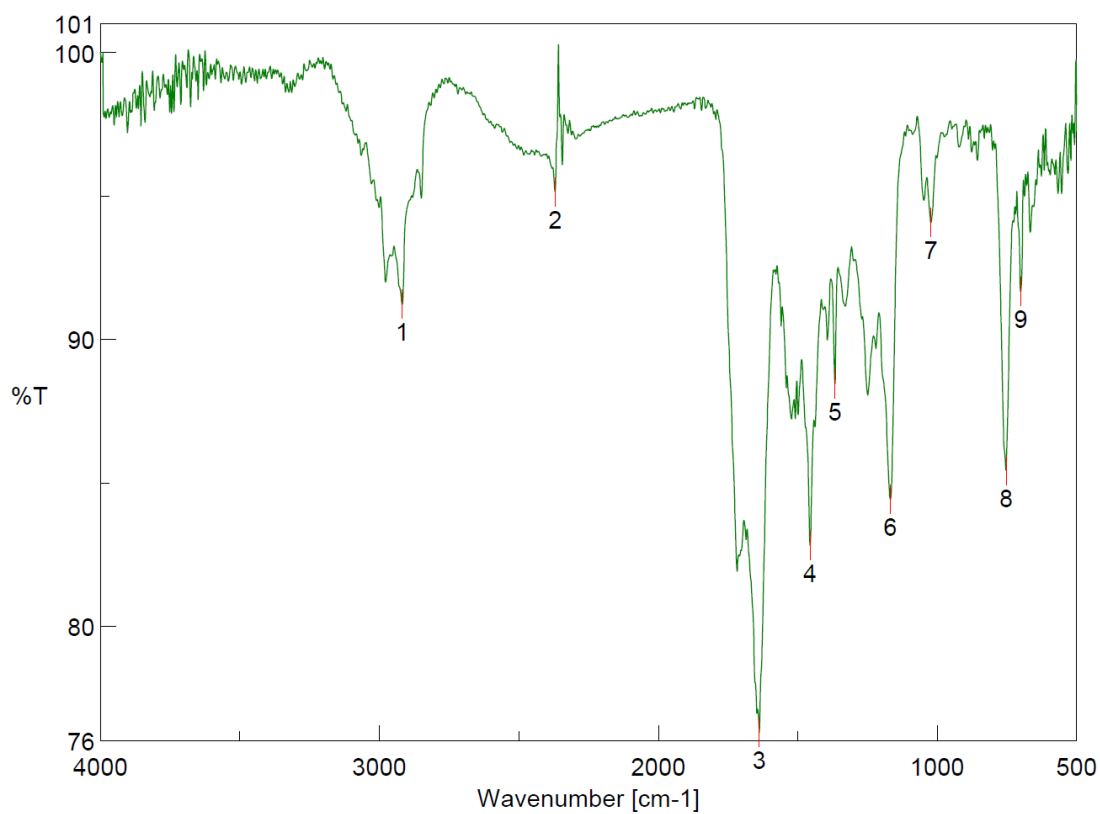

[ ピーク検出結果 ]

| No. | 位置      | 強度      | No. | 位置      | 強度      |
|-----|---------|---------|-----|---------|---------|
| 1   | 2917.77 | 91.2052 | 2   | 2370.09 | 95.1349 |
| 3   | 1637.27 | 76.2818 | 4   | 1455.99 | 82.8108 |
| 5   | 1366.32 | 88.4422 | 6   | 1167.69 | 84.4209 |
| 7   | 1022.09 | 94.0591 | 8   | 753.066 | 85.421  |
| 9   | 700.034 | 91.6616 |     |         |         |

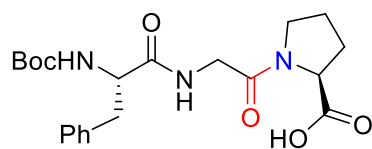

**Boc-Phe-Gly-Pro-OH (3z)**

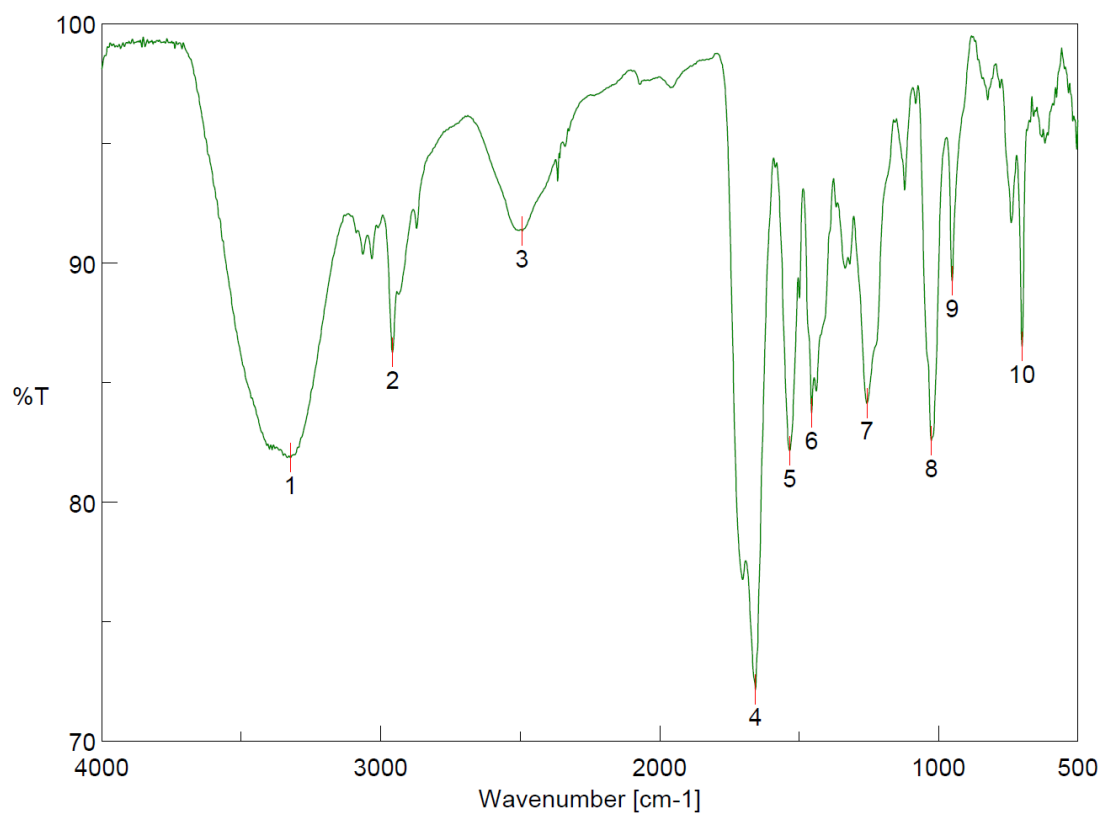

[ ピーク検出結果 ]

| No. | 位置      | 強度      | No. | 位置      | 強度      |
|-----|---------|---------|-----|---------|---------|
| 1   | 3323.71 | 81.8571 | 2   | 2957.3  | 86.2596 |
| 3   | 2492.54 | 91.3369 | 4   | 1655.59 | 72.1555 |
| 5   | 1533.13 | 82.1429 | 6   | 1455.03 | 83.7237 |
| 7   | 1256.4  | 84.1271 | 8   | 1025.94 | 82.5779 |
| 9   | 950.734 | 89.2438 | 10  | 700.034 | 86.5    |

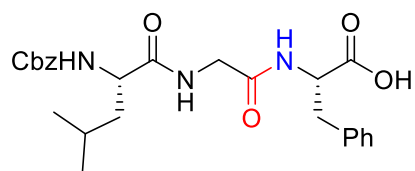

**Cbz-Leu-Gly-Phe-OH (3aa)**
